# Supplementary material
Source: publisher figshare collection journal article supplement (https://geolsoc.figshare.com/articles/dataset/_/3453344)

0 Ma

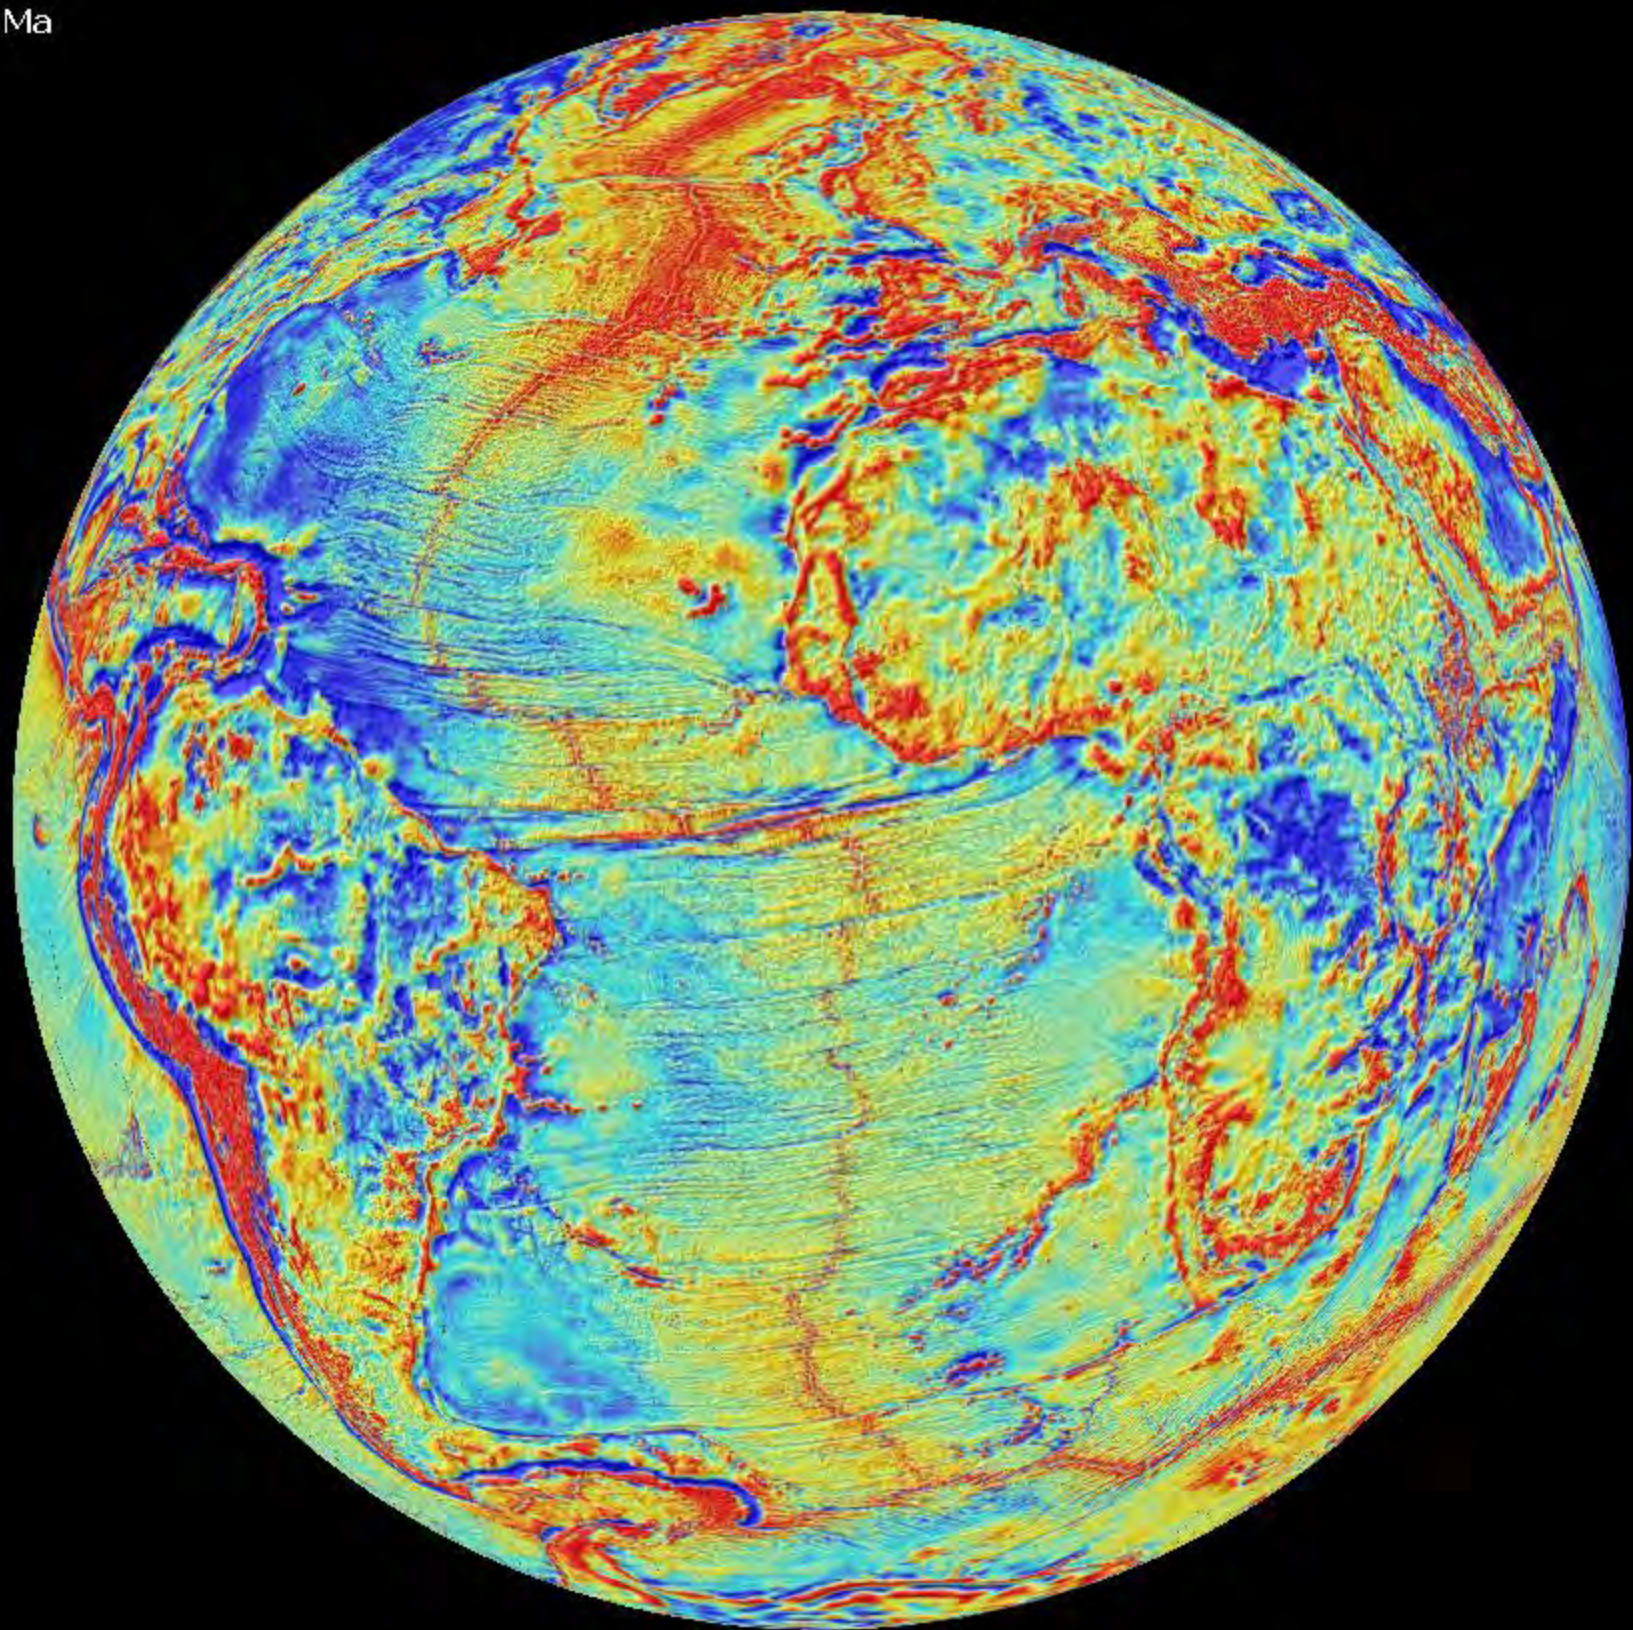



5 Ma

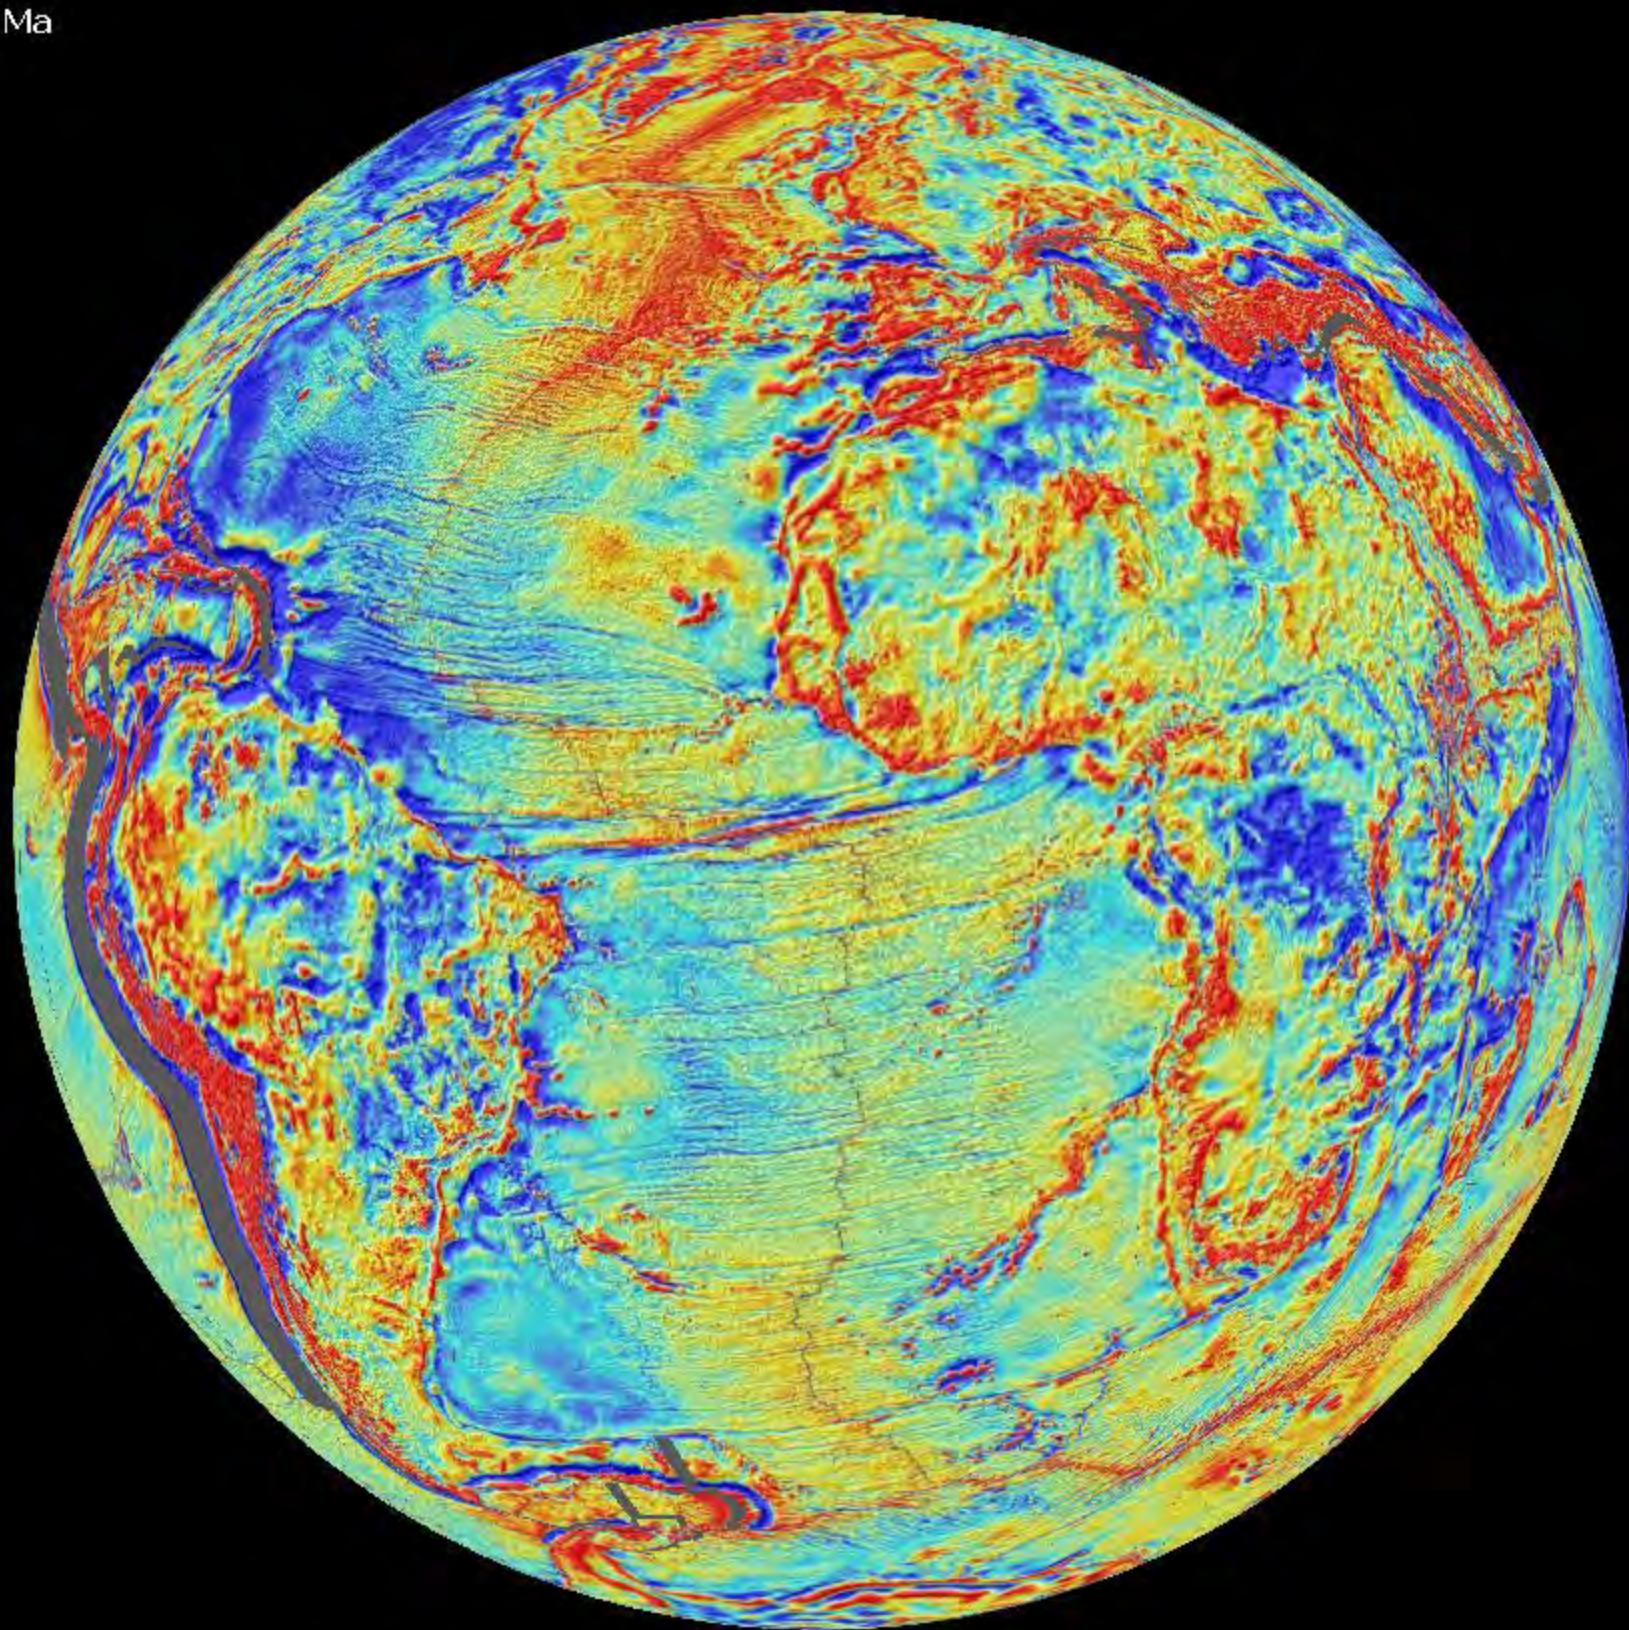



10 Ma

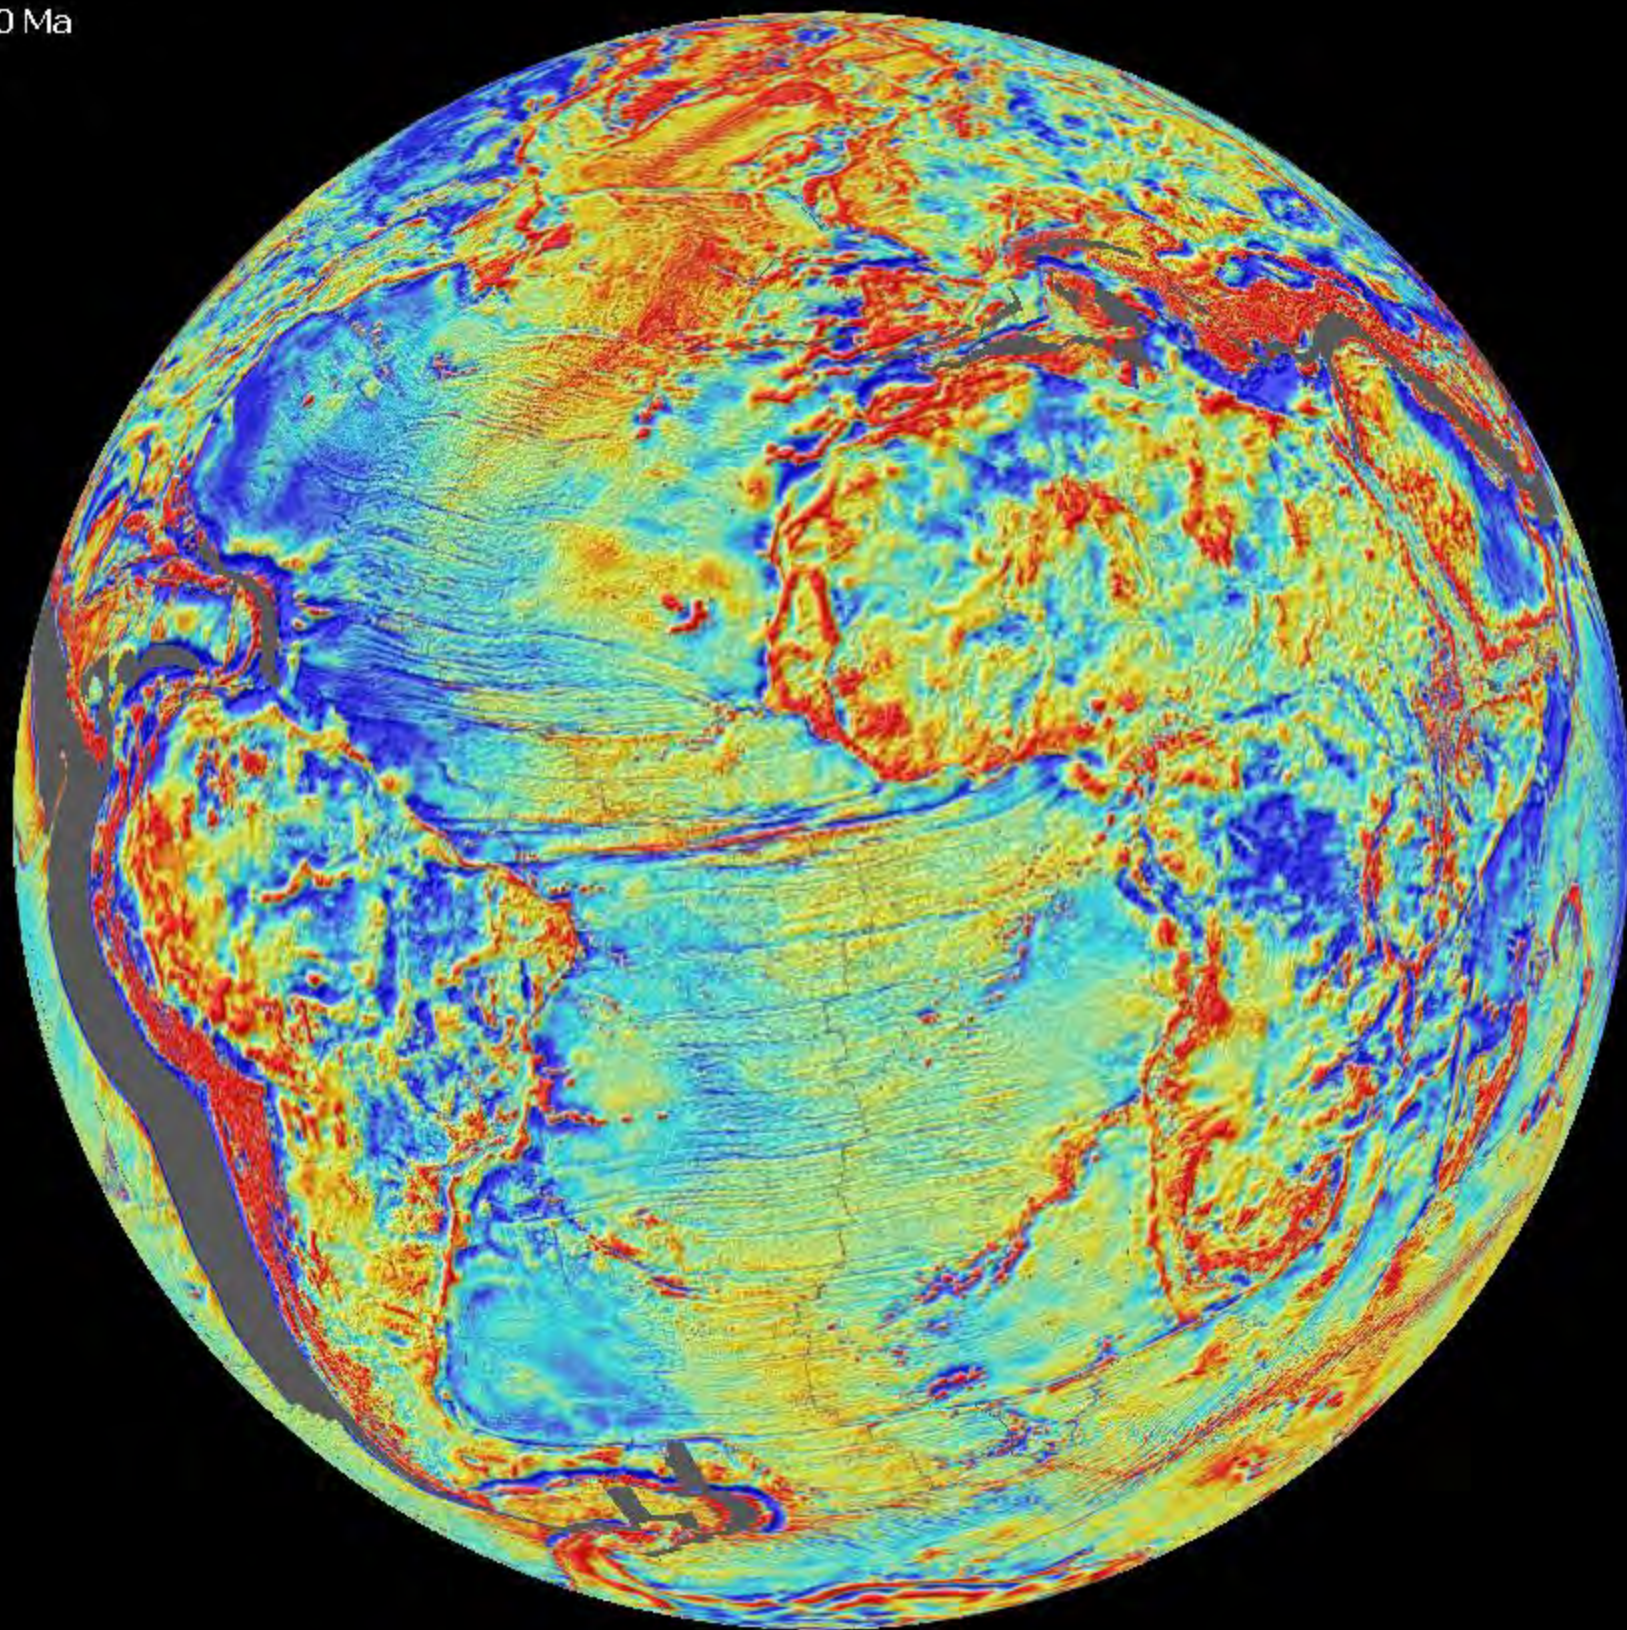



15 Ma

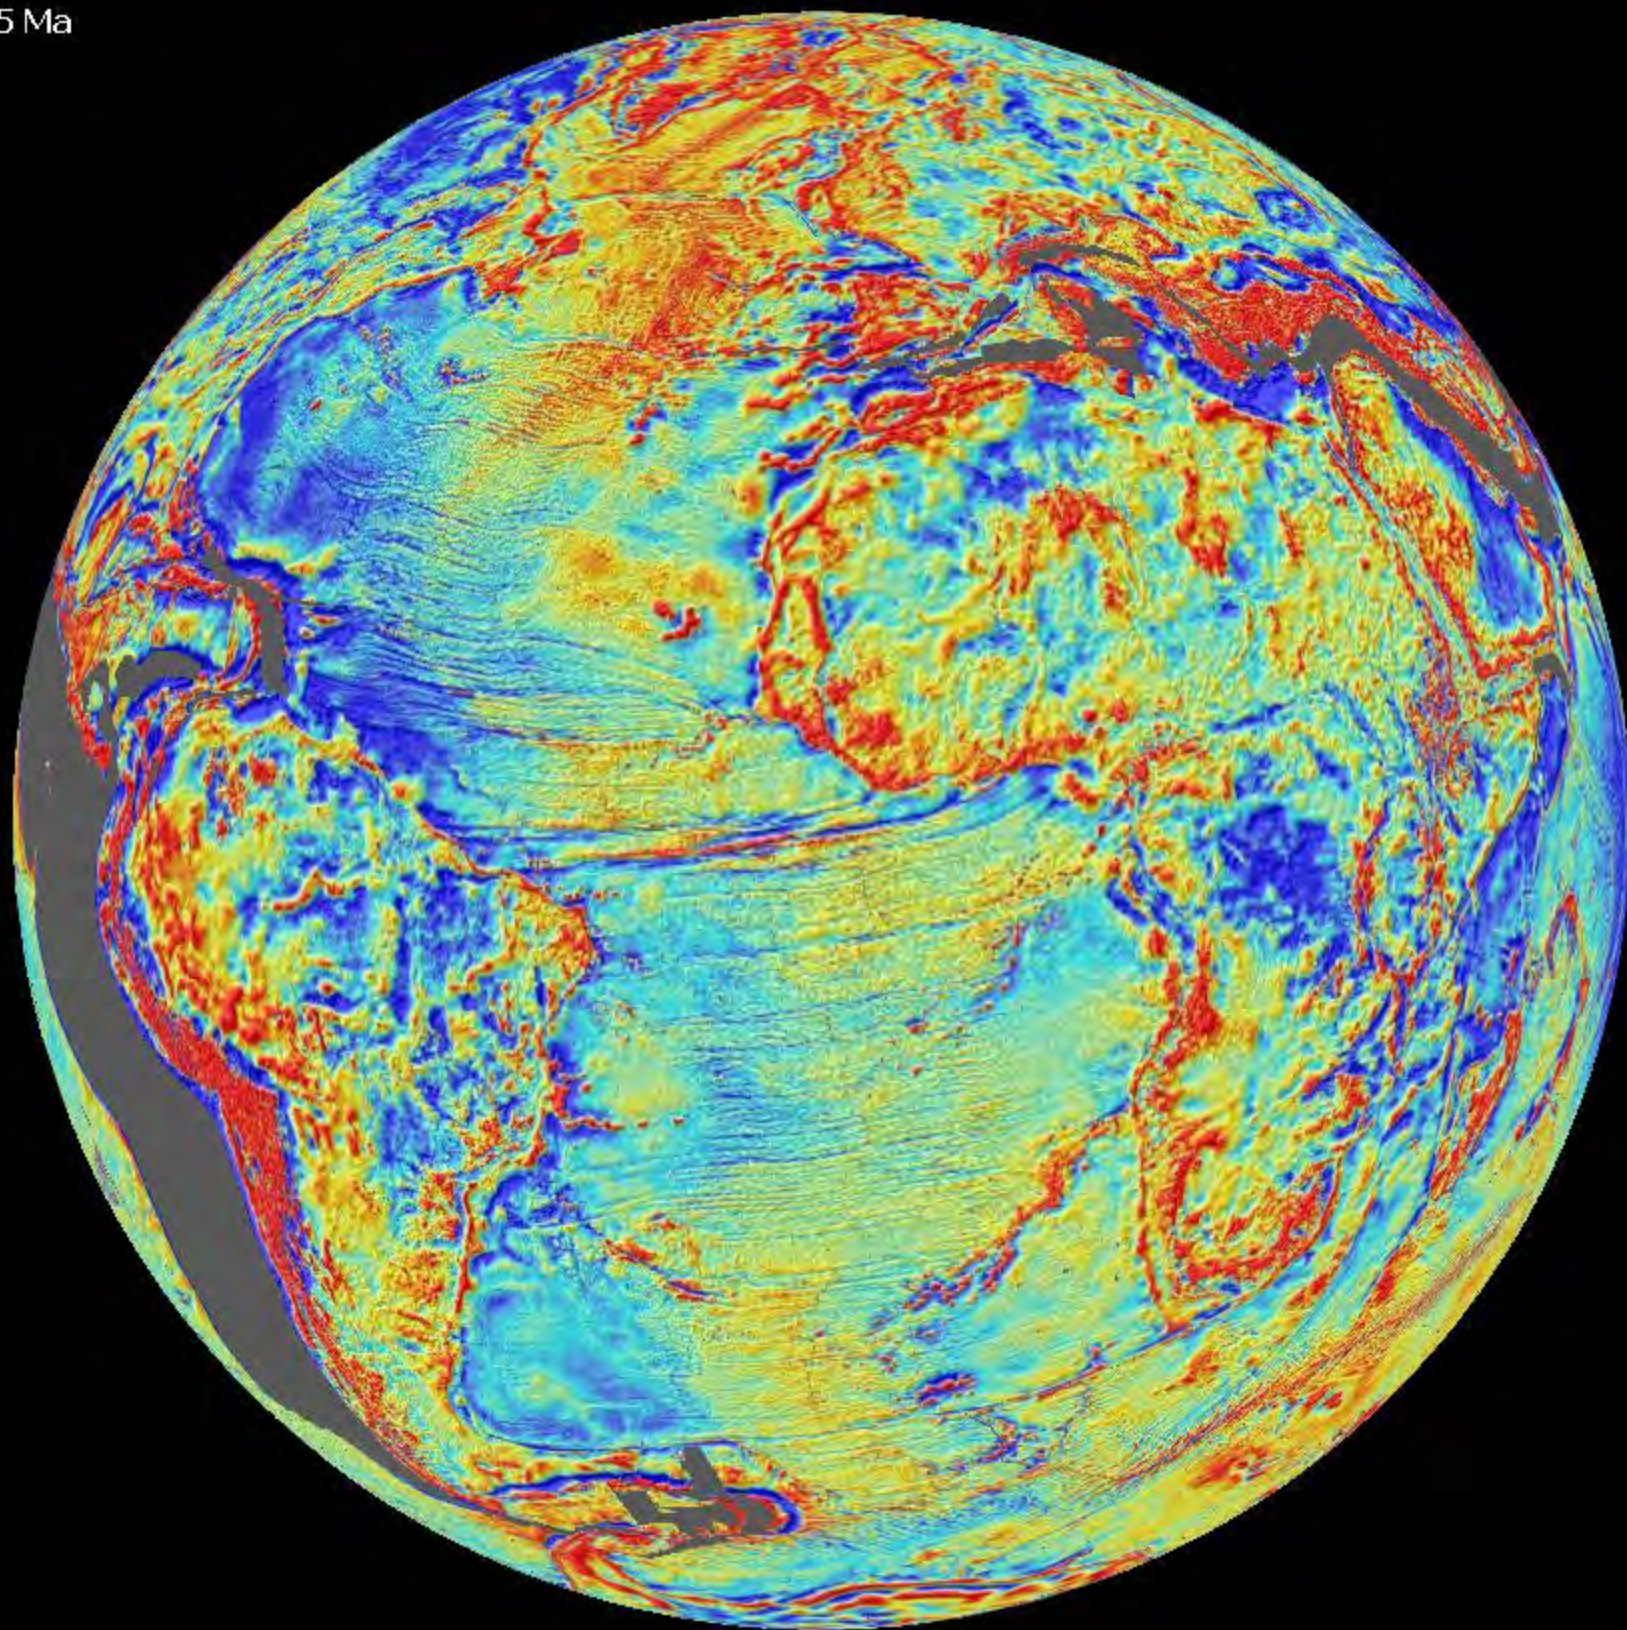



20 Ma

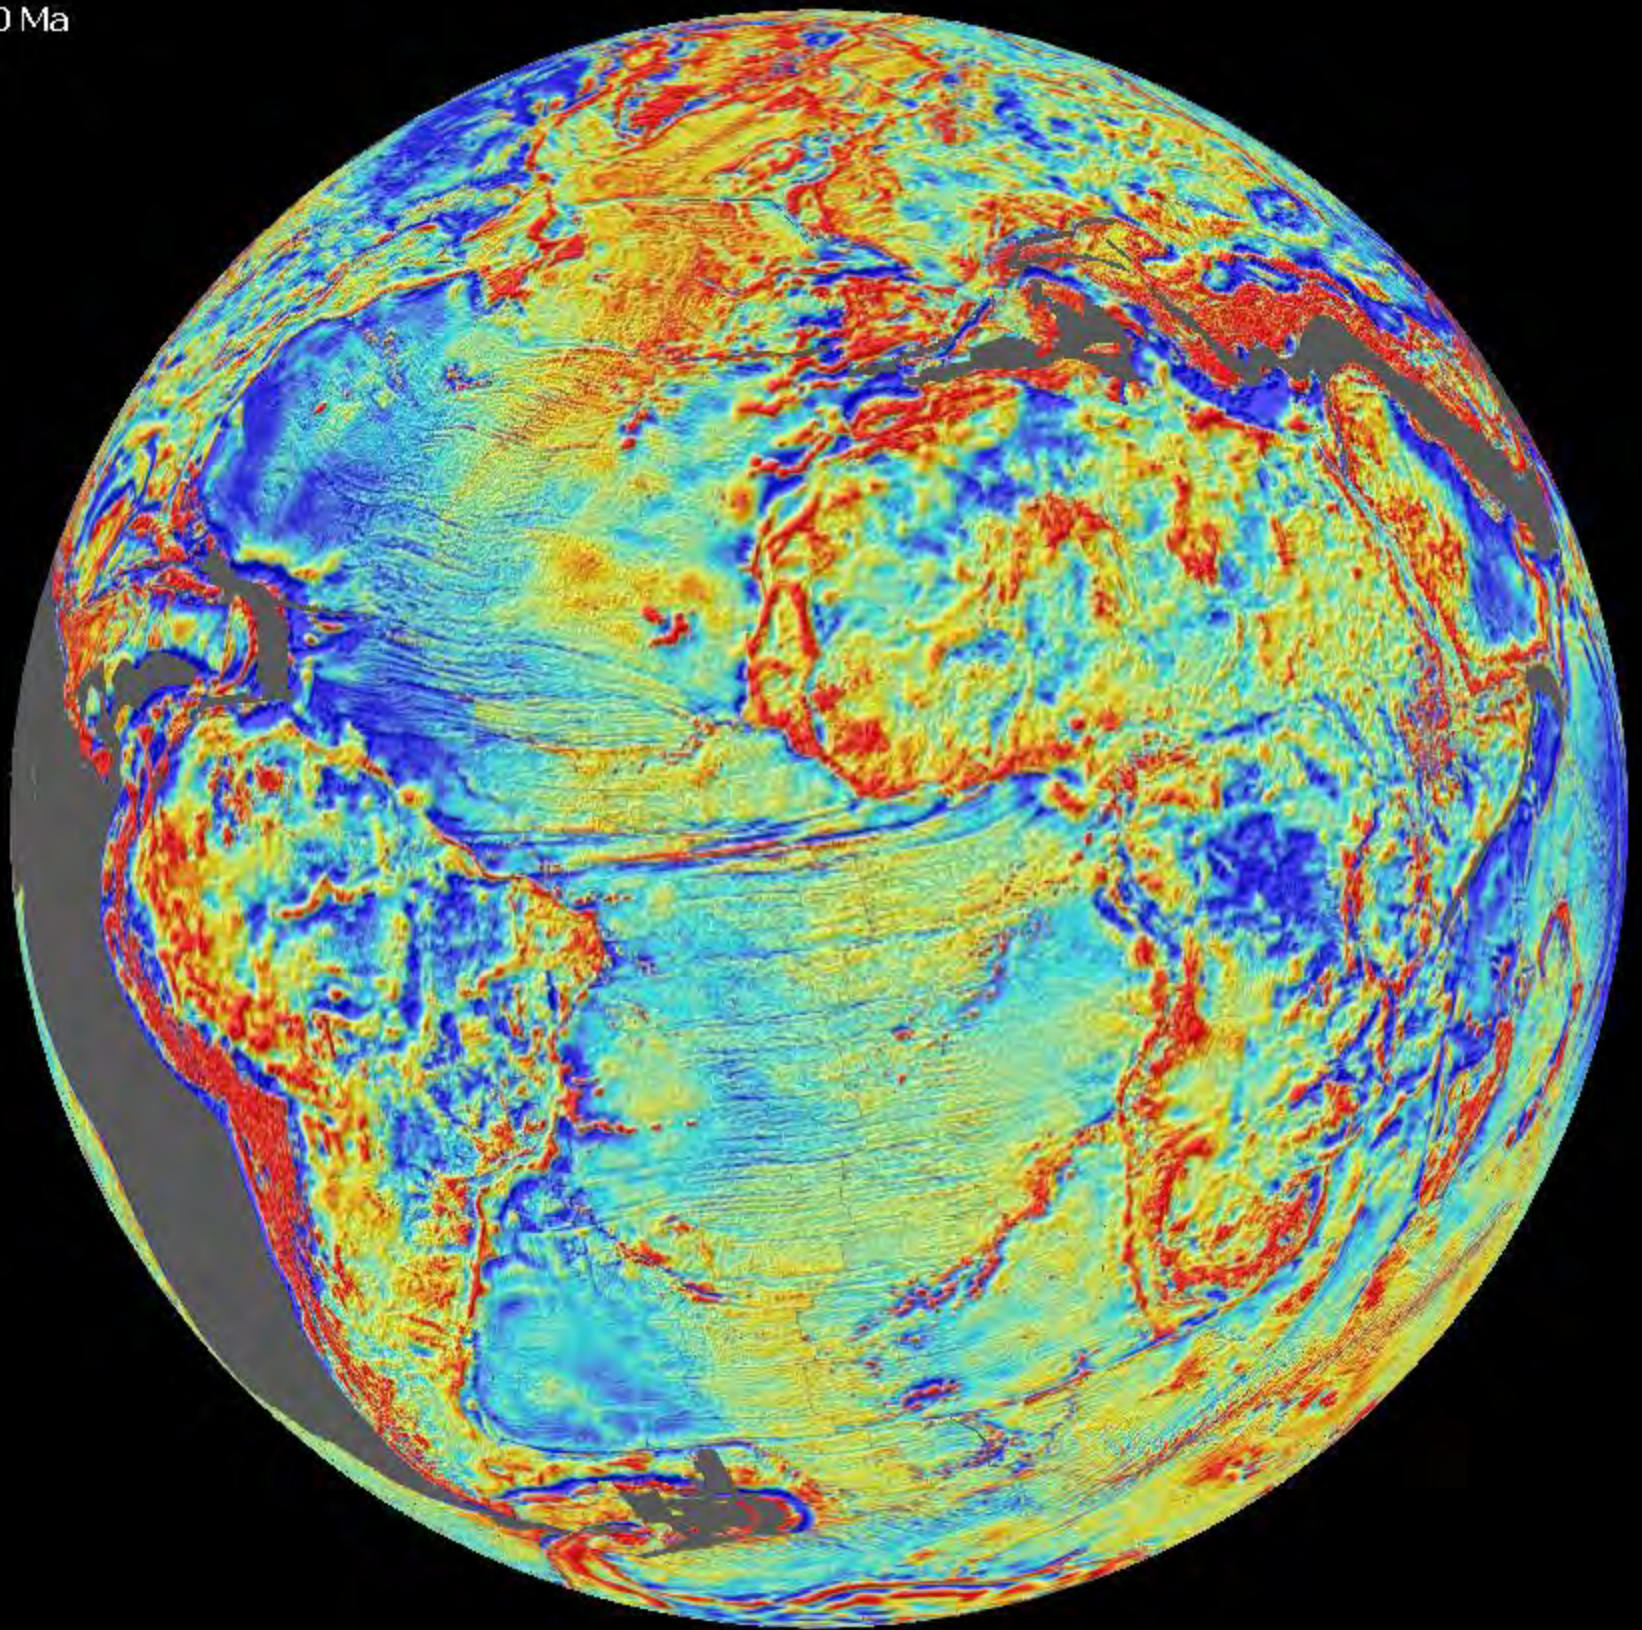



25 Ma

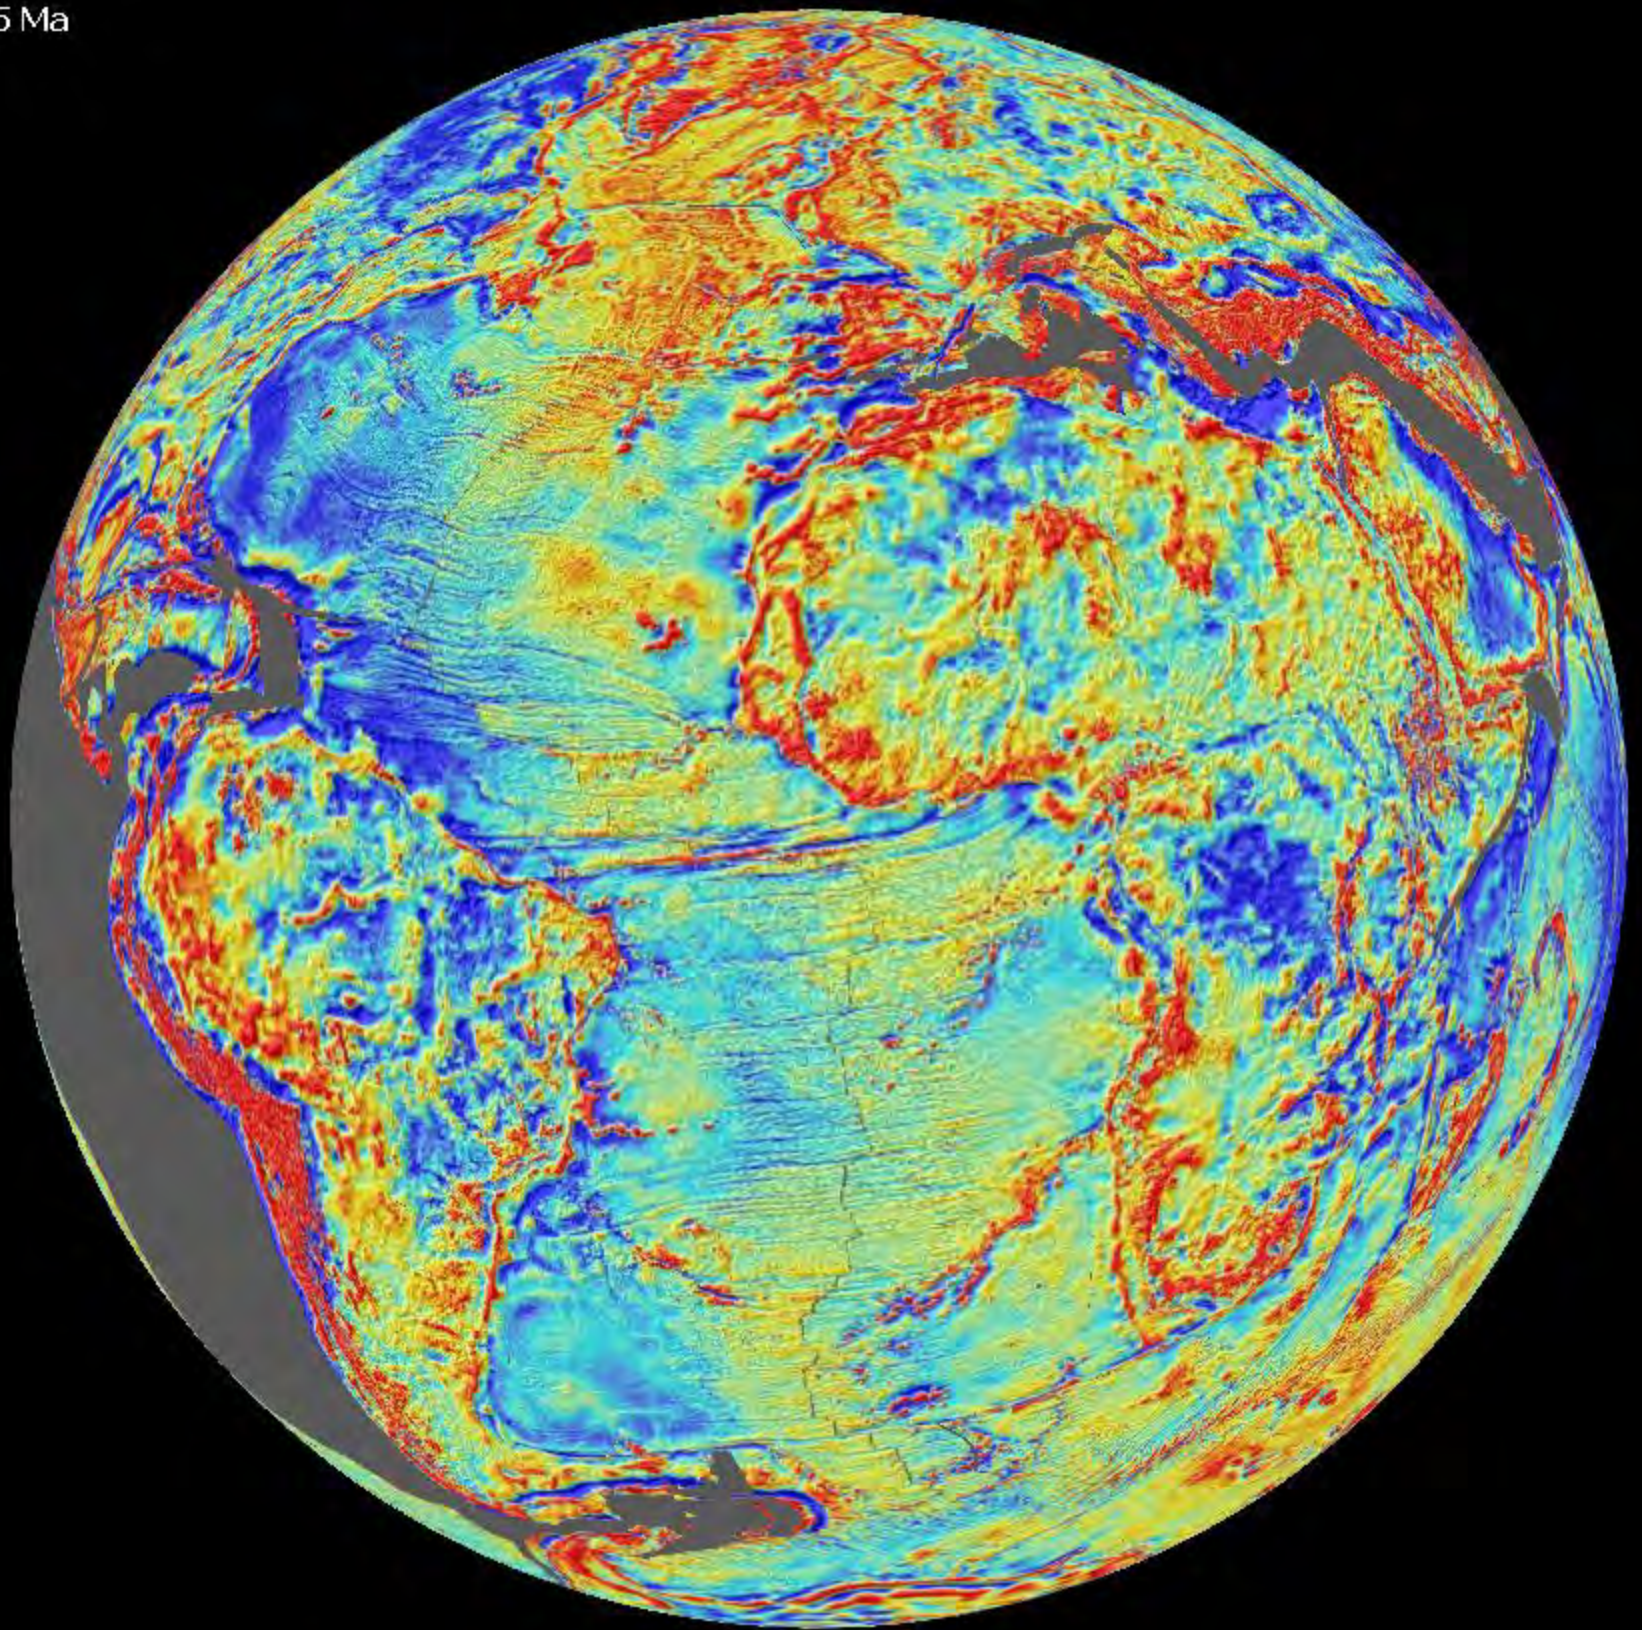



30 Ma

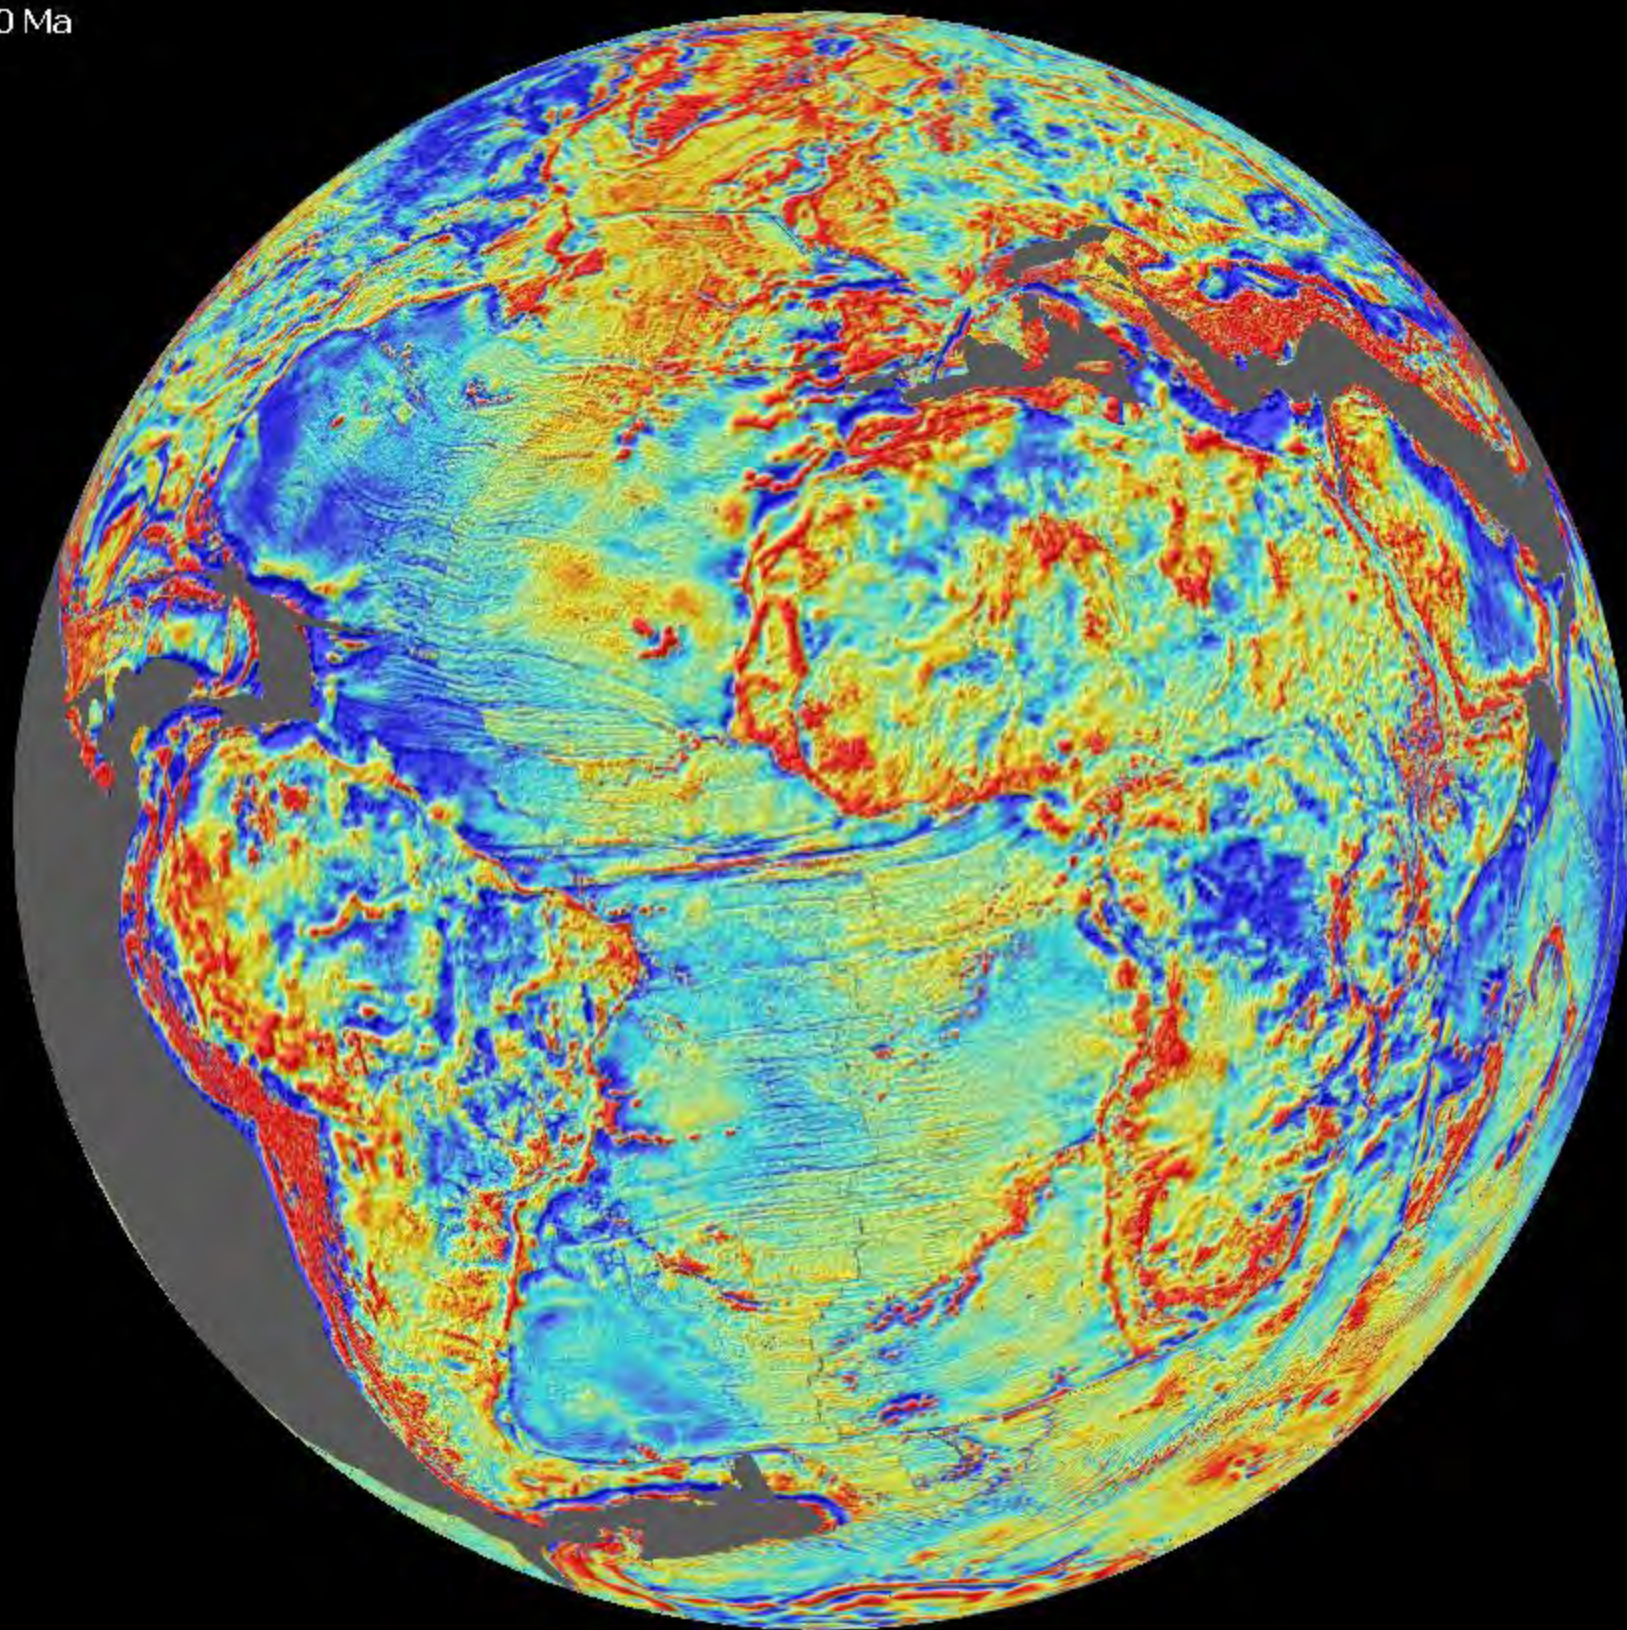



35 Ma

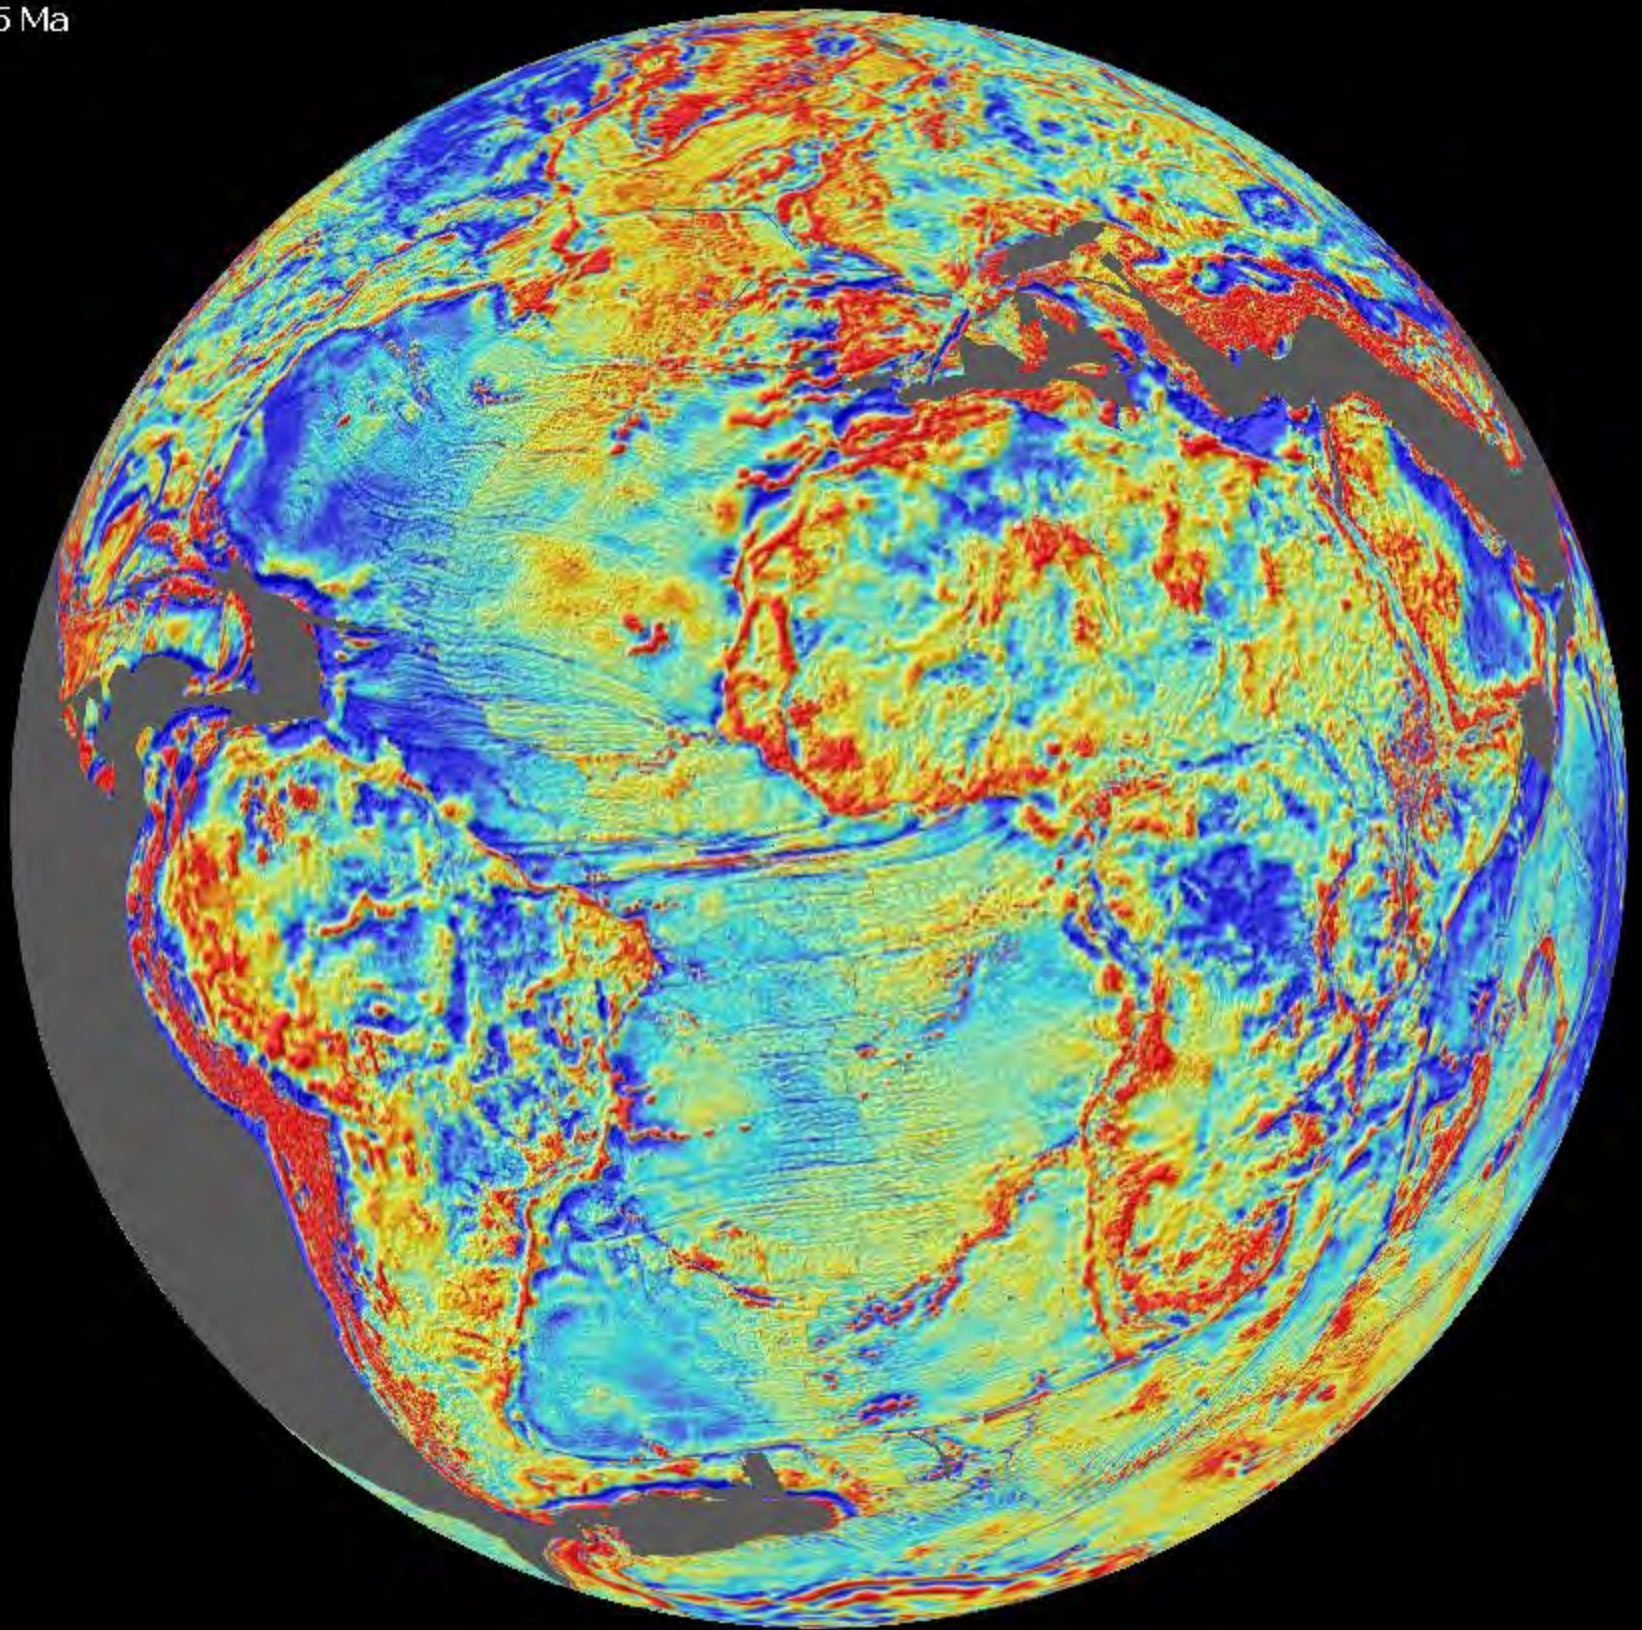



40 Ma

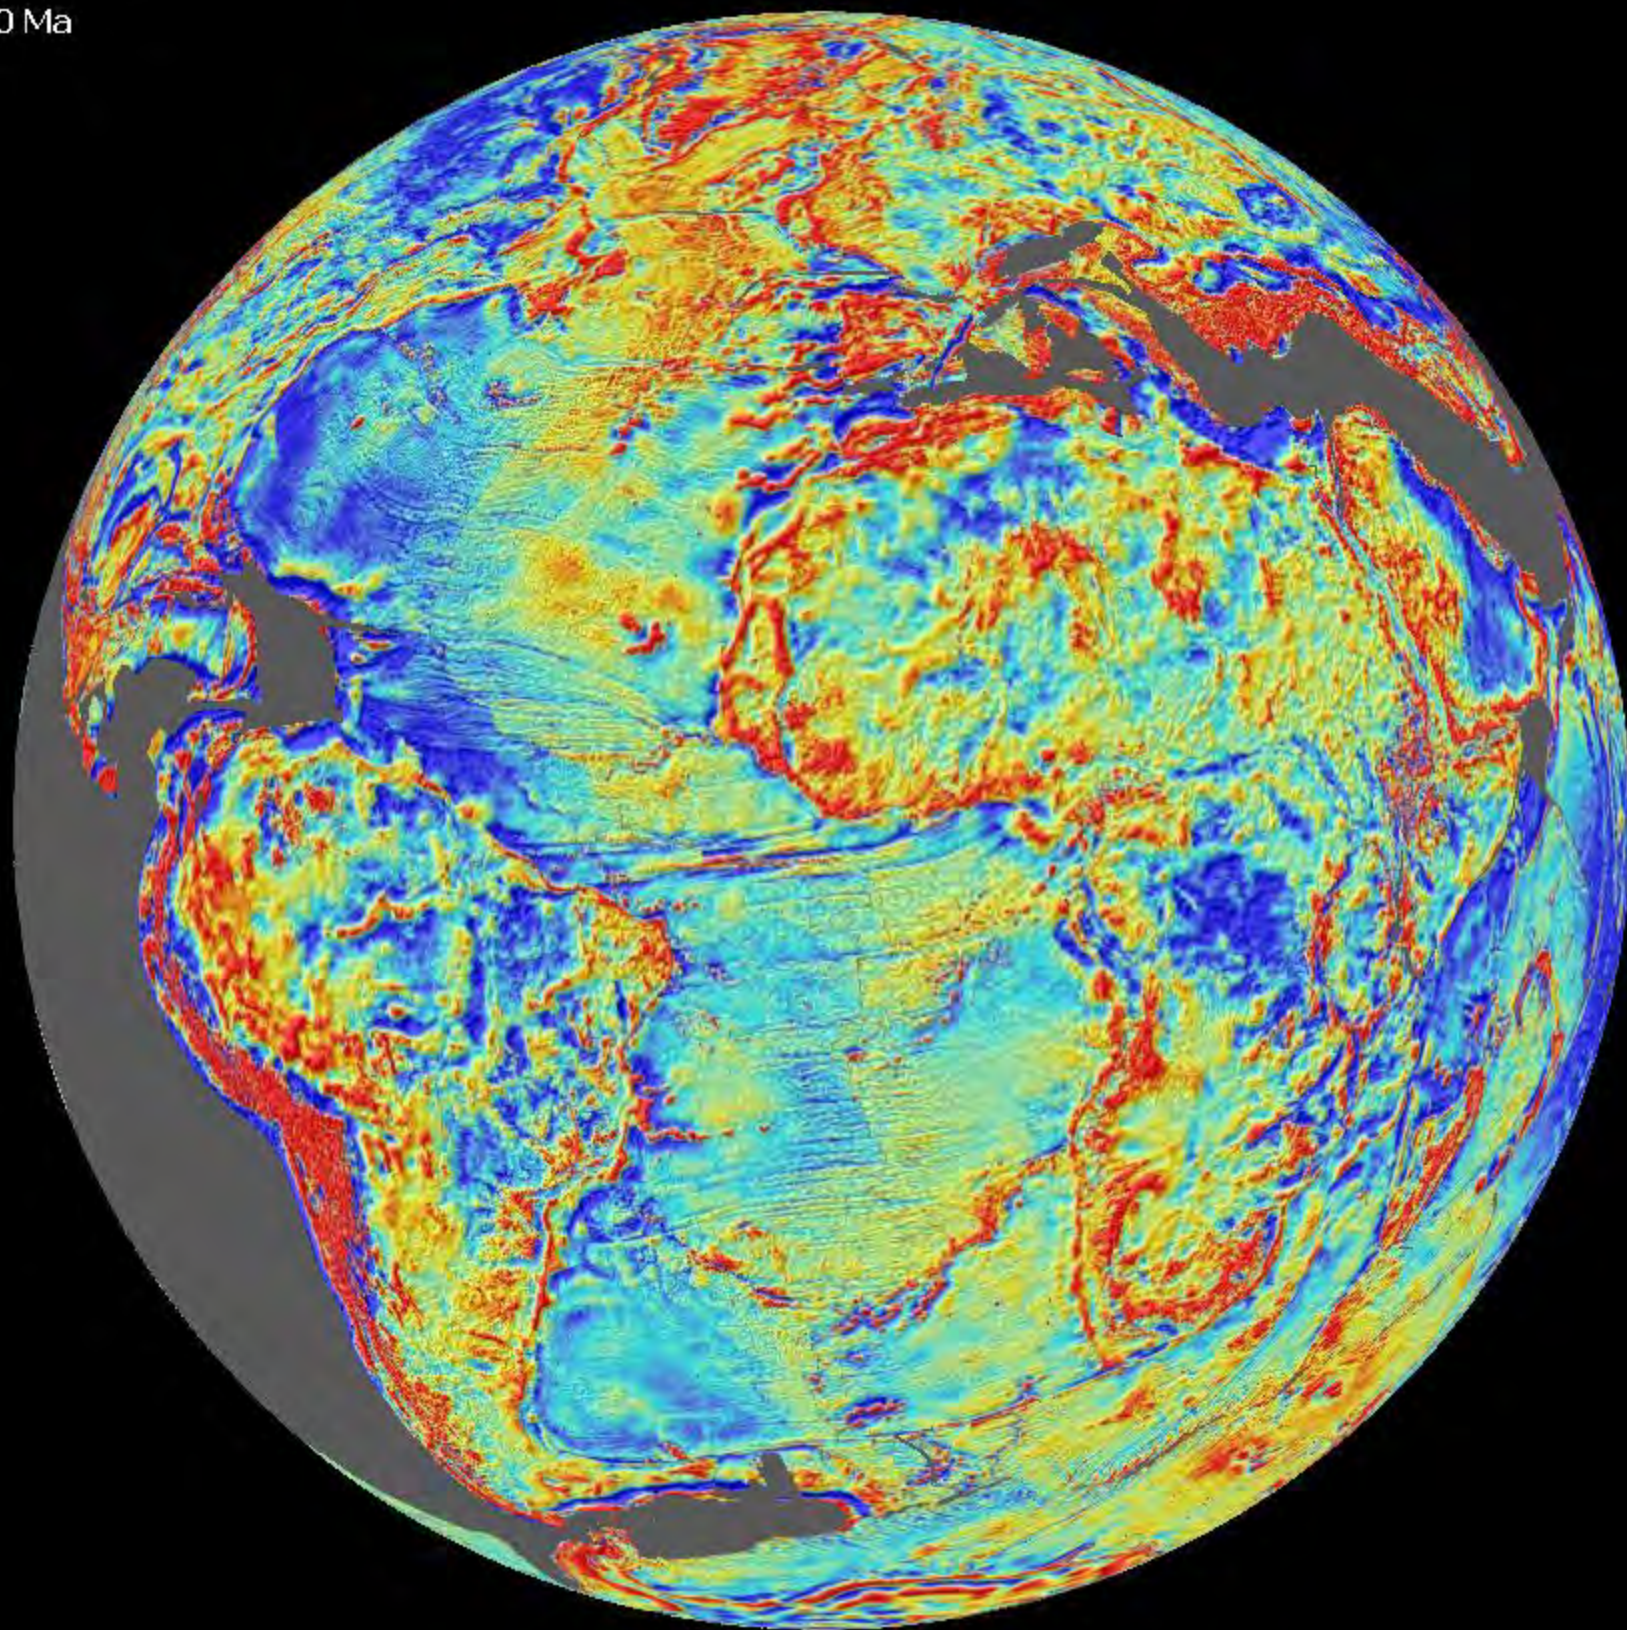



45 Ma

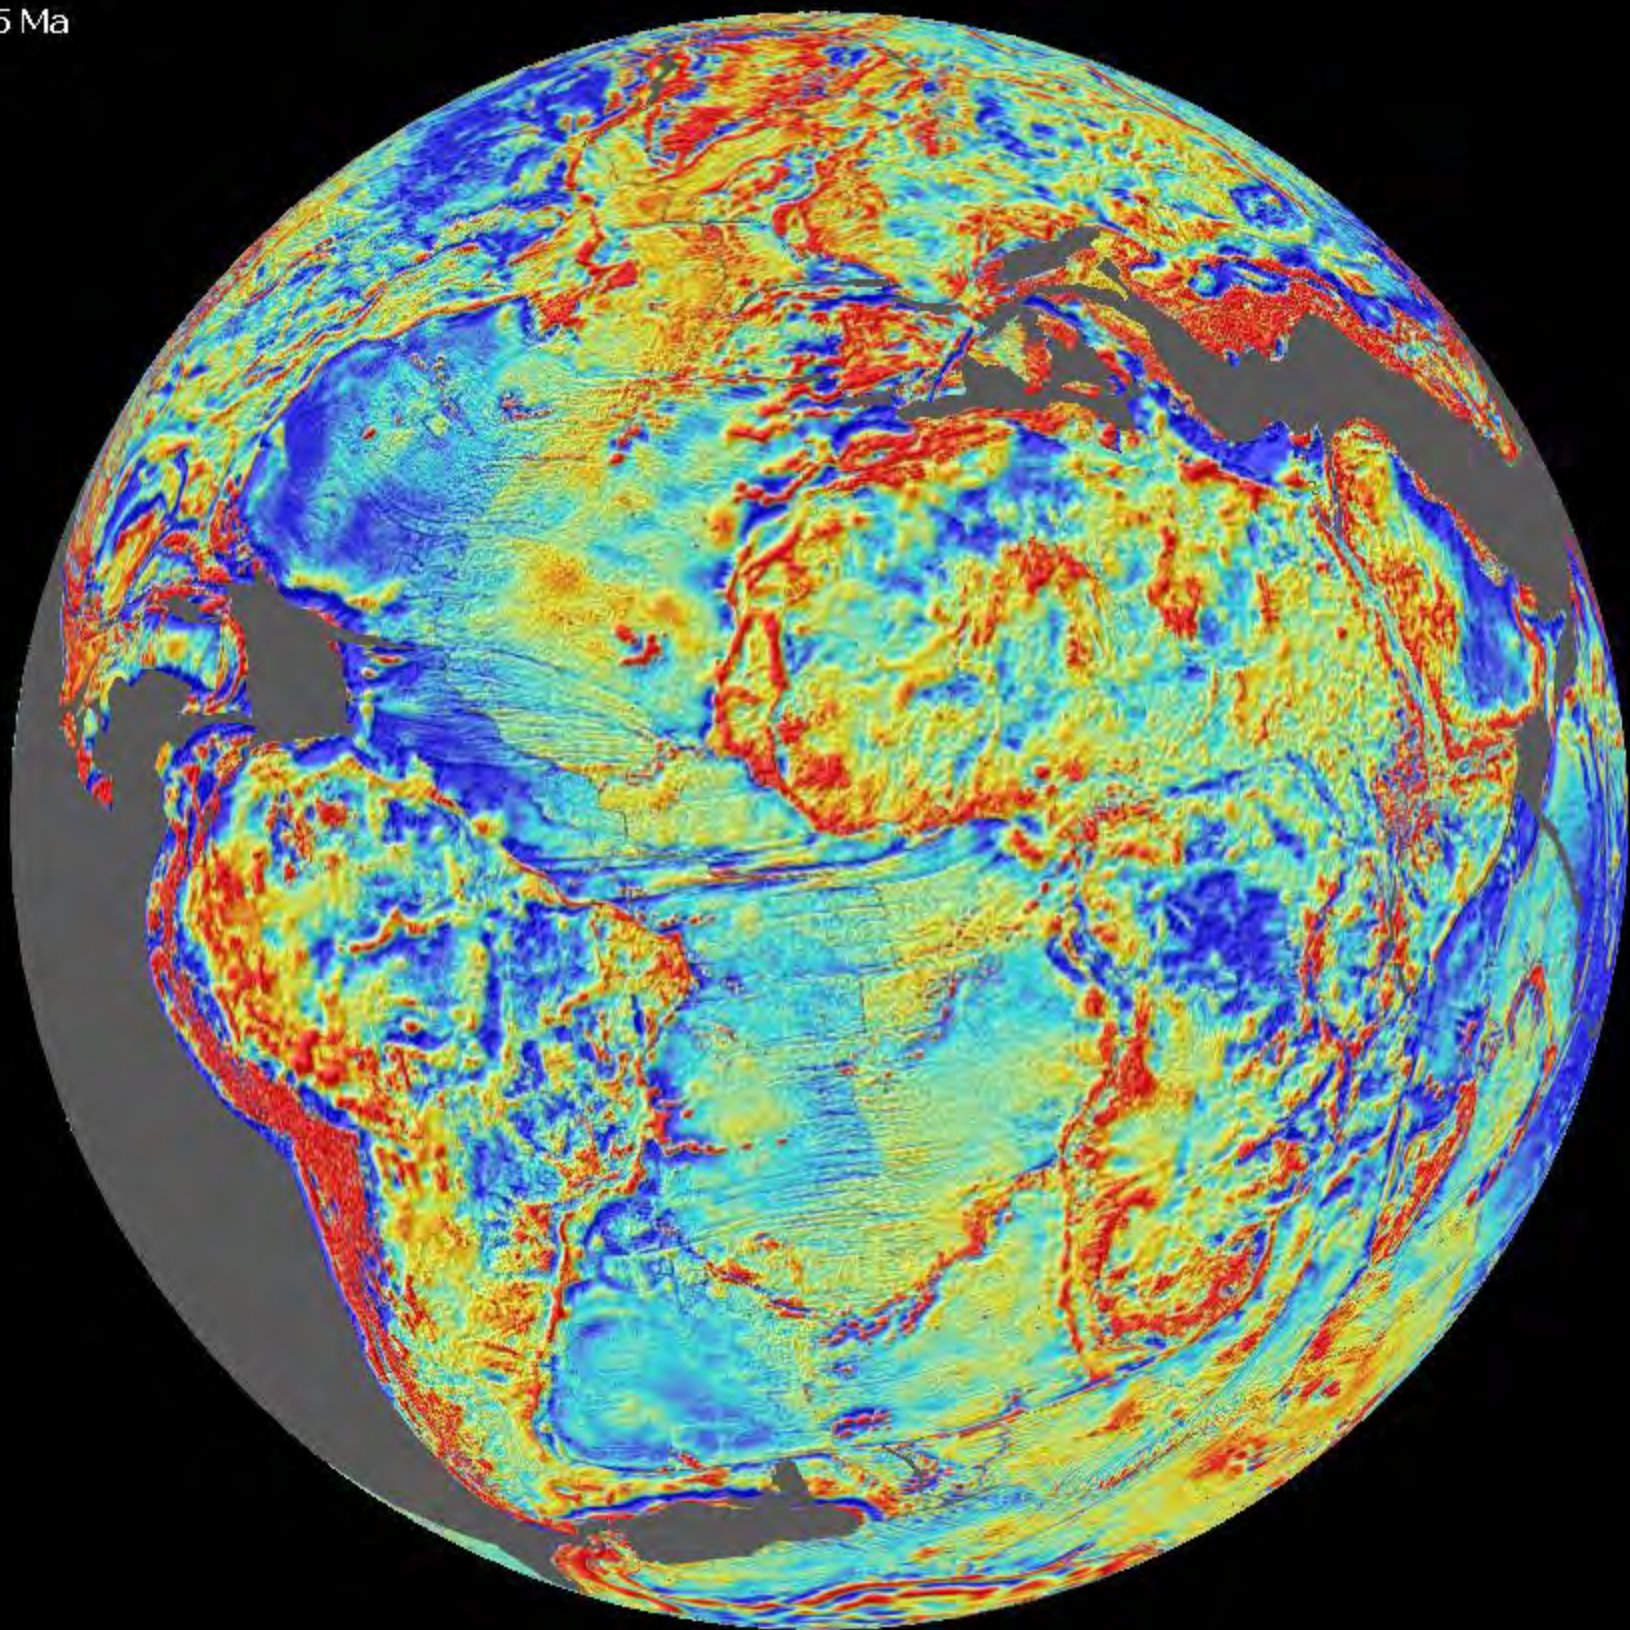



50 Ma

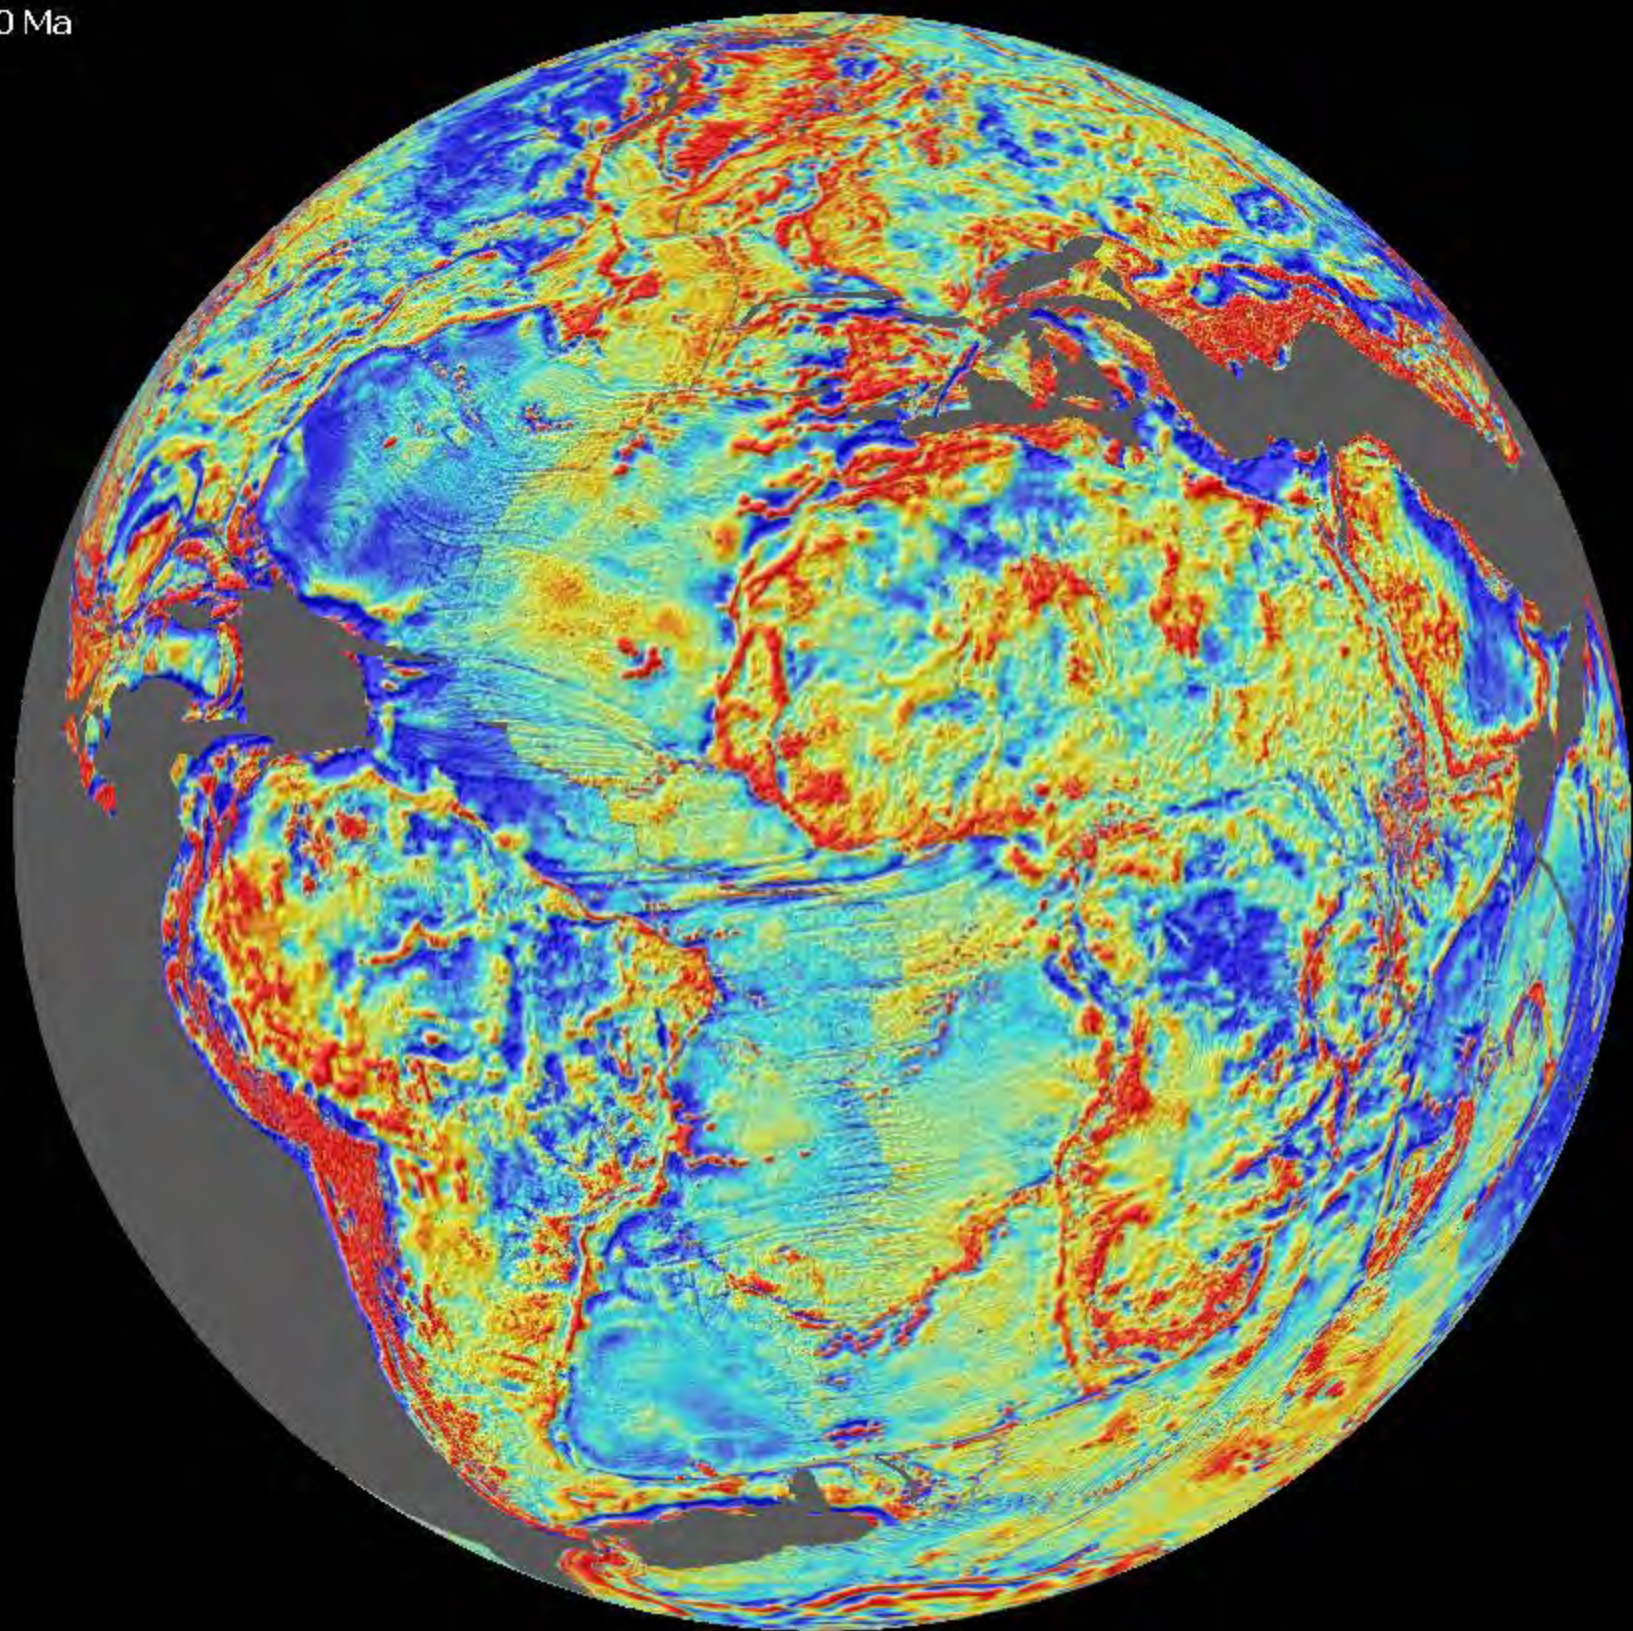



55 Ma

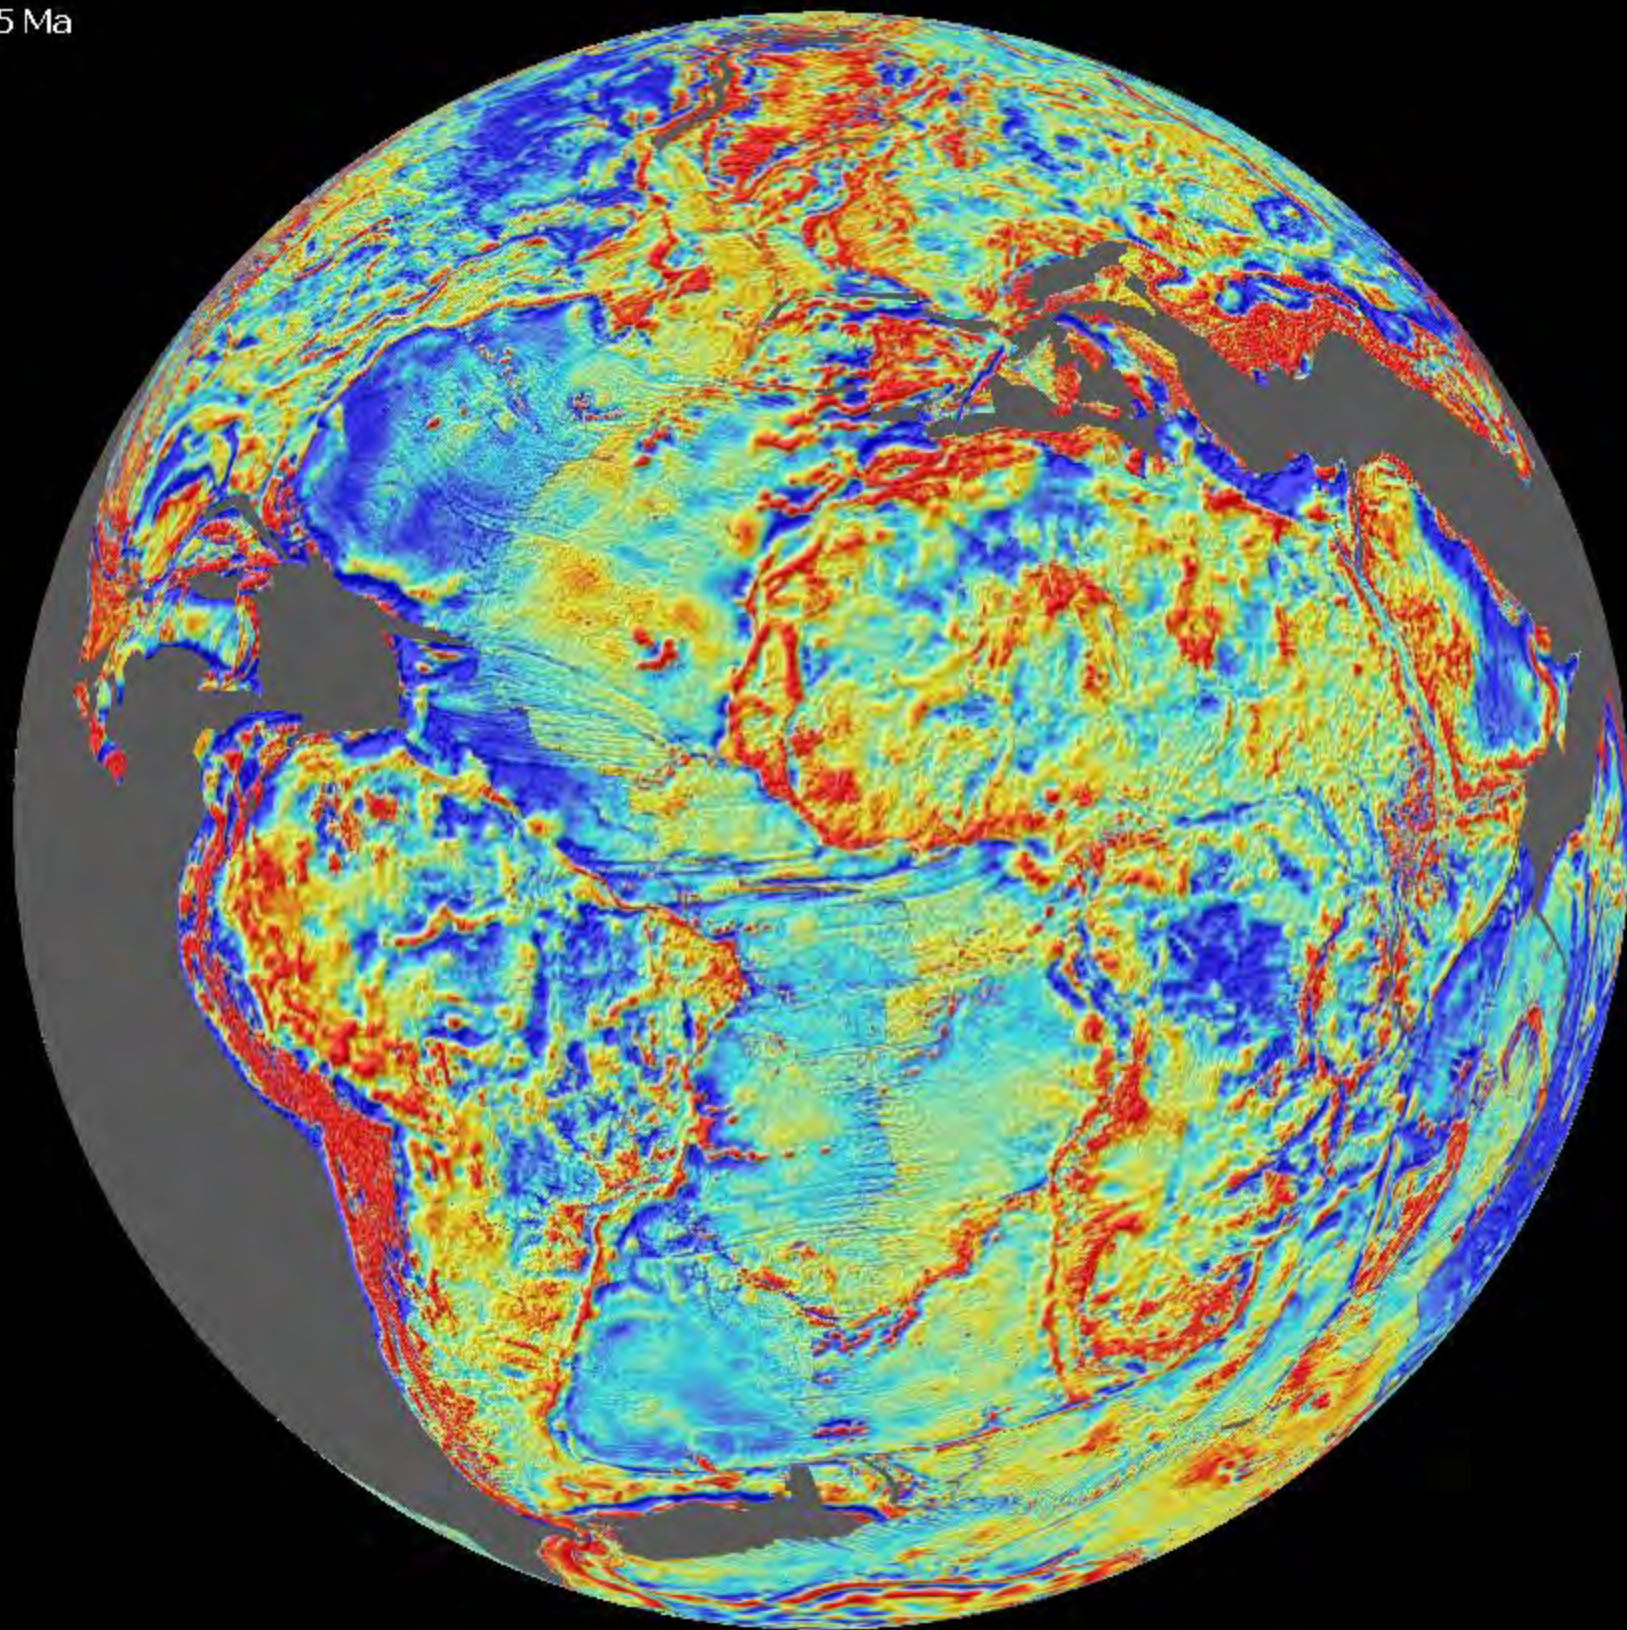



60 Ma

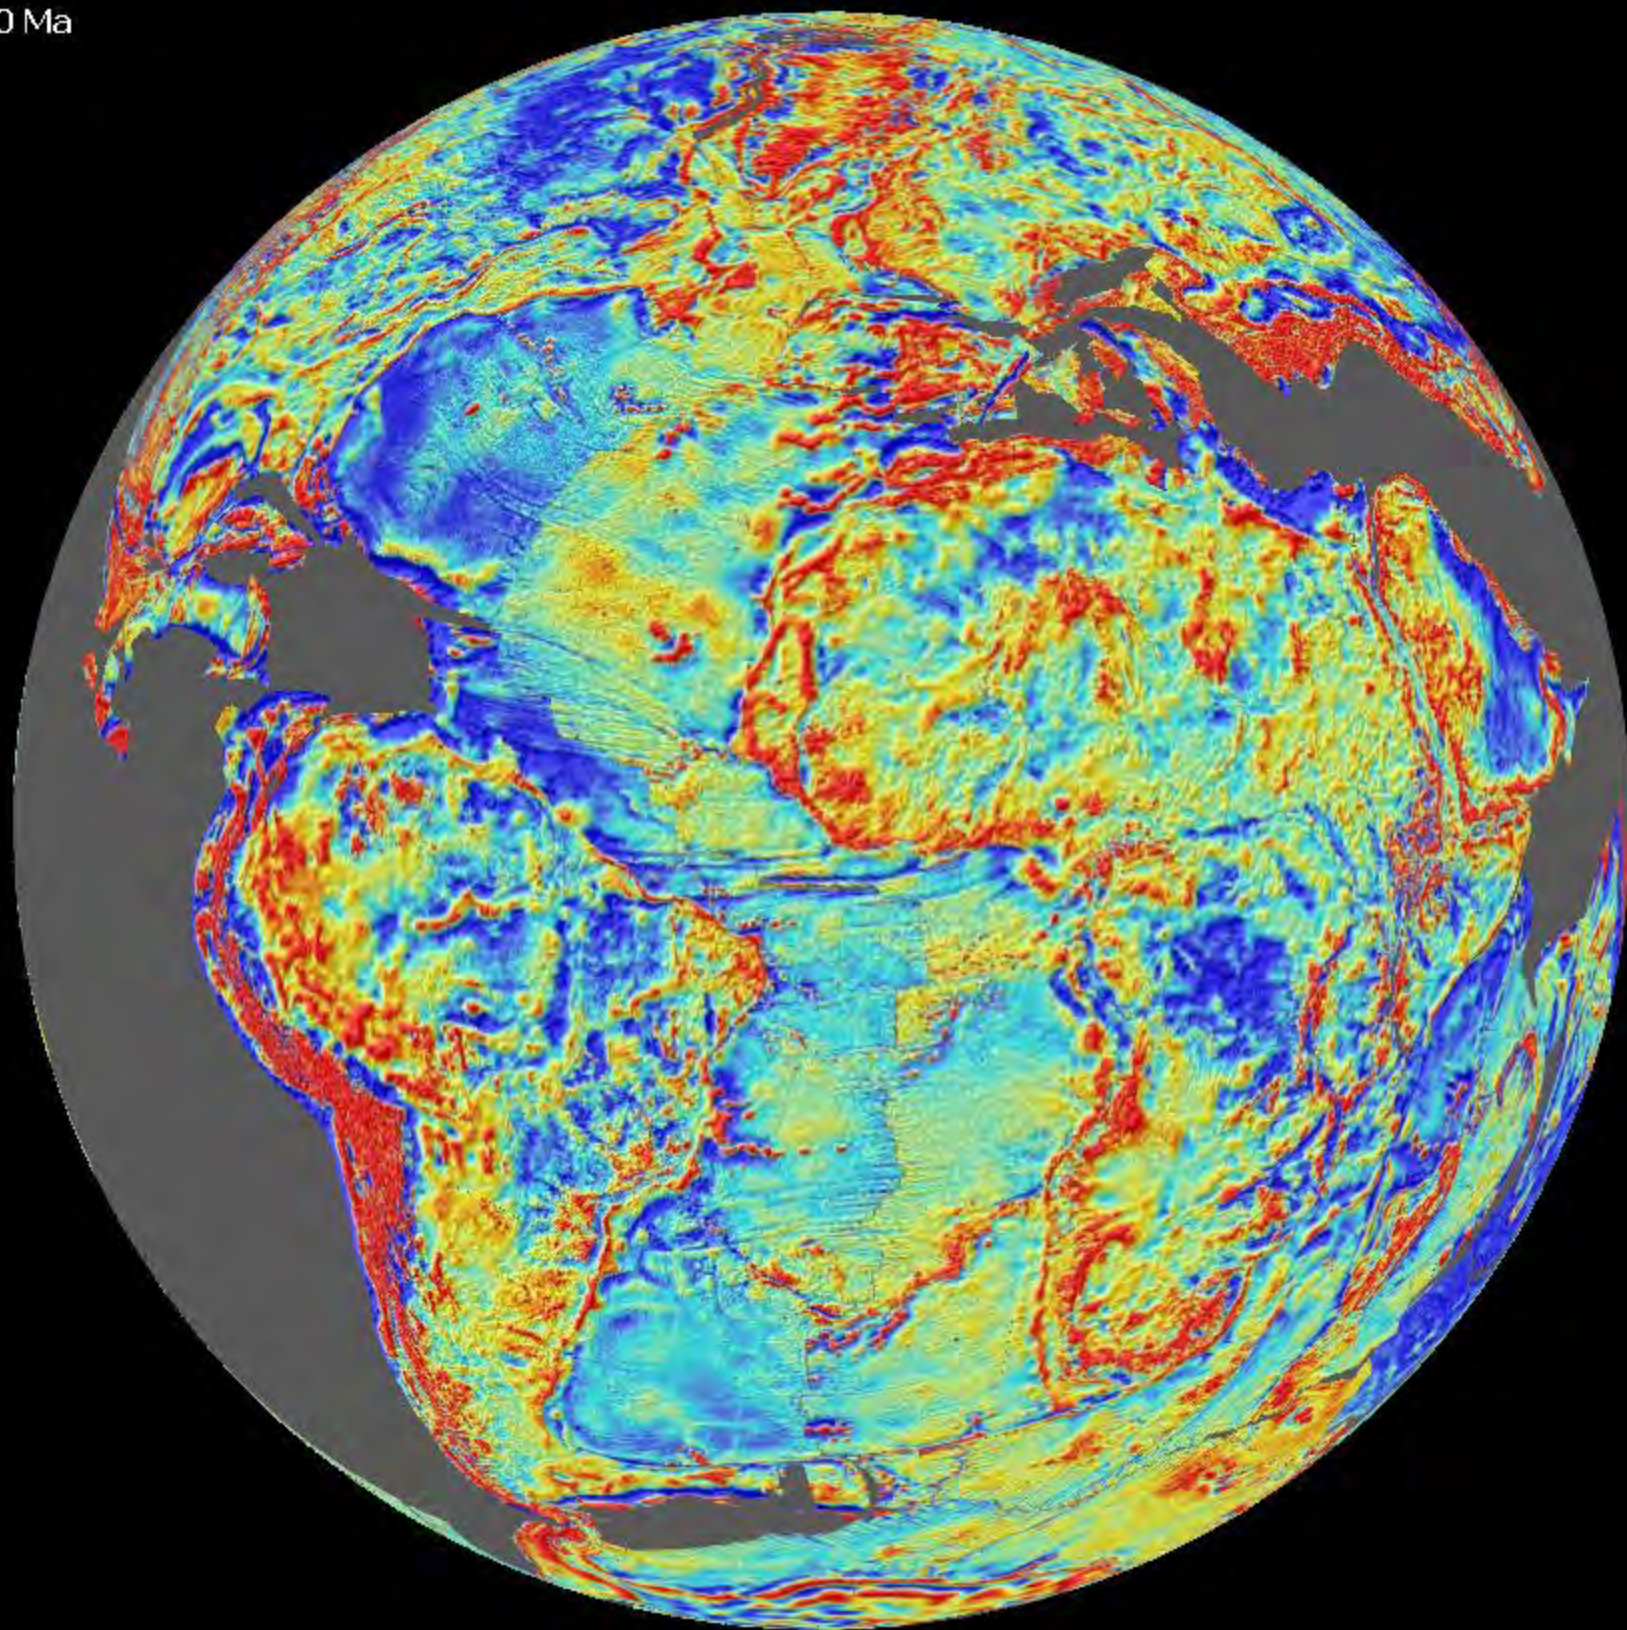



65 Ma

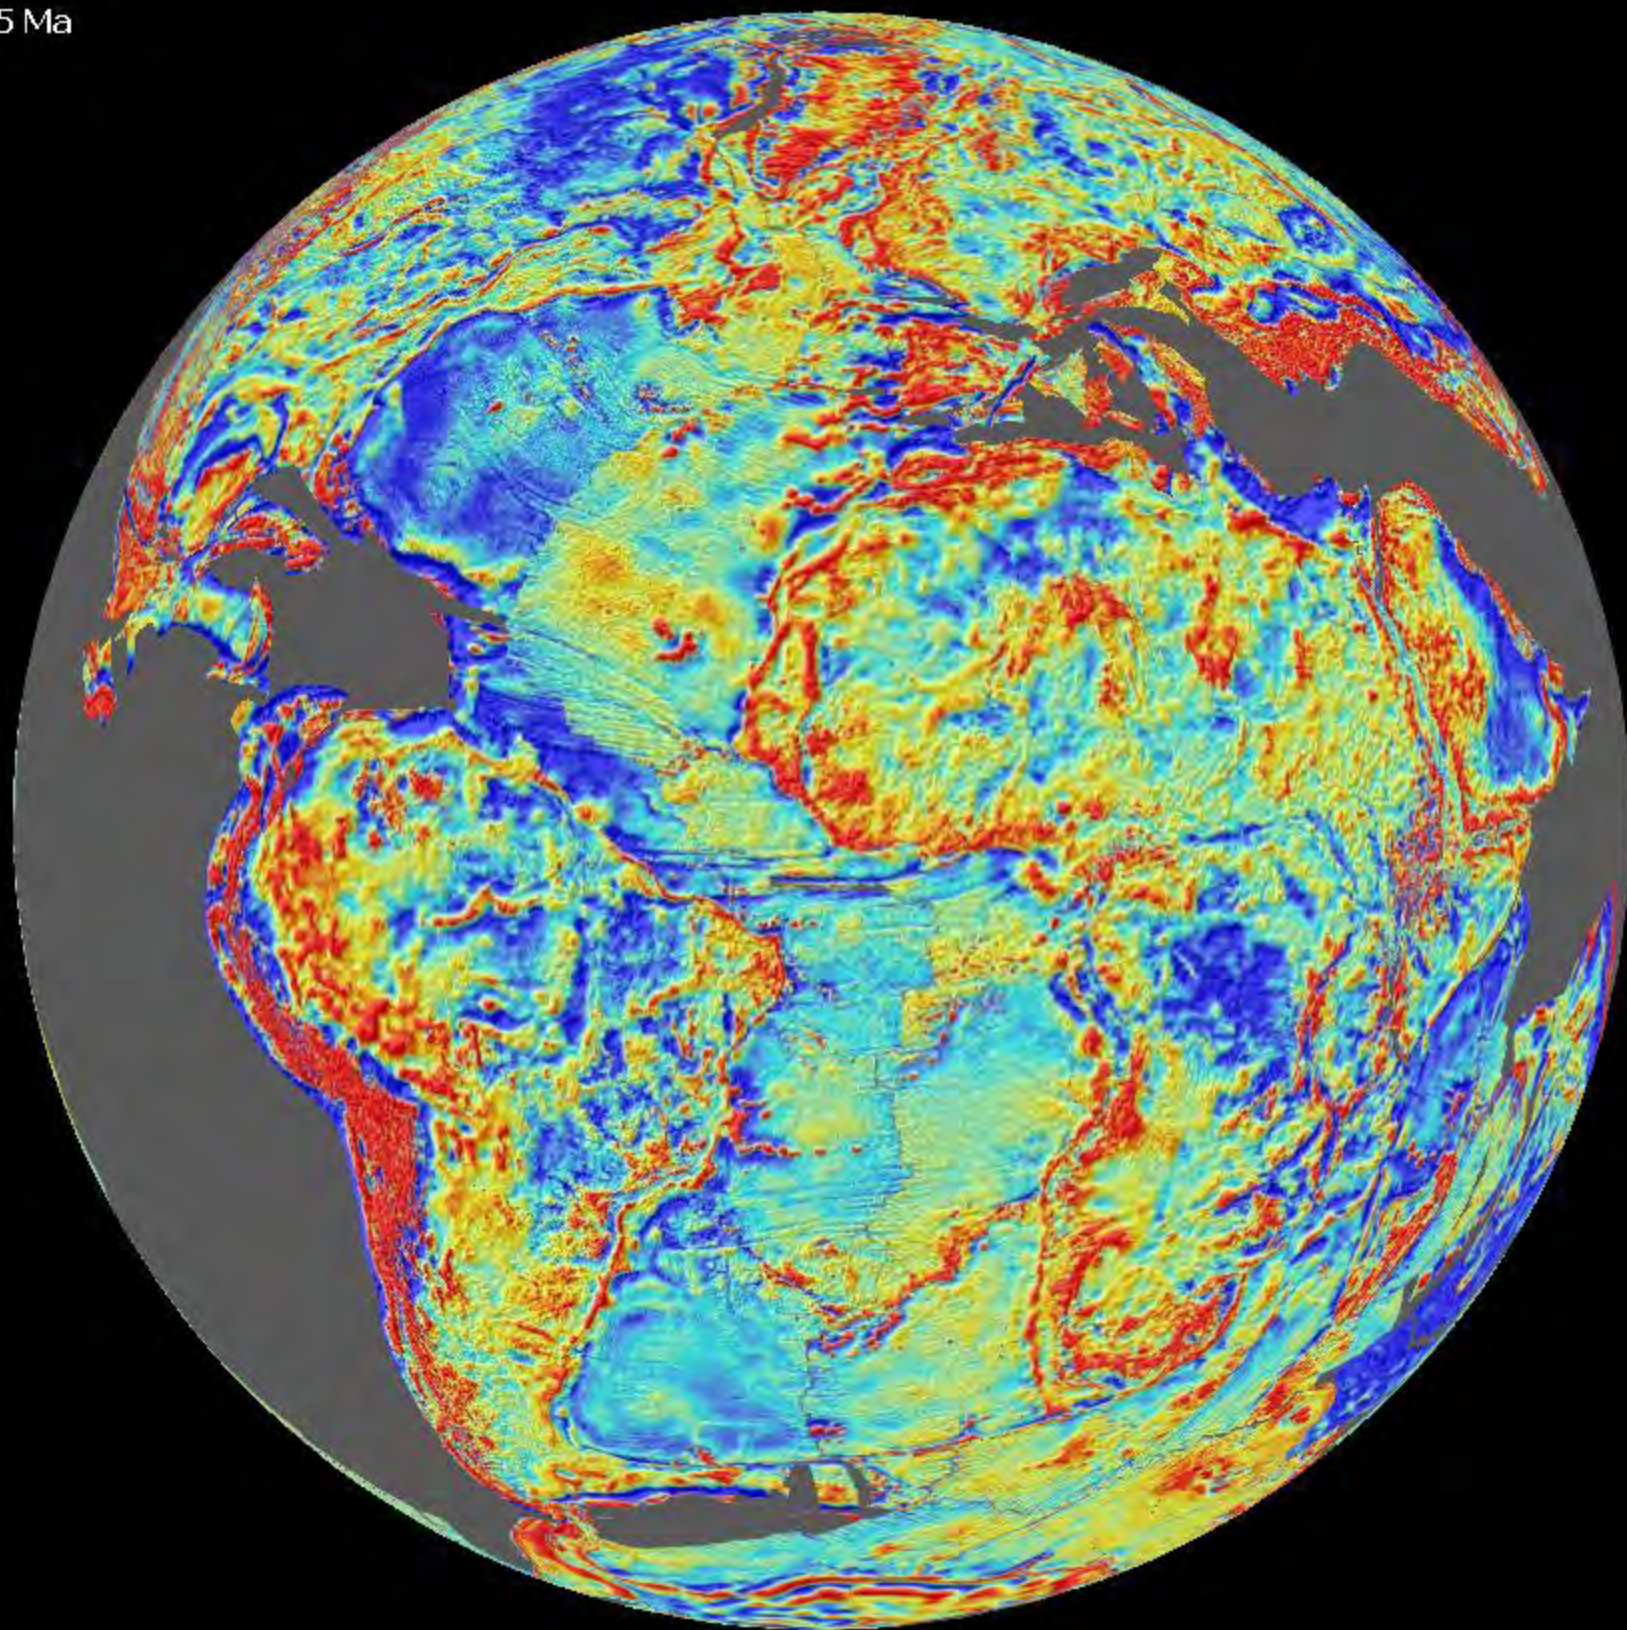



70 Ma

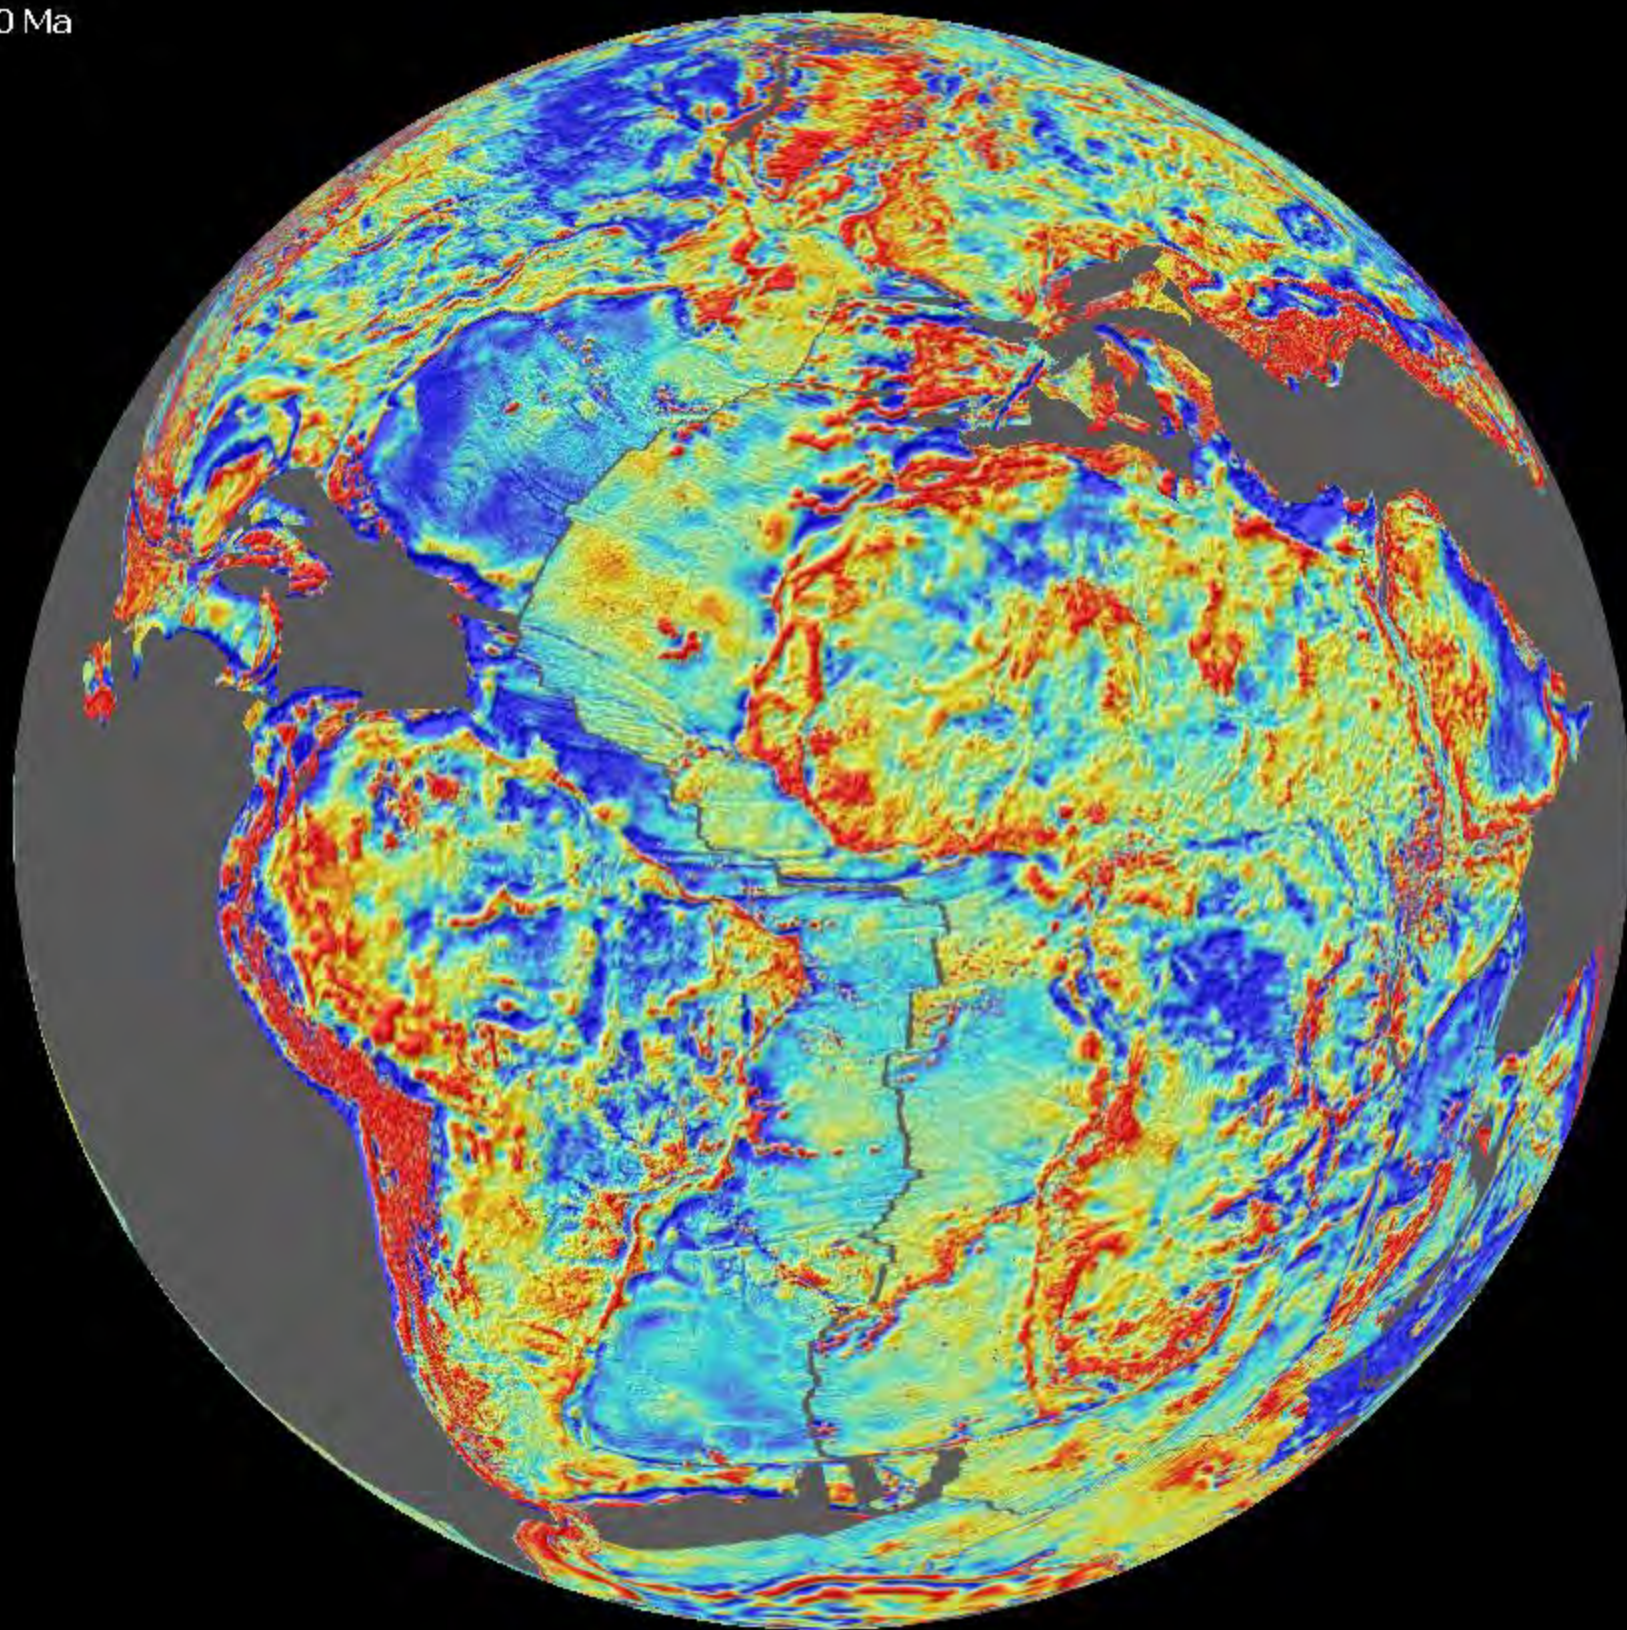



75 Ma

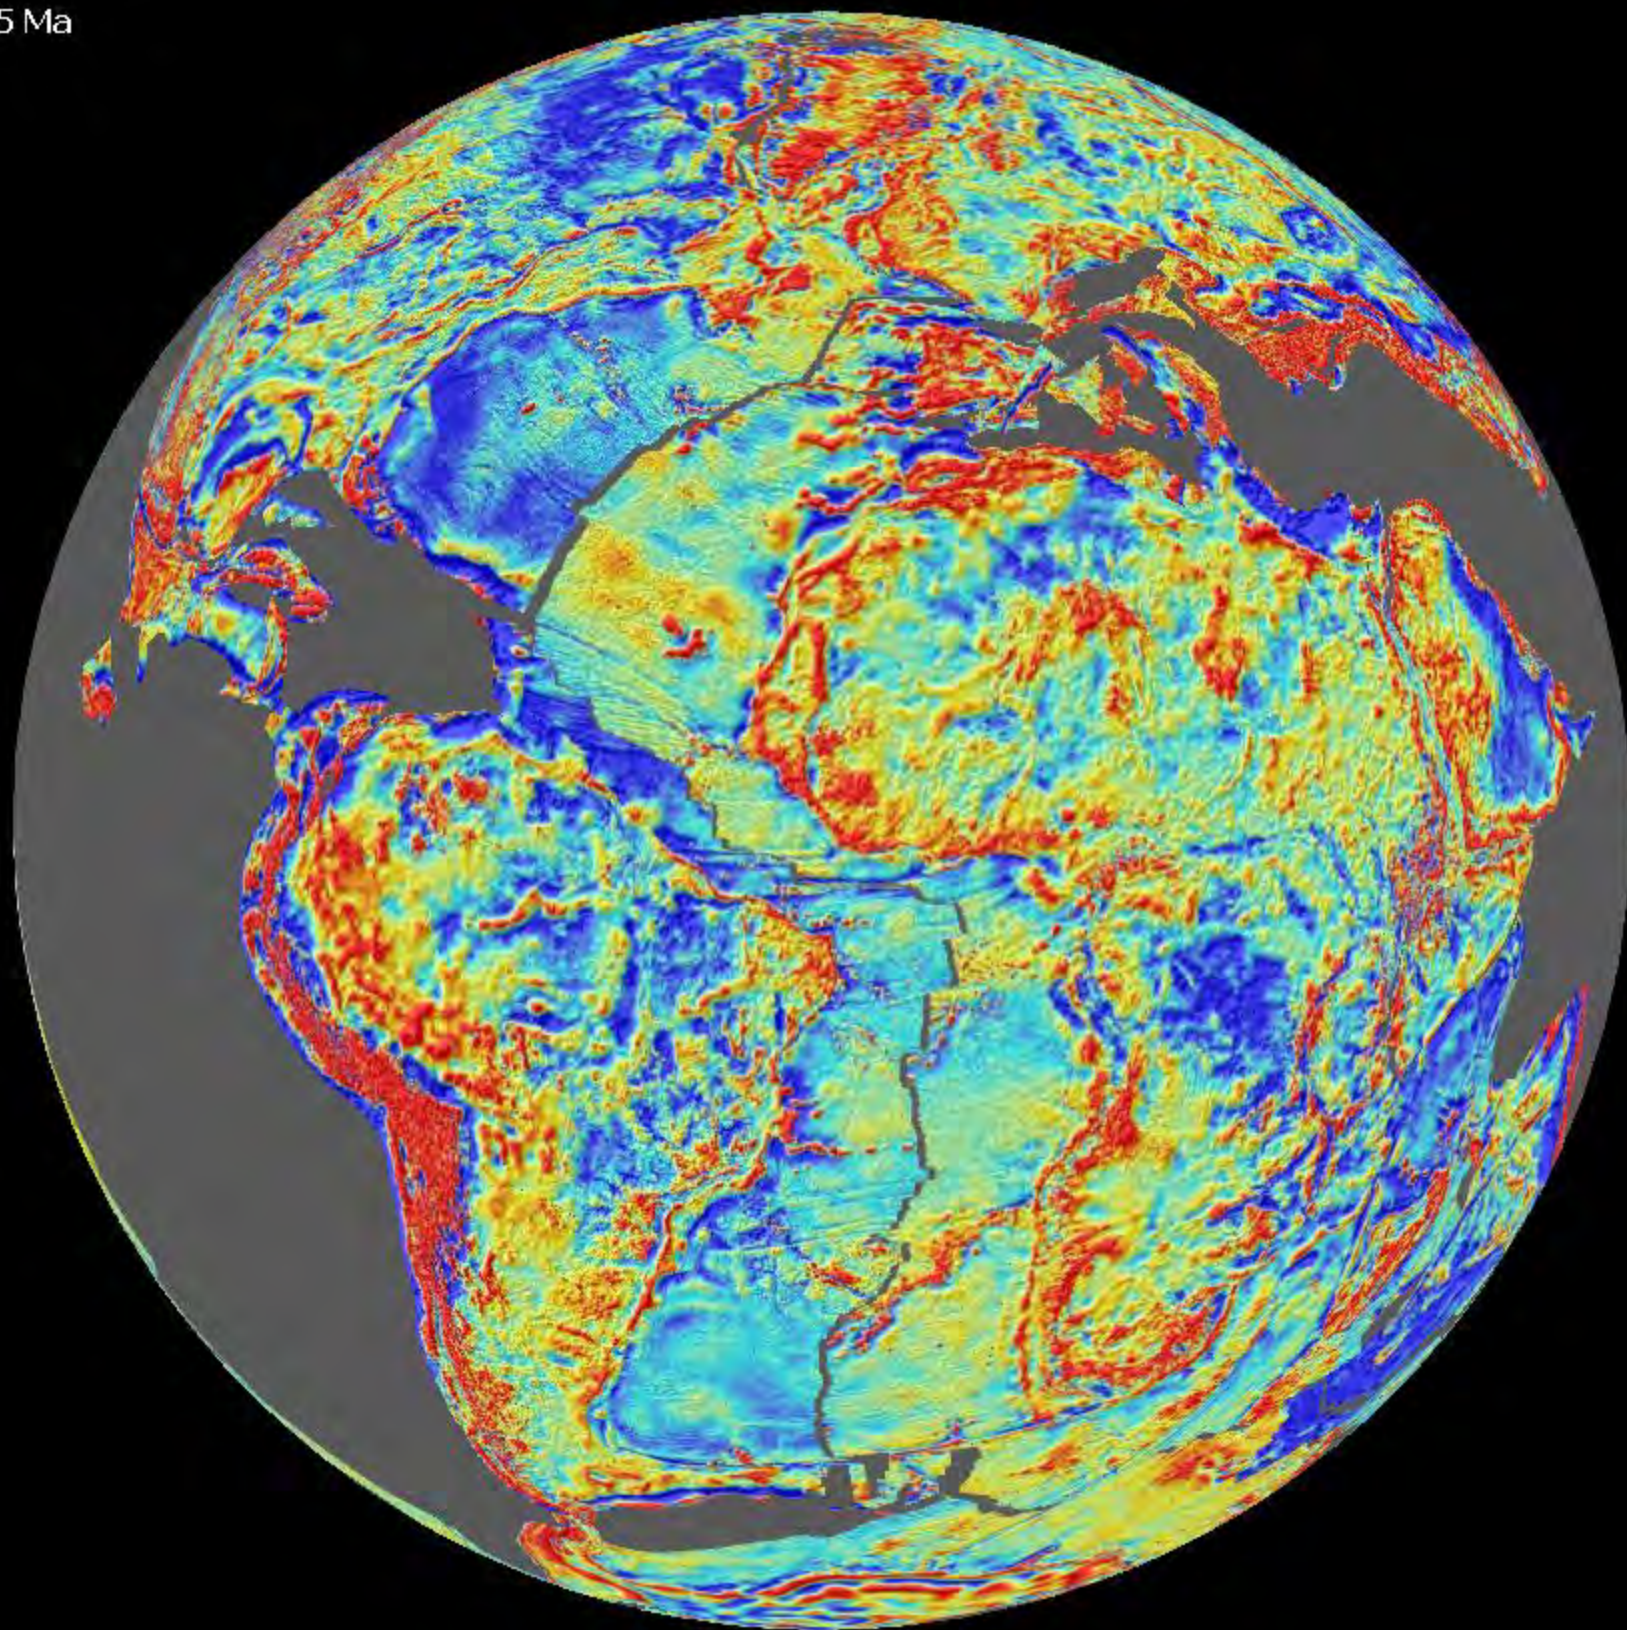



80 Ma

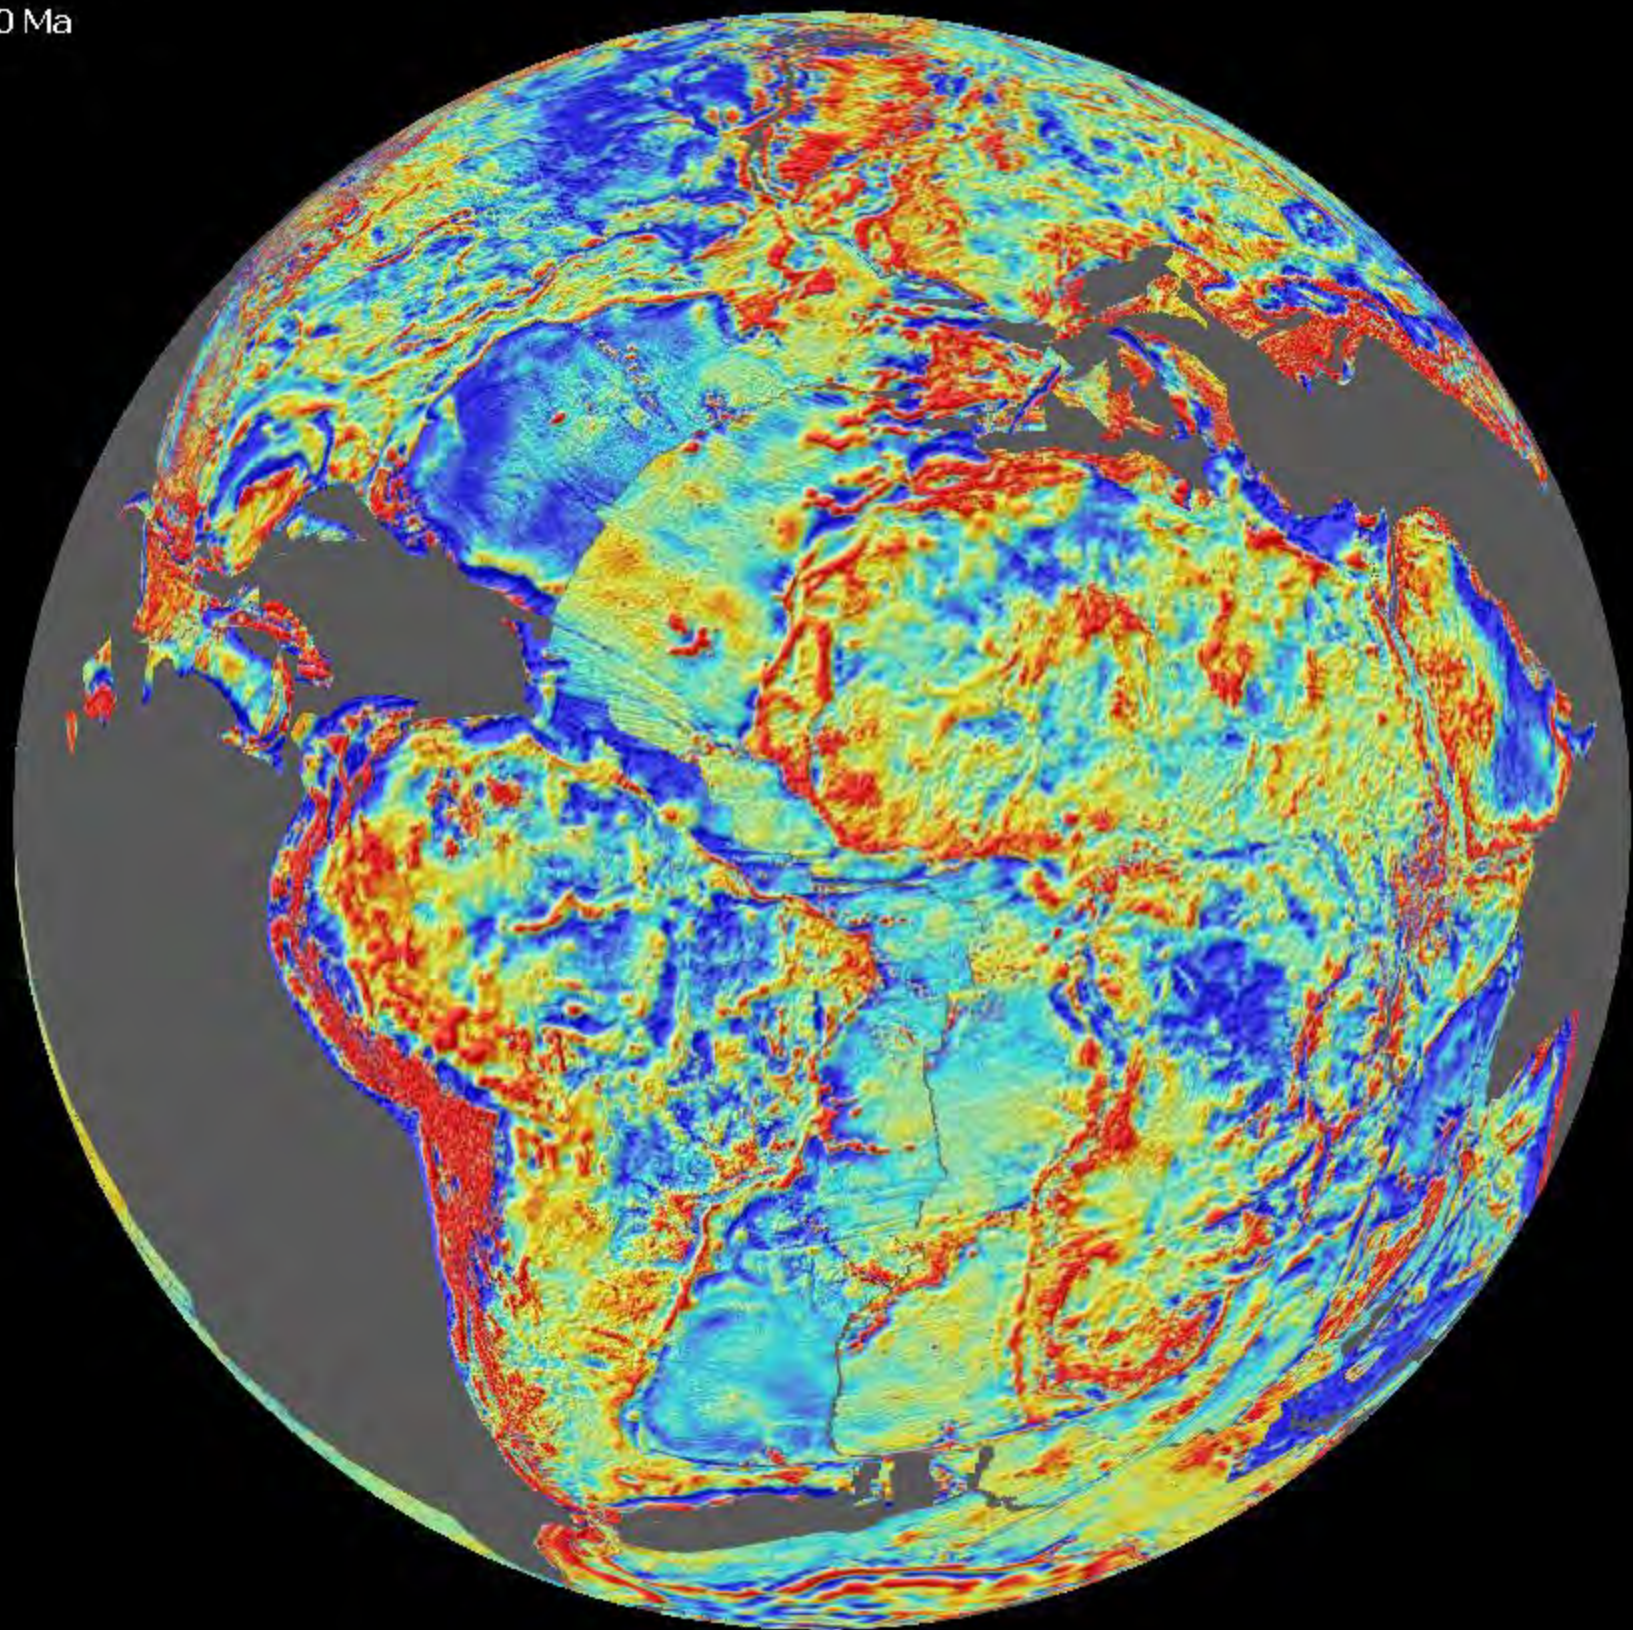



85 Ma

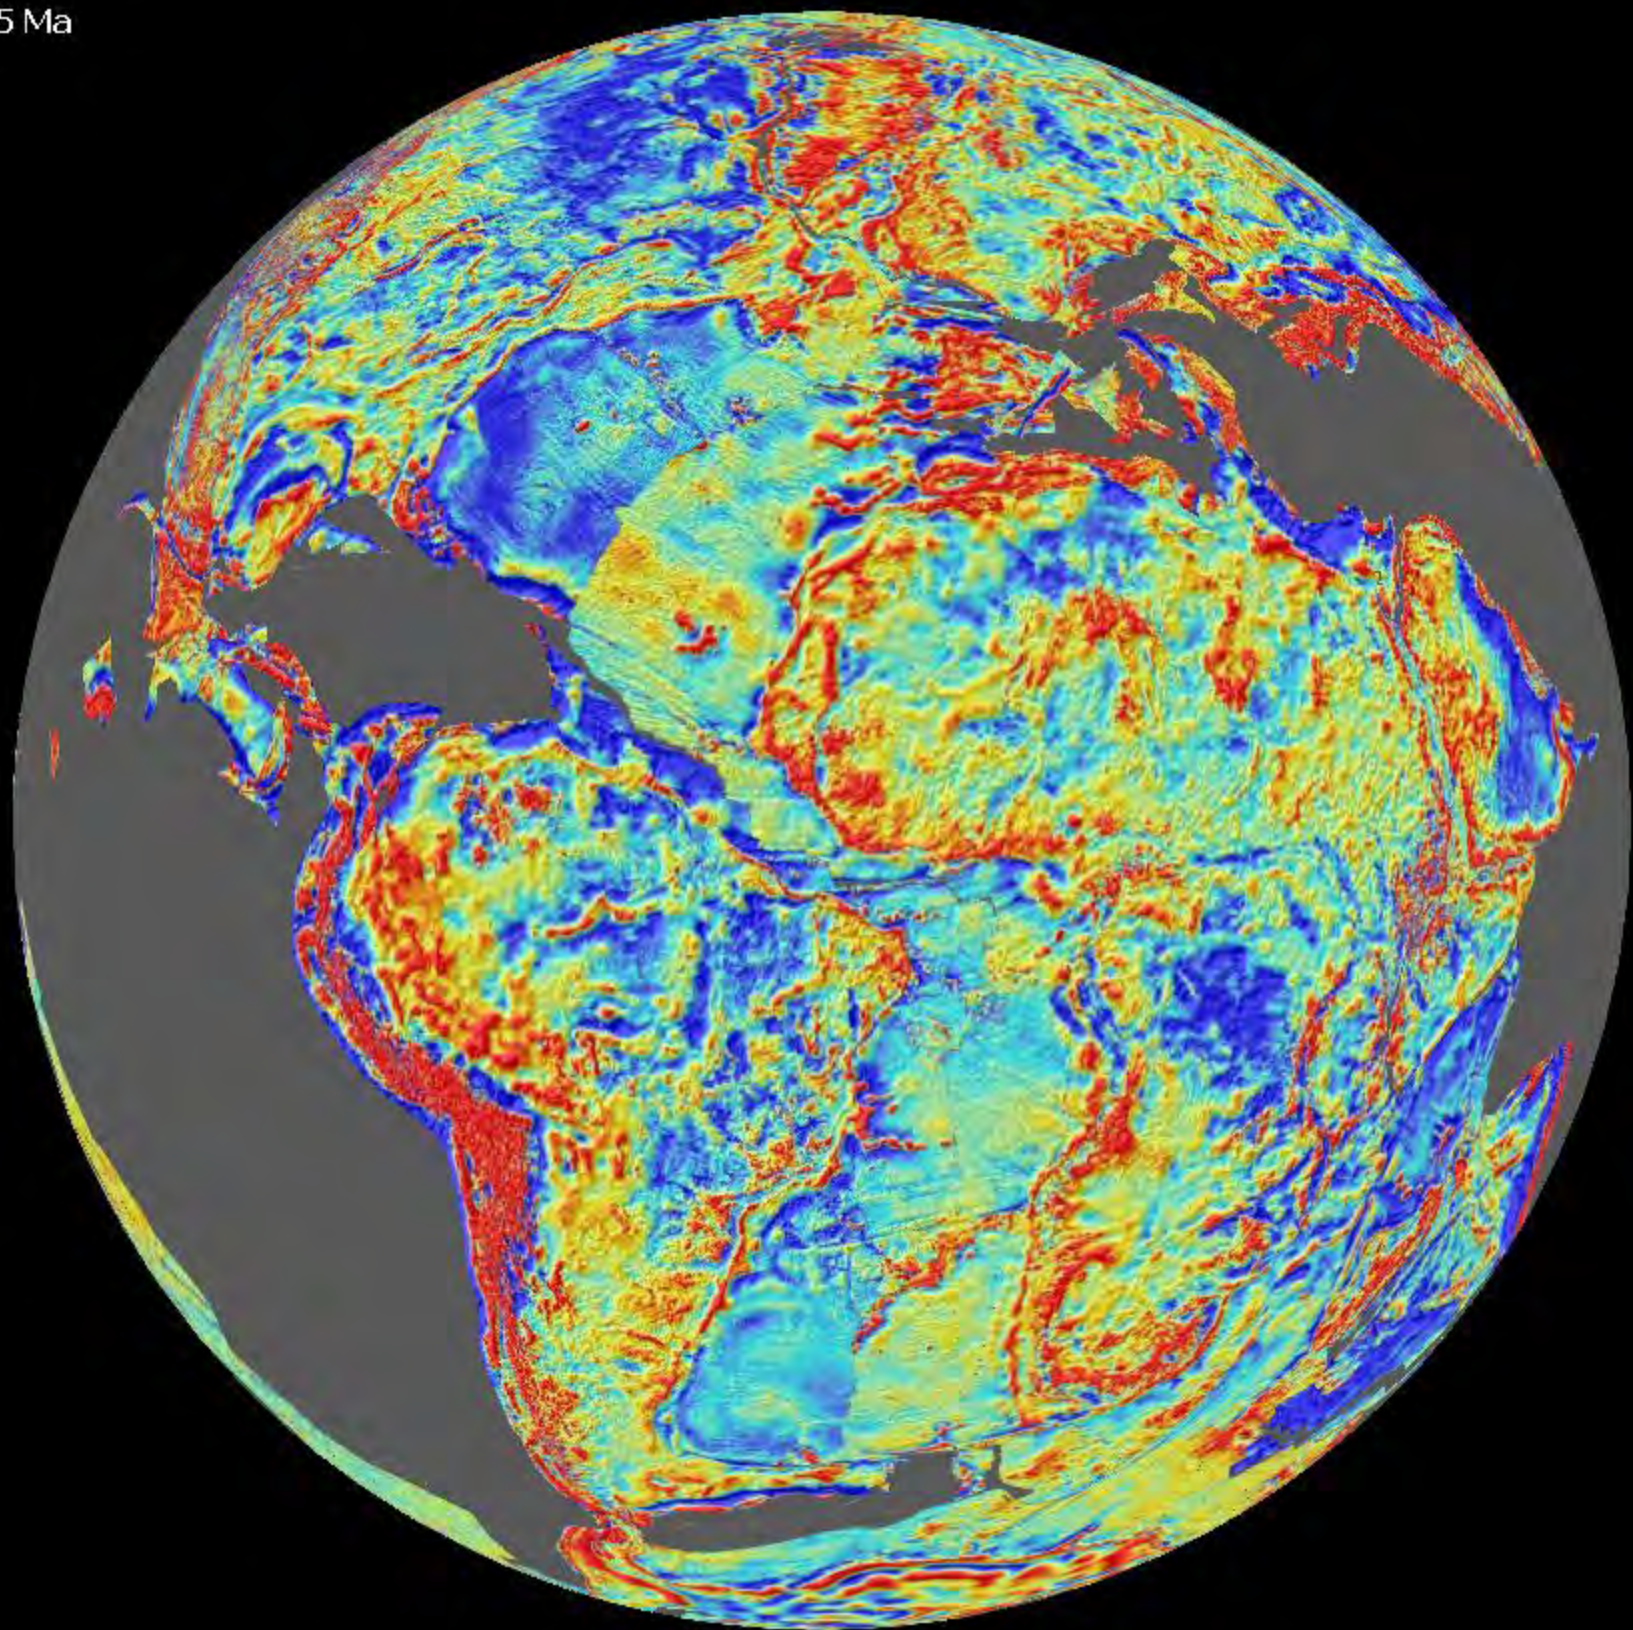



90 Ma

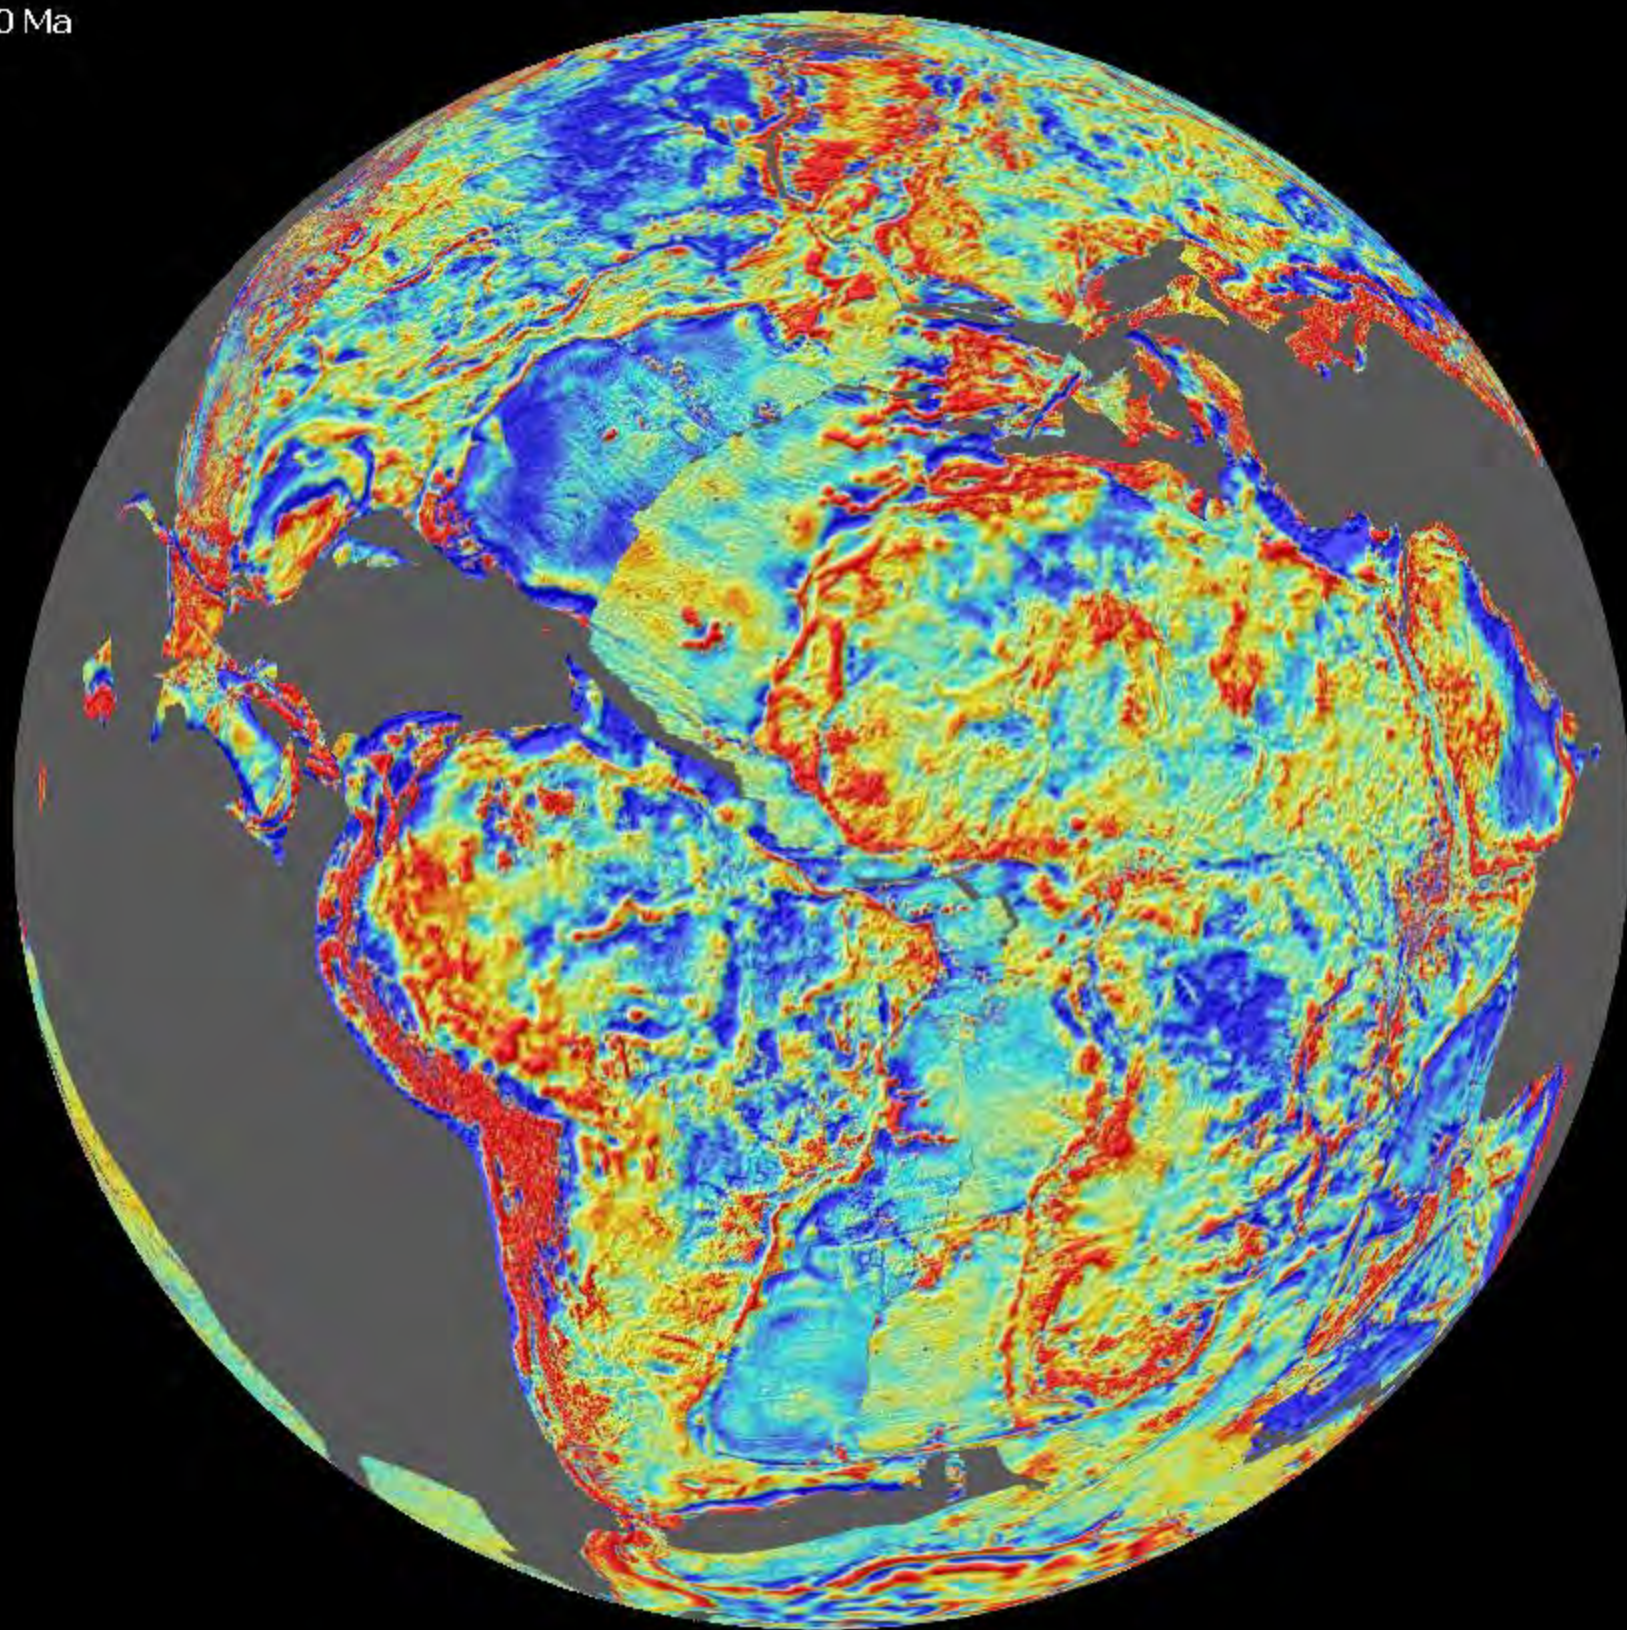



95 Ma

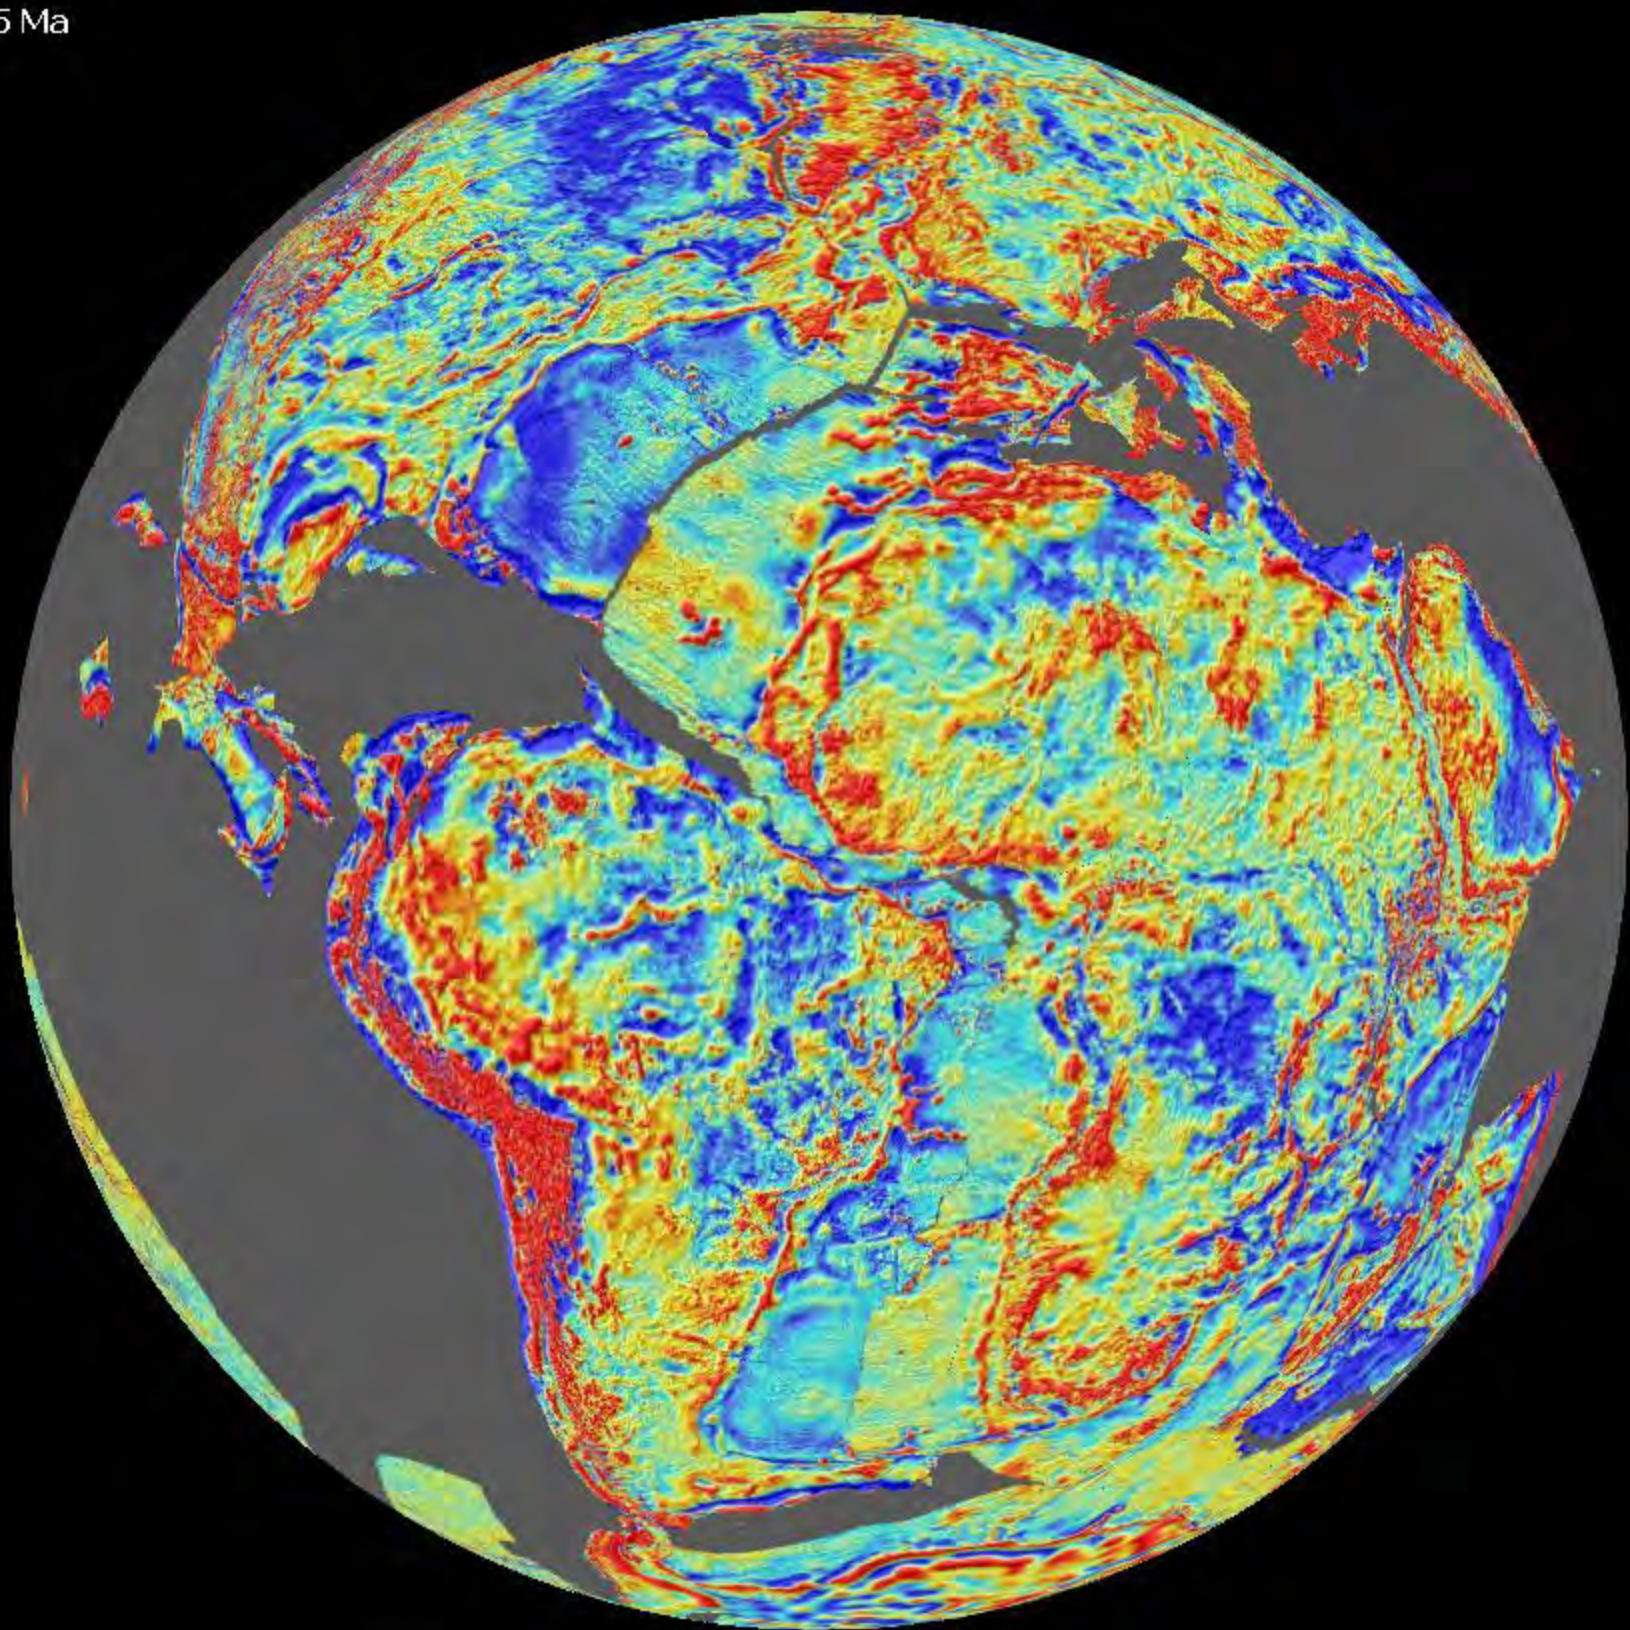



100 Ma

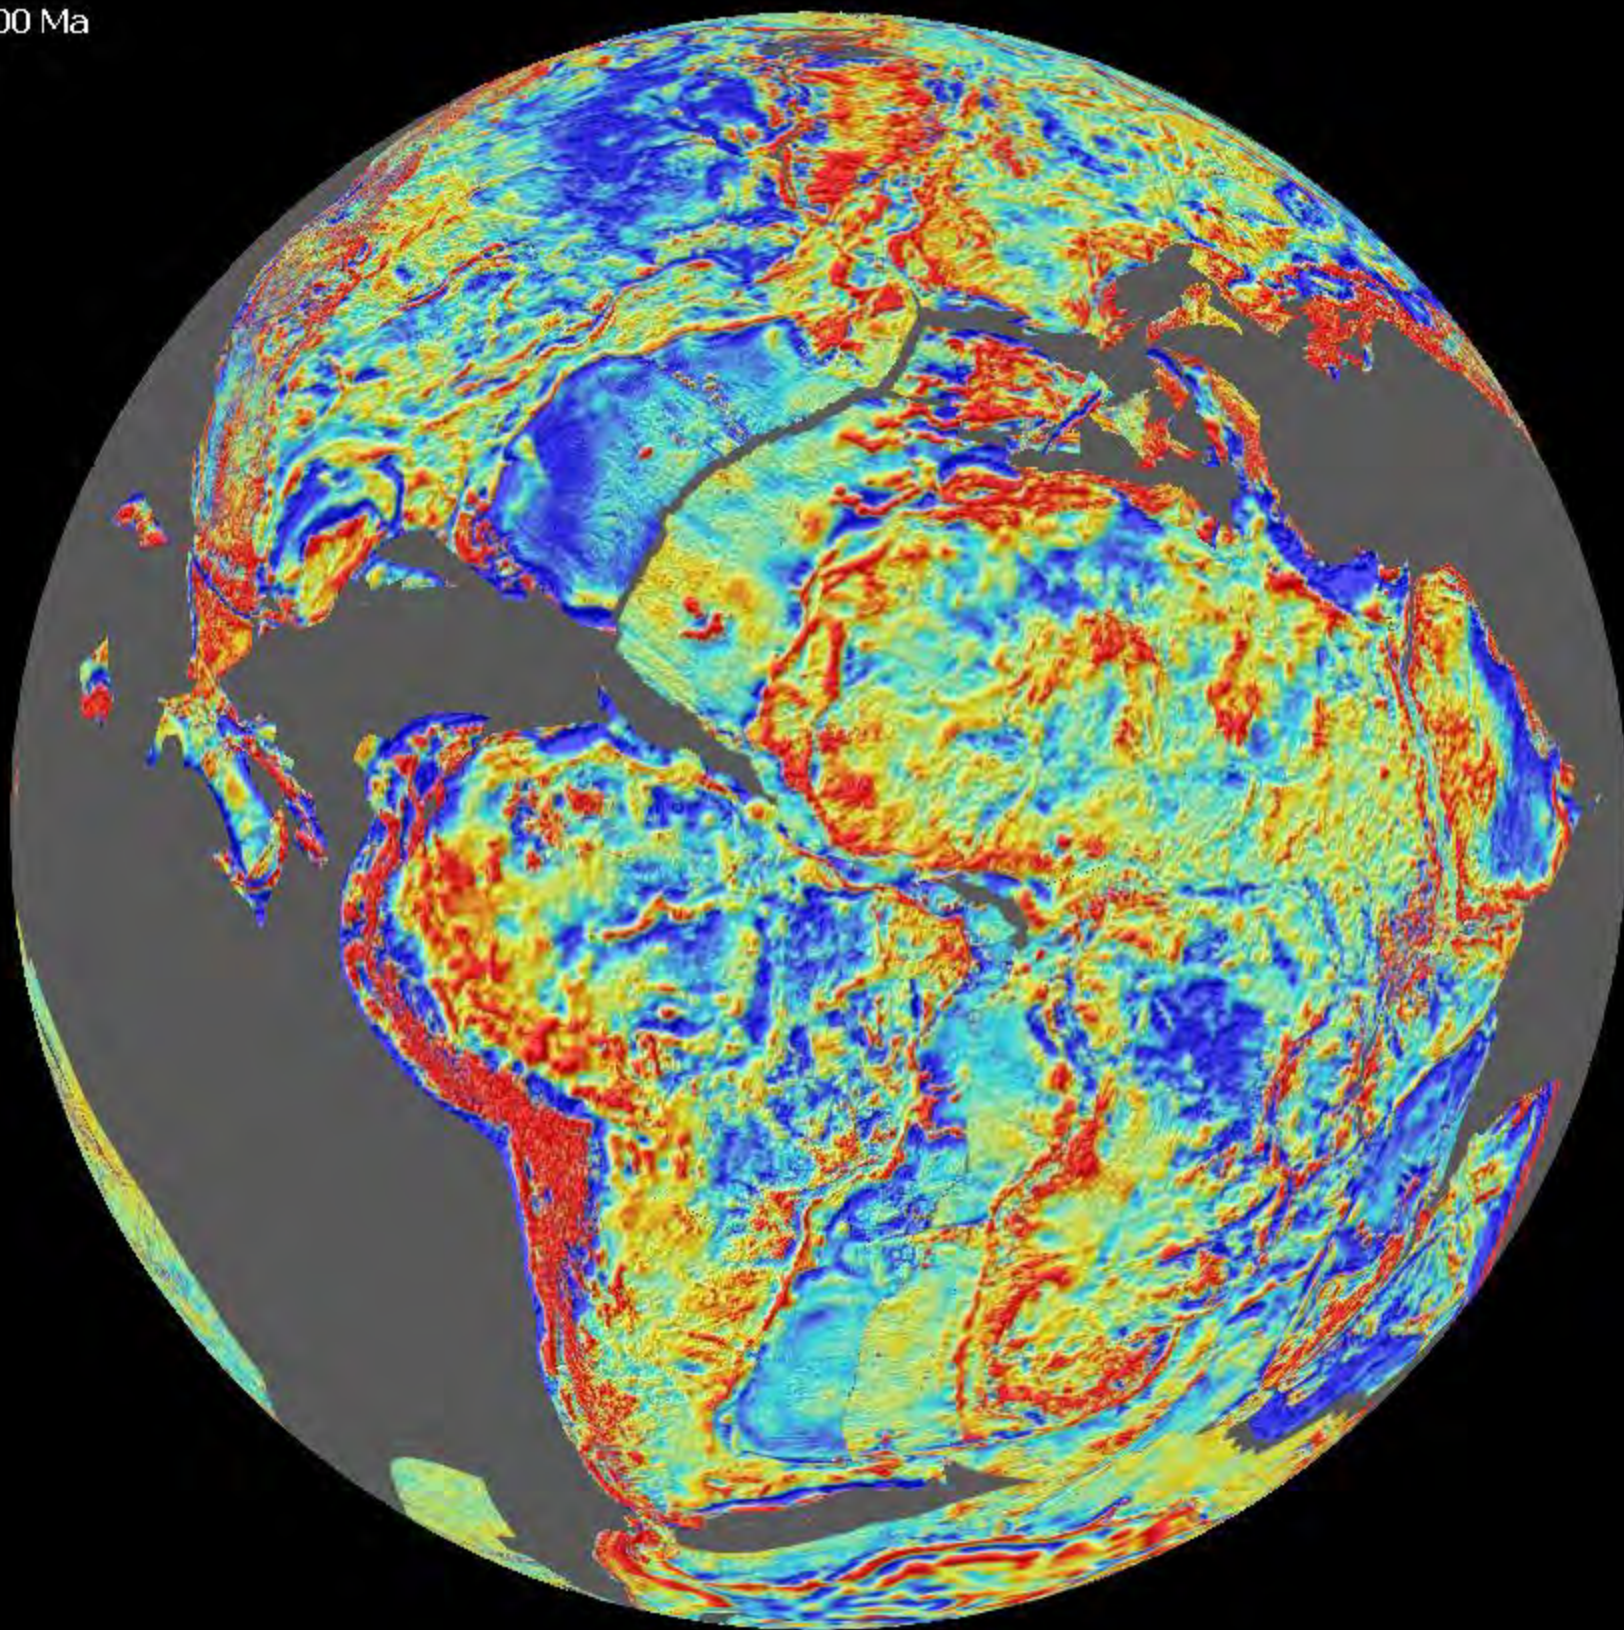



105 Ma

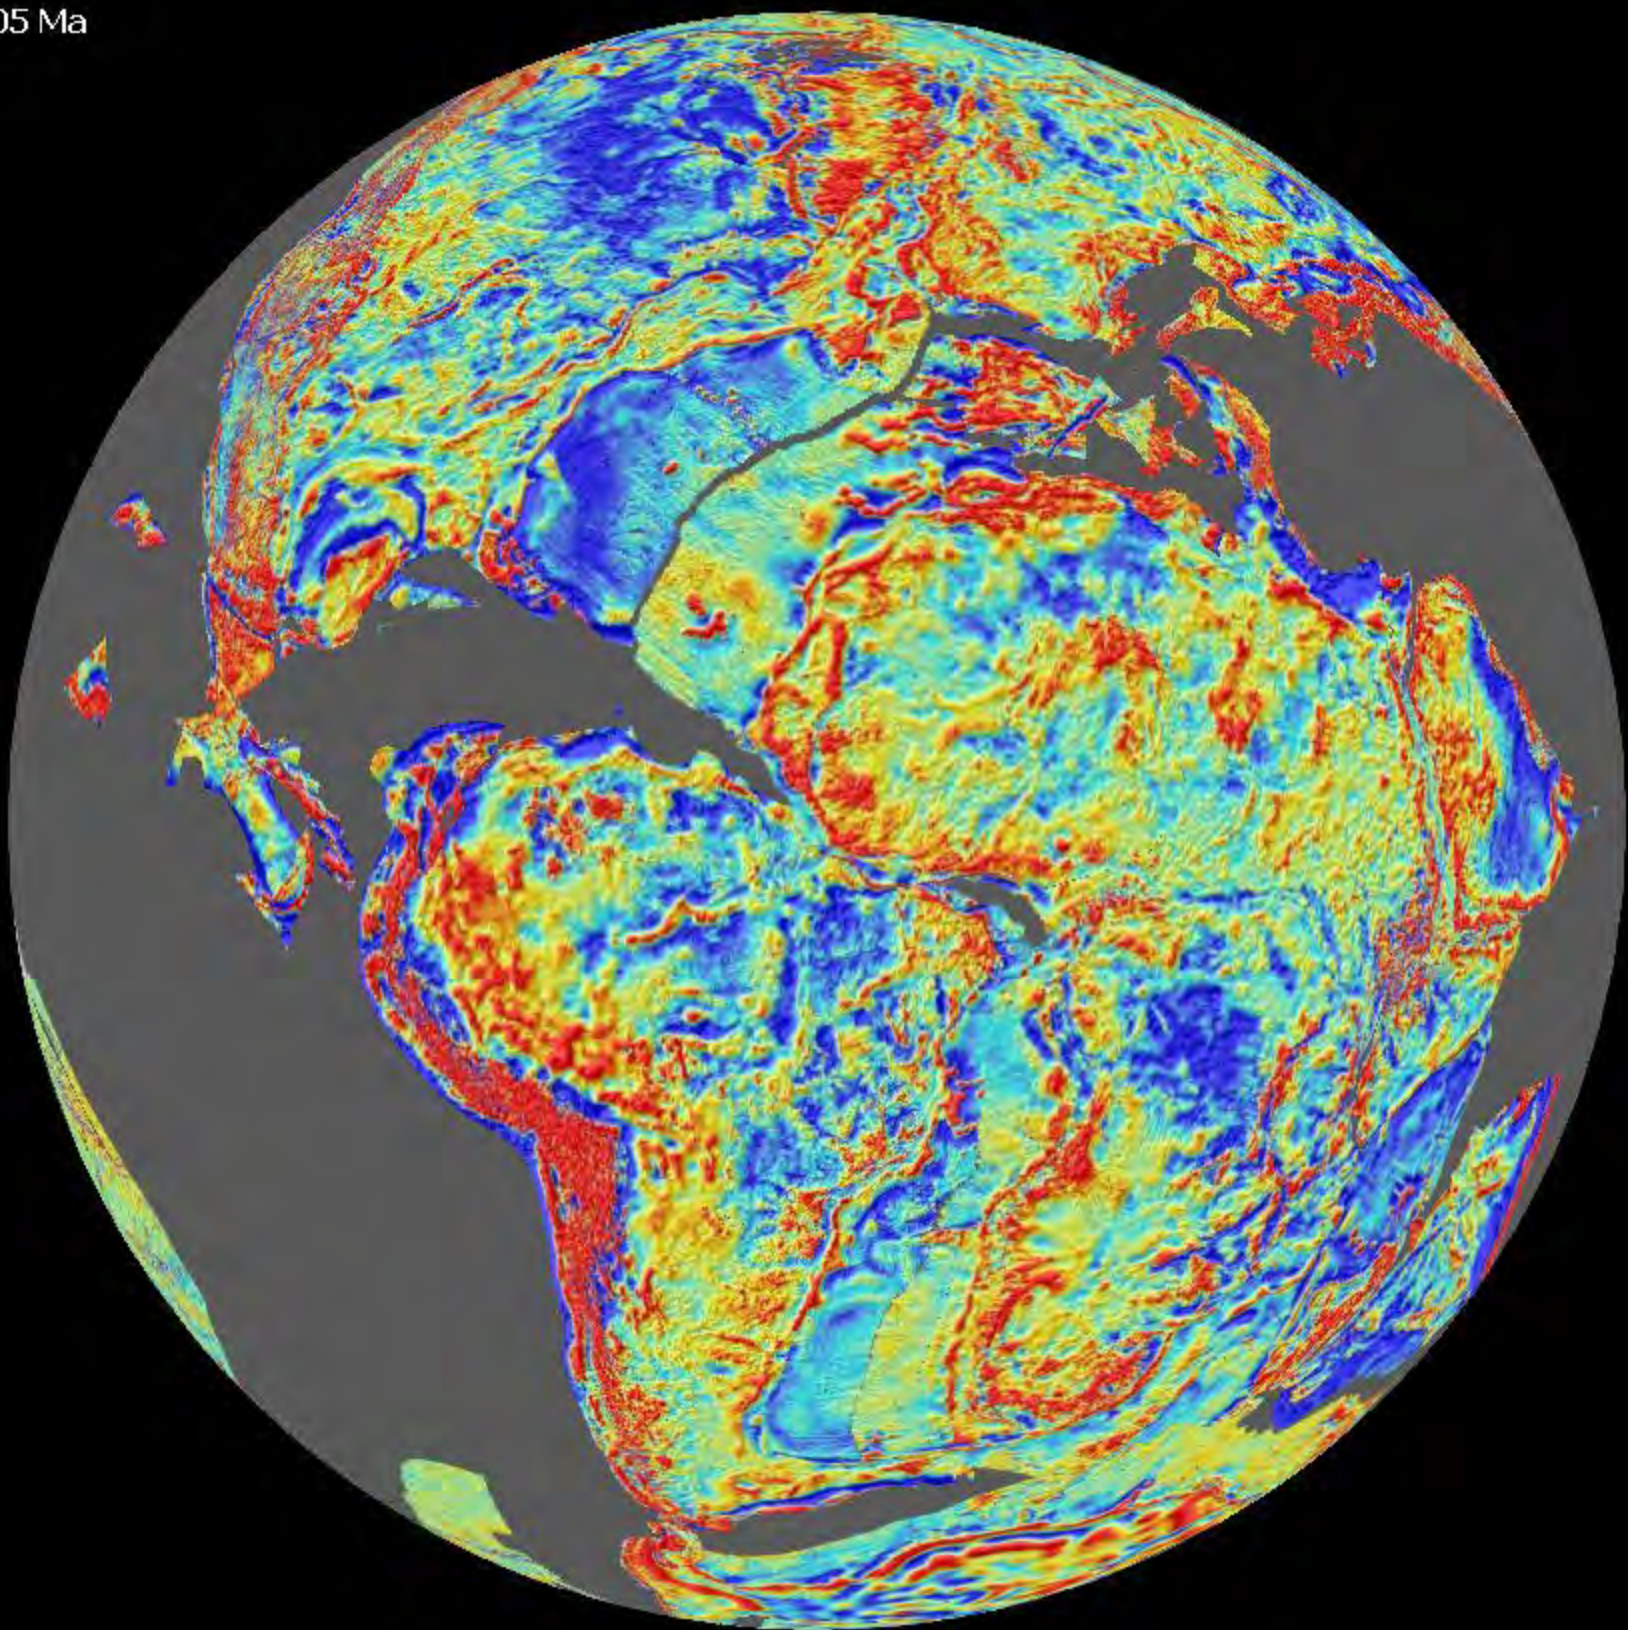



110 Ma

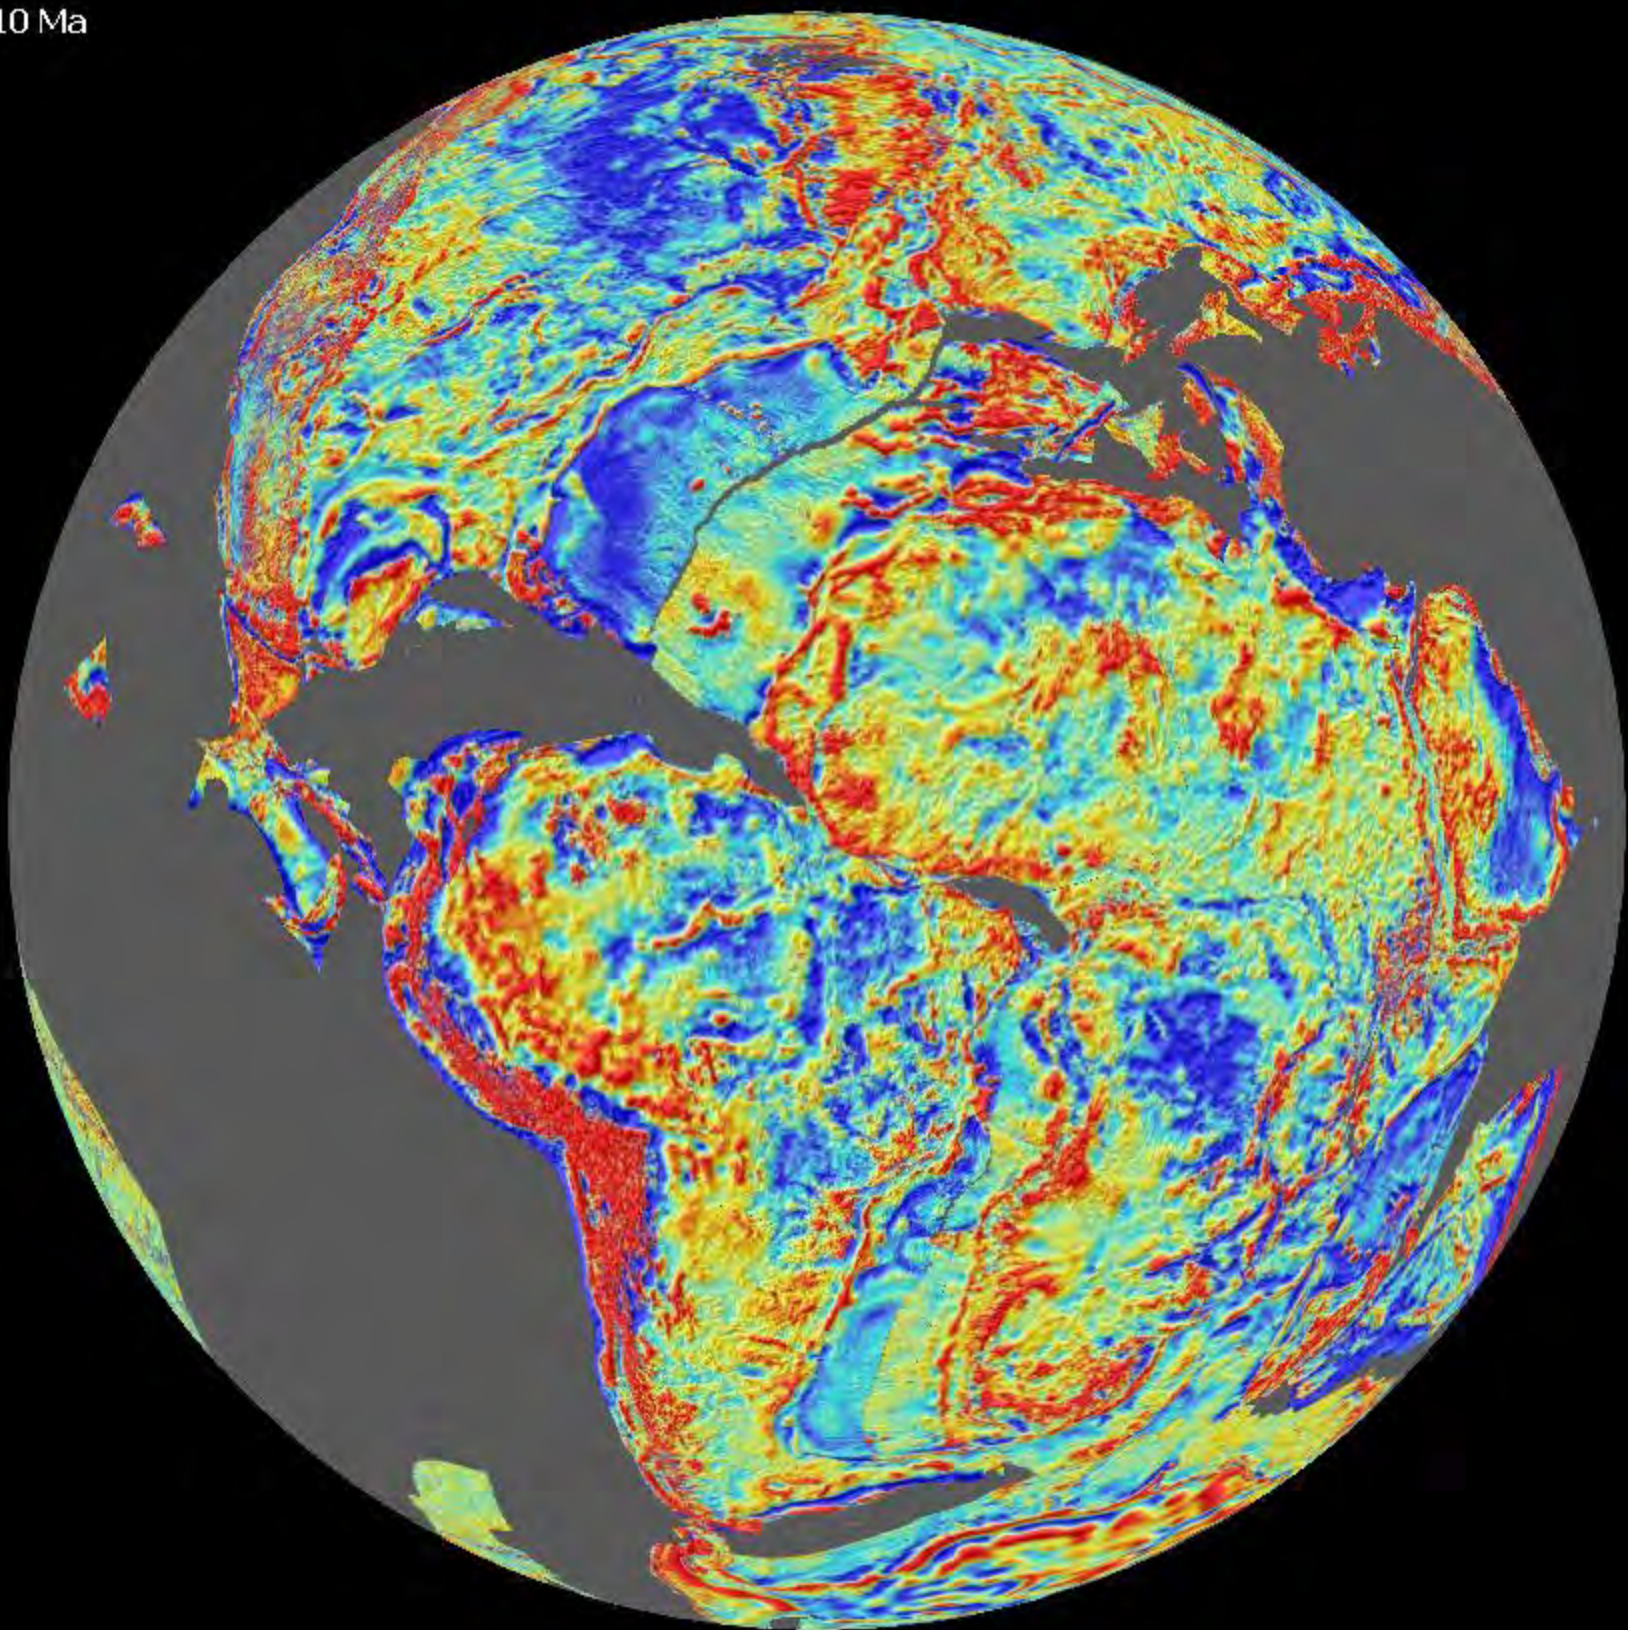



115 Ma

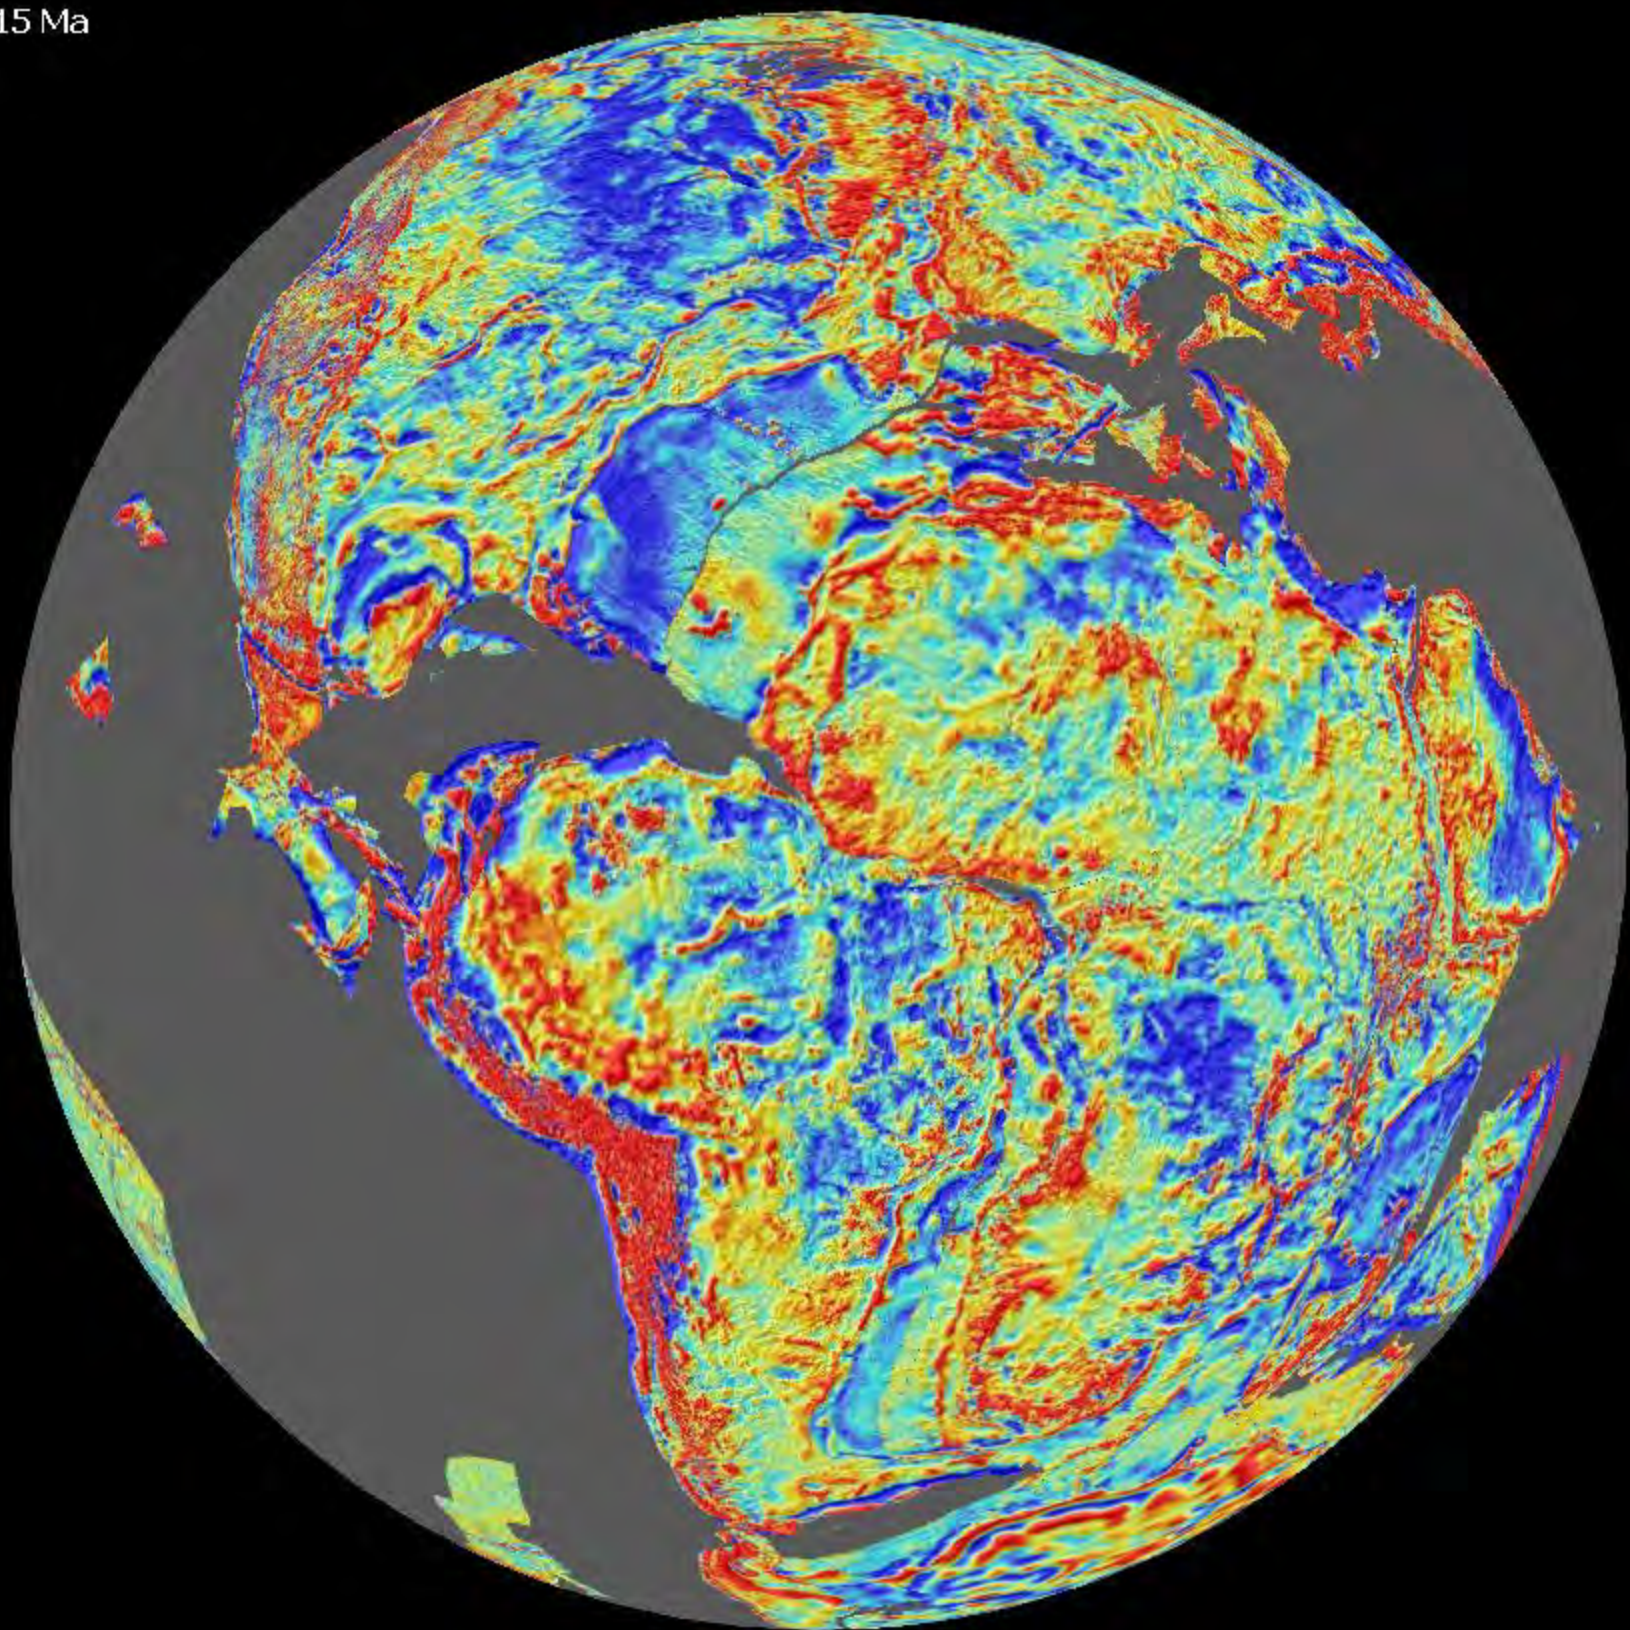



120 Ma

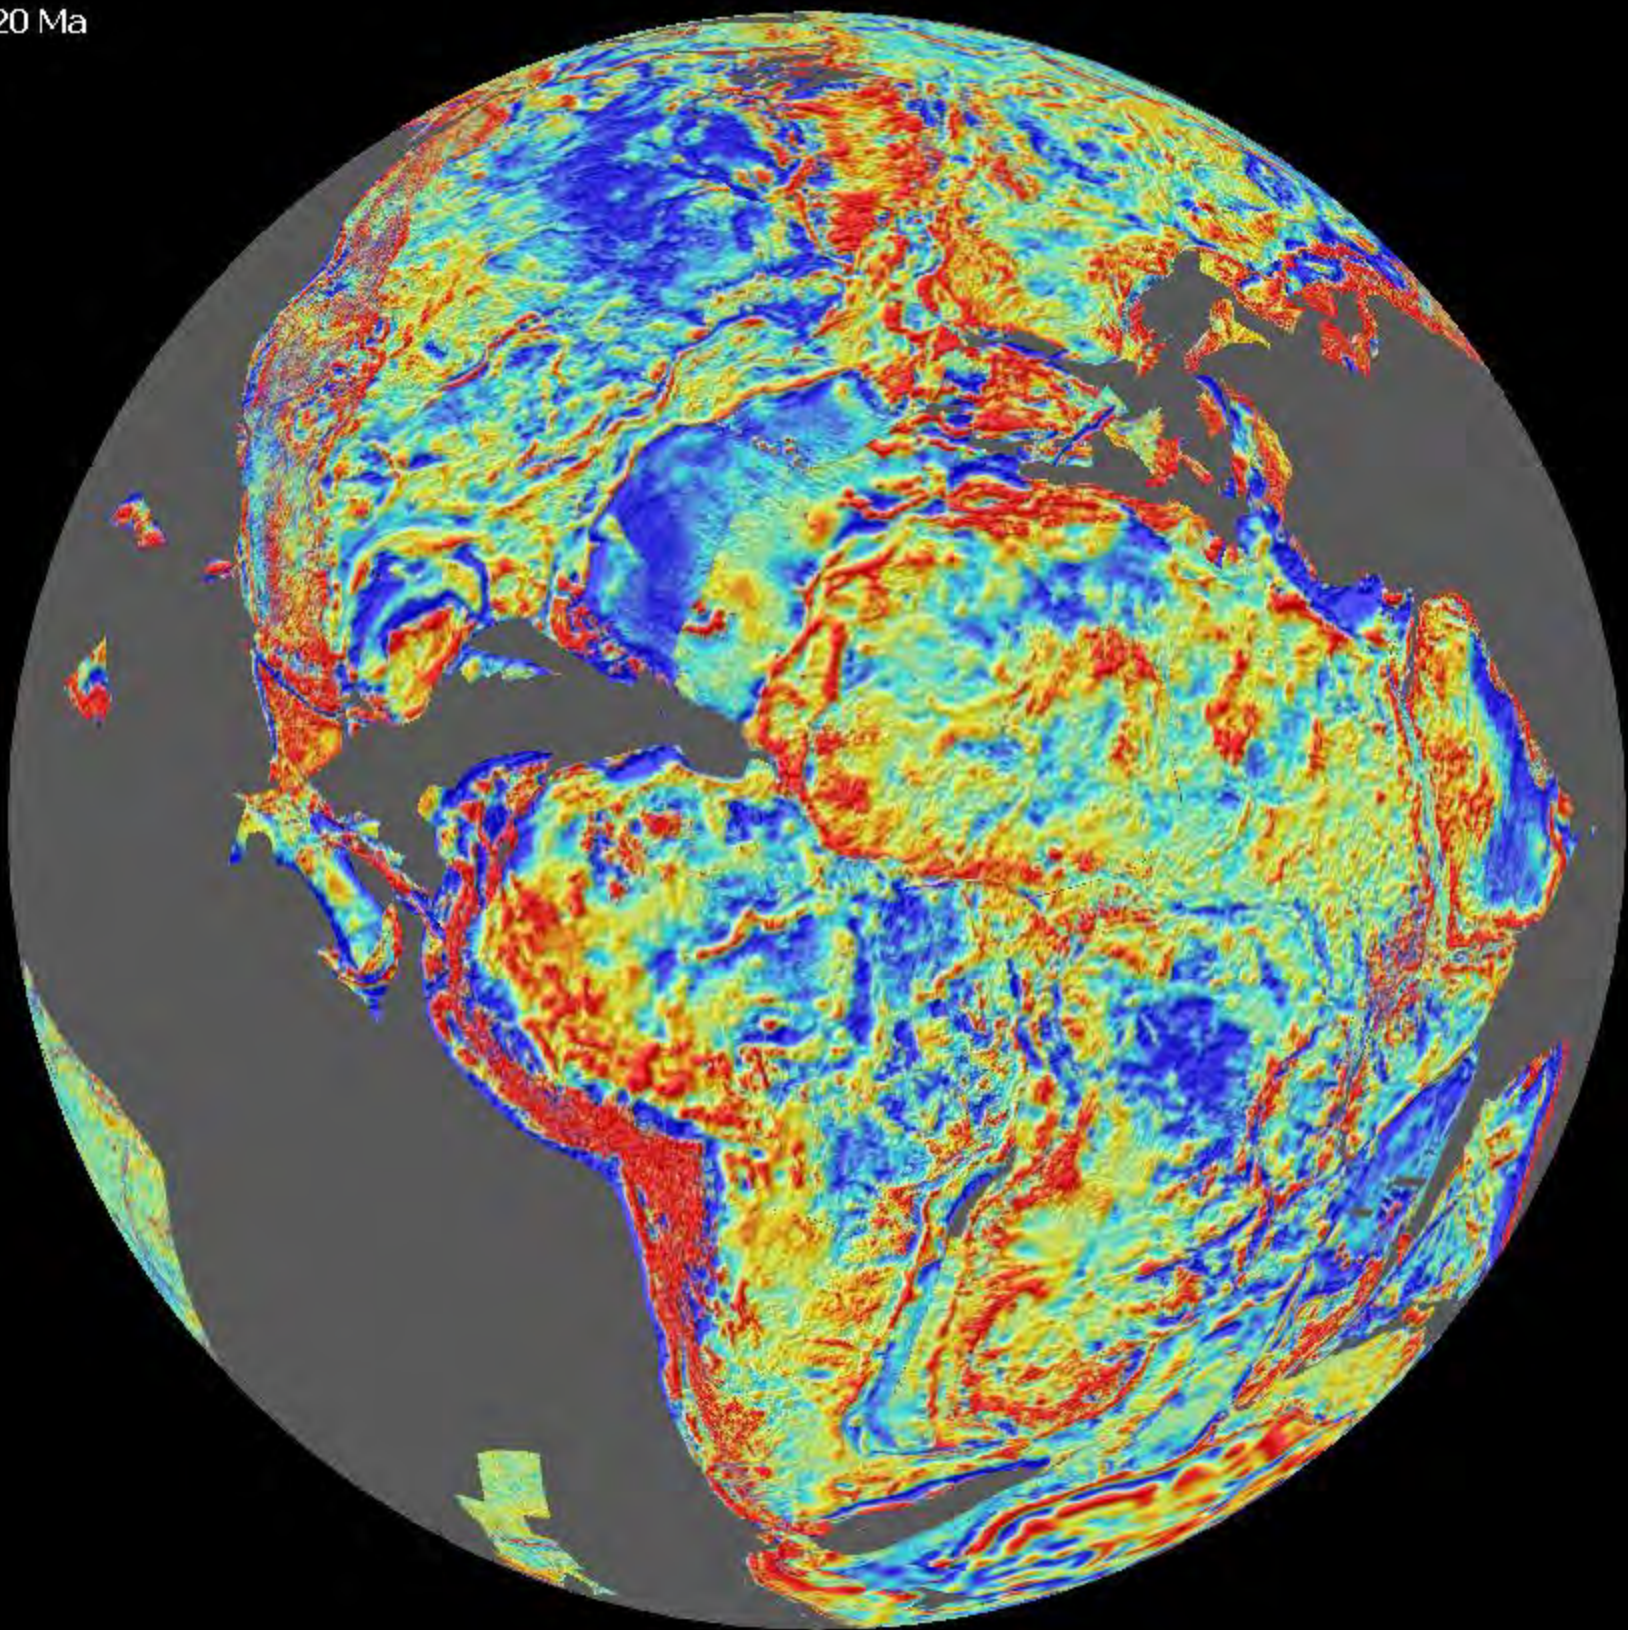



125 Ma

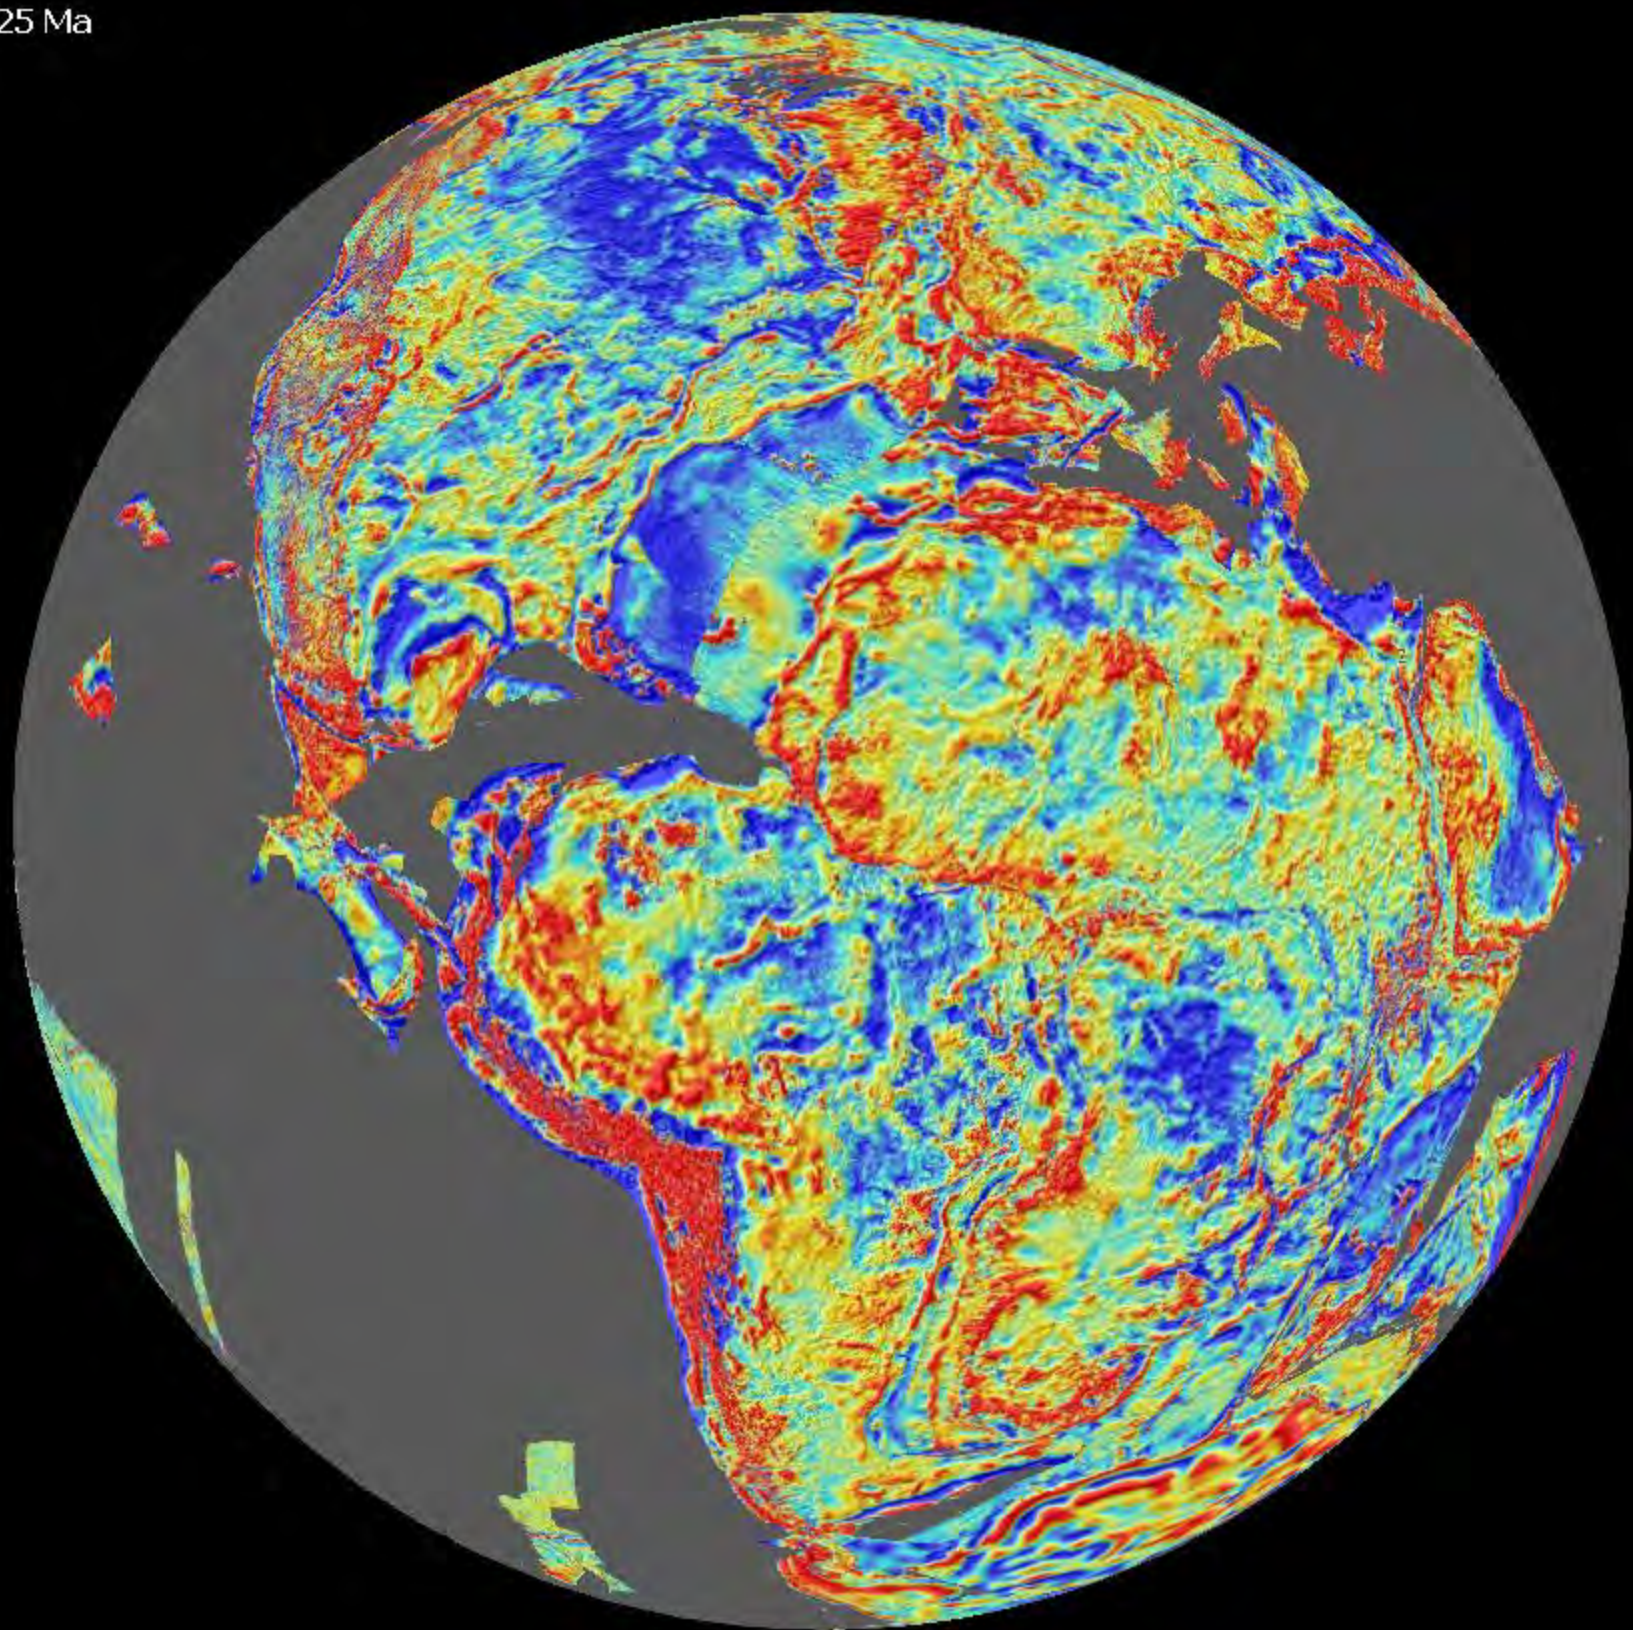



130 Ma

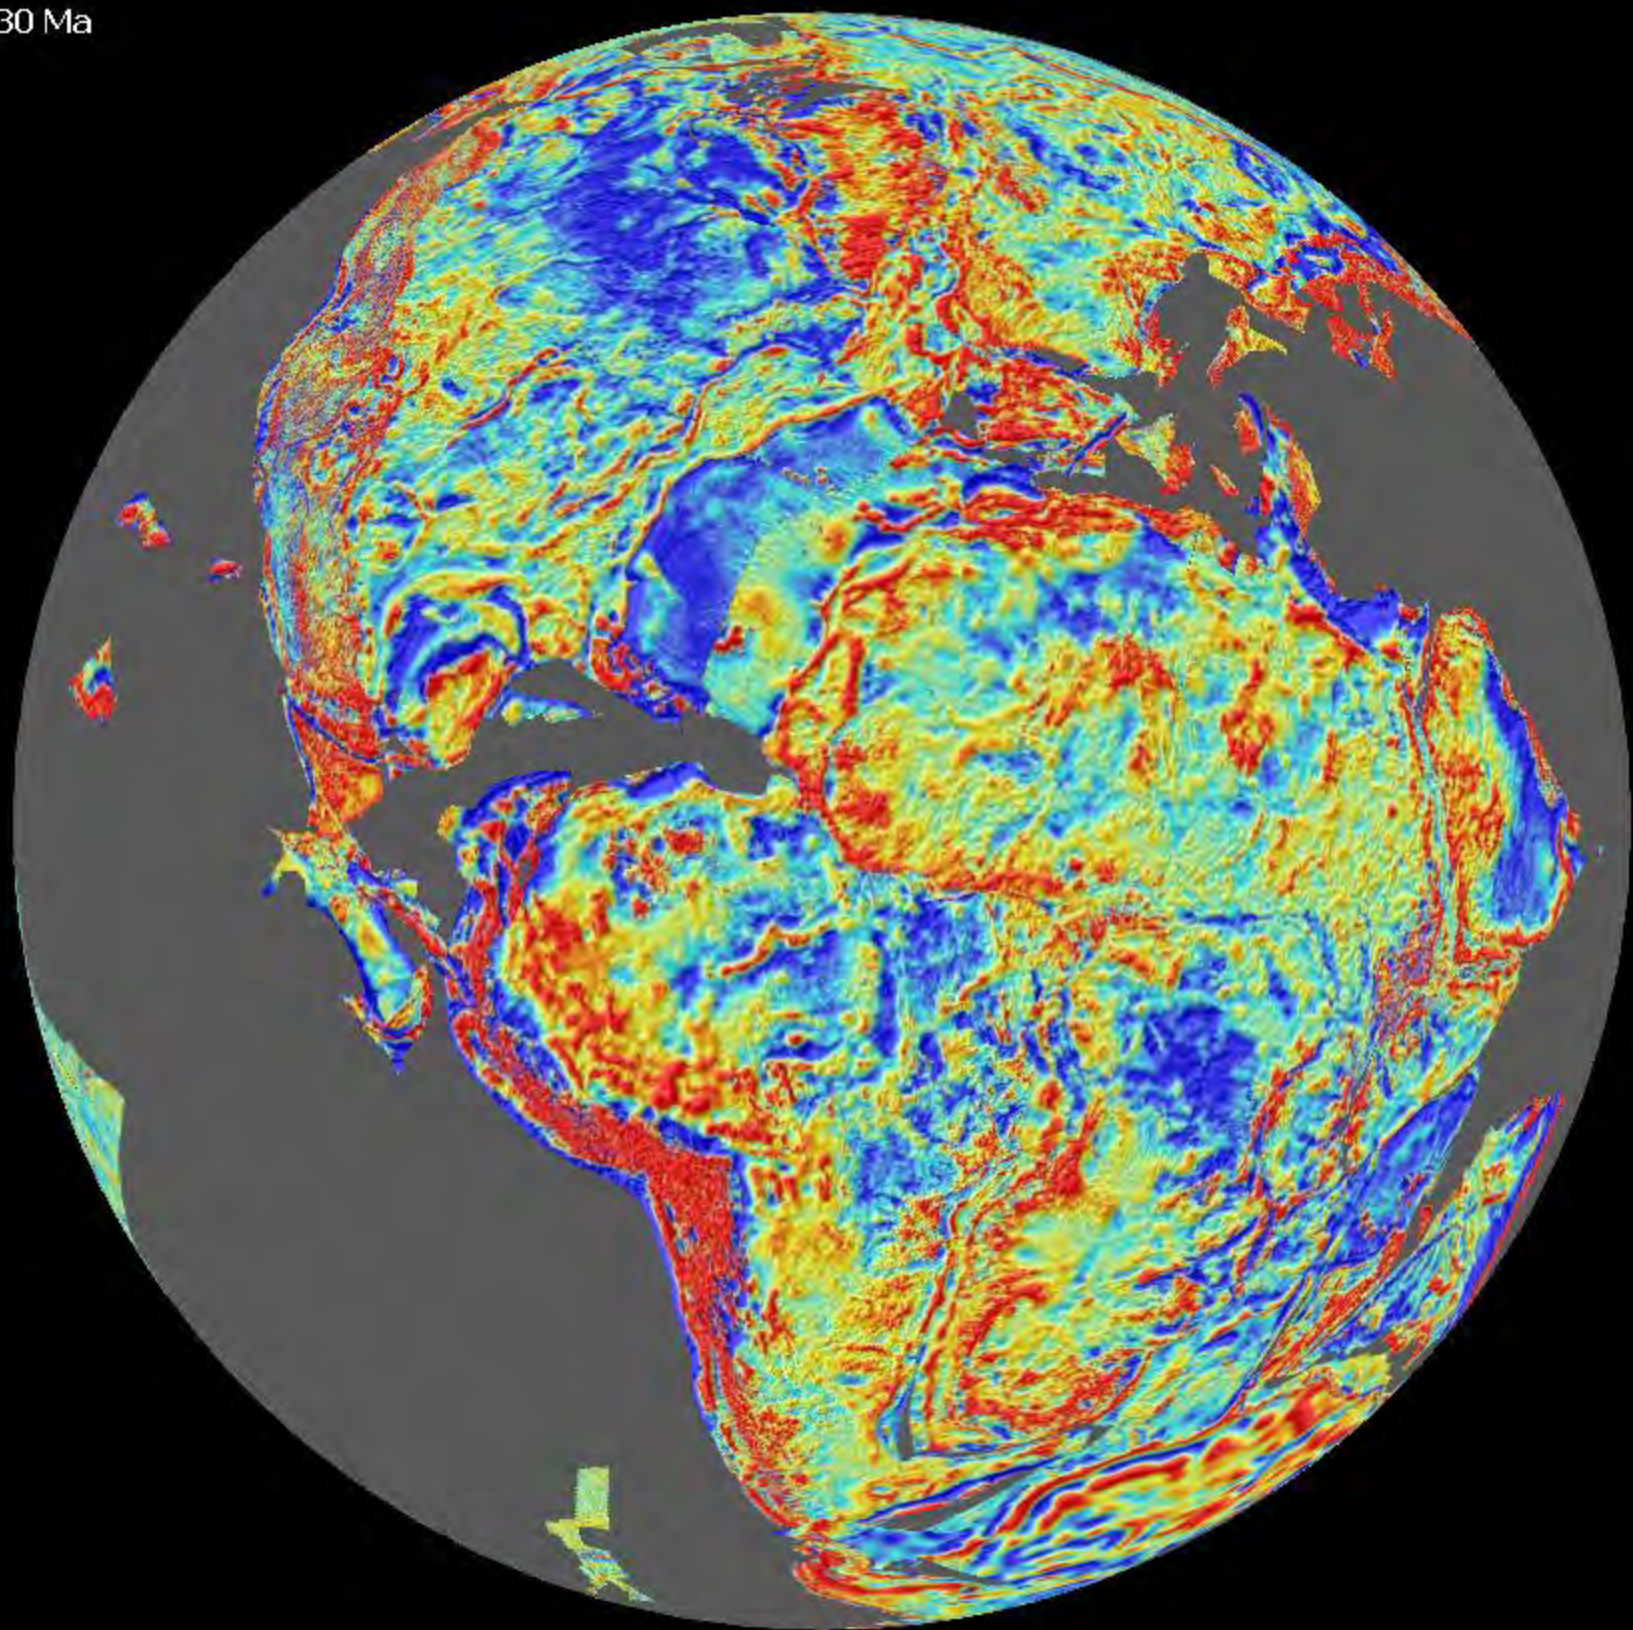



135 Ma

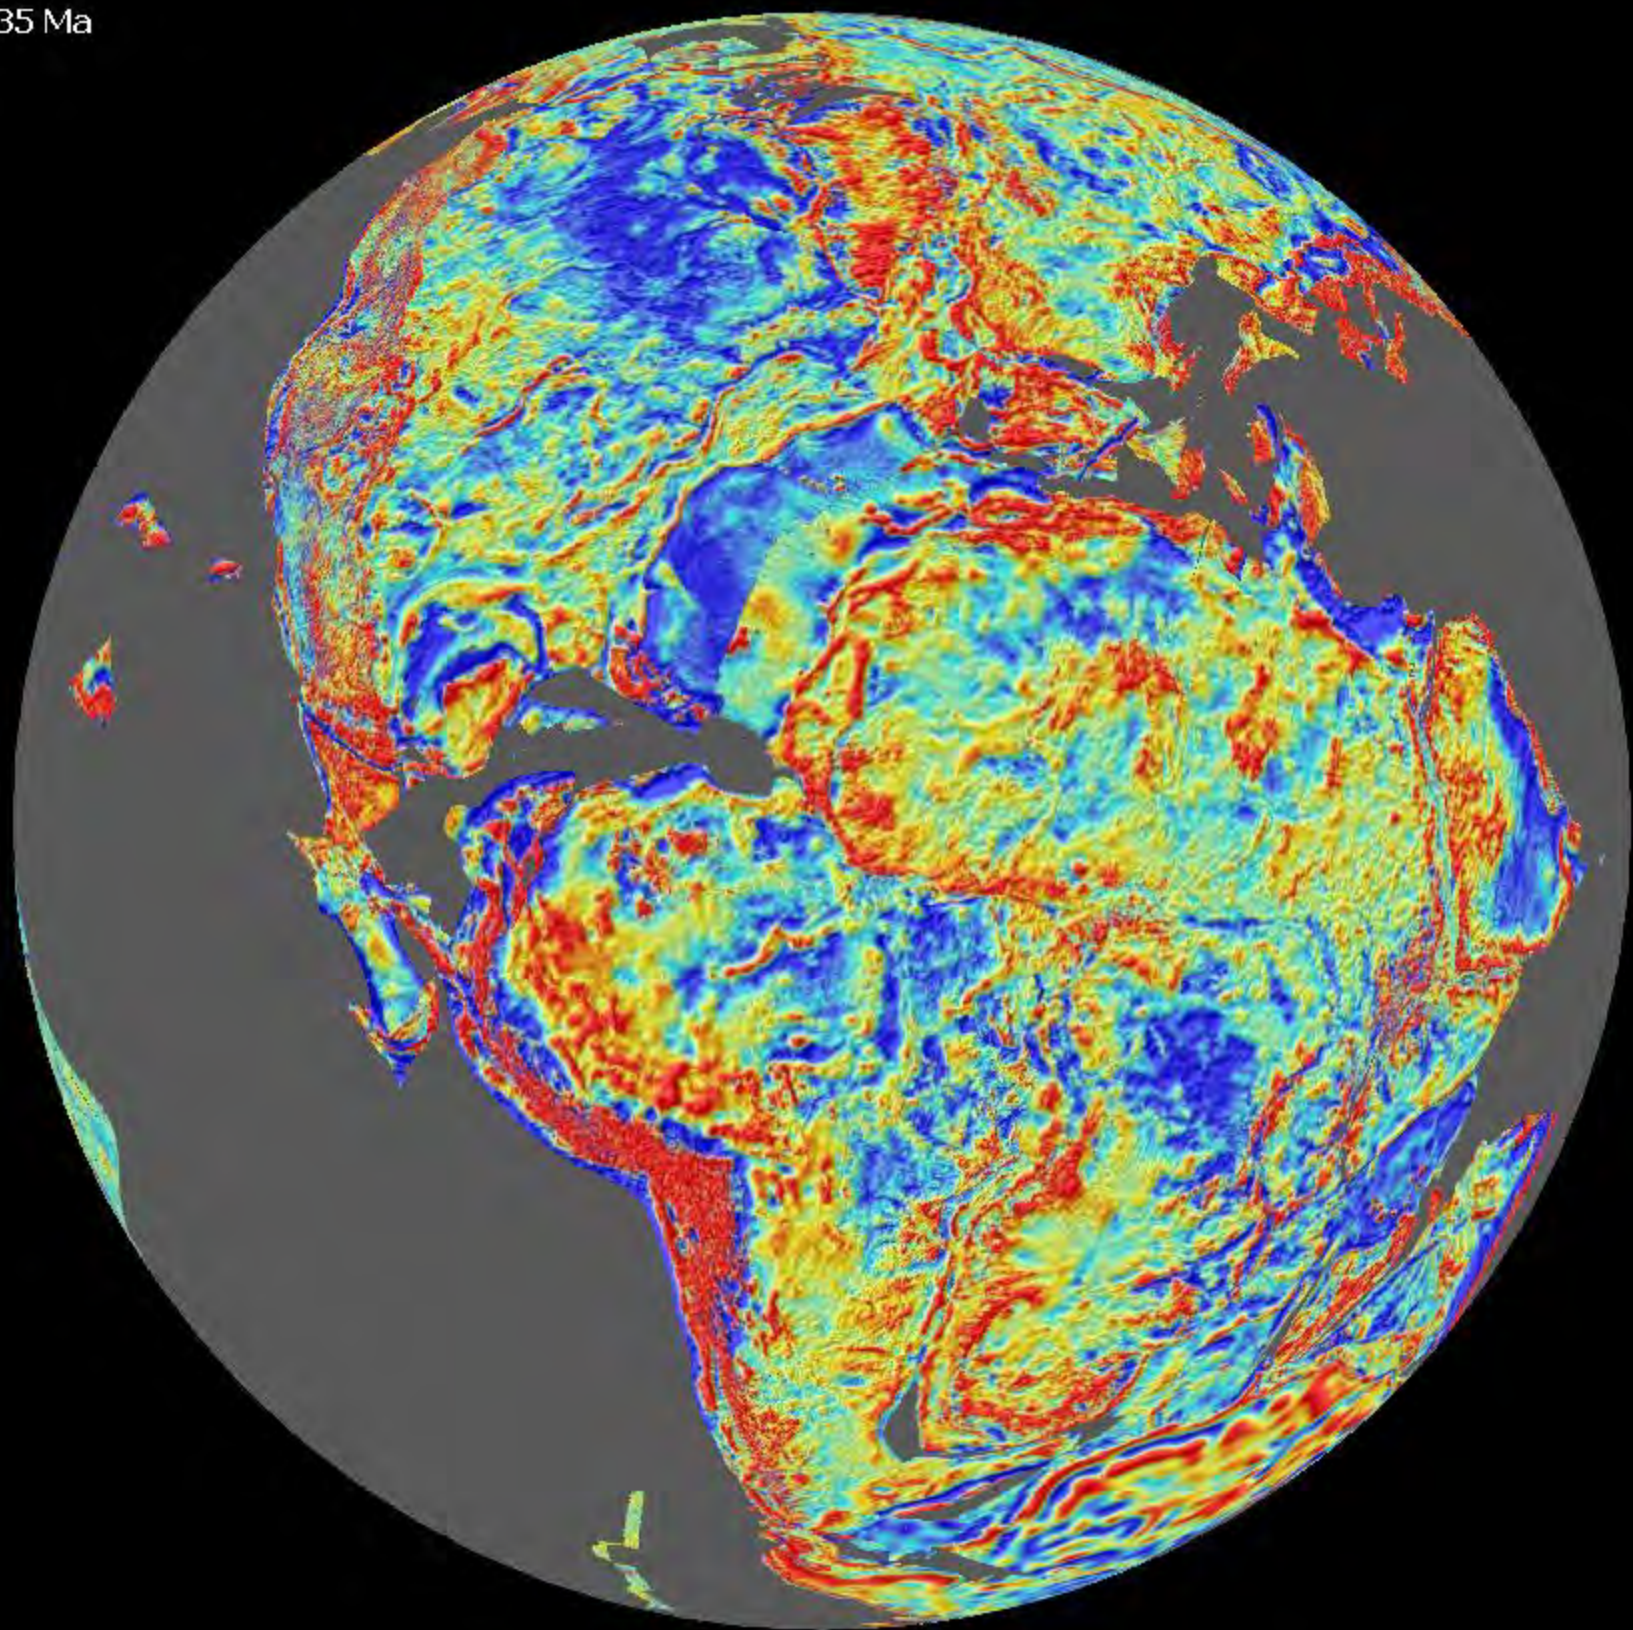



140 Ma

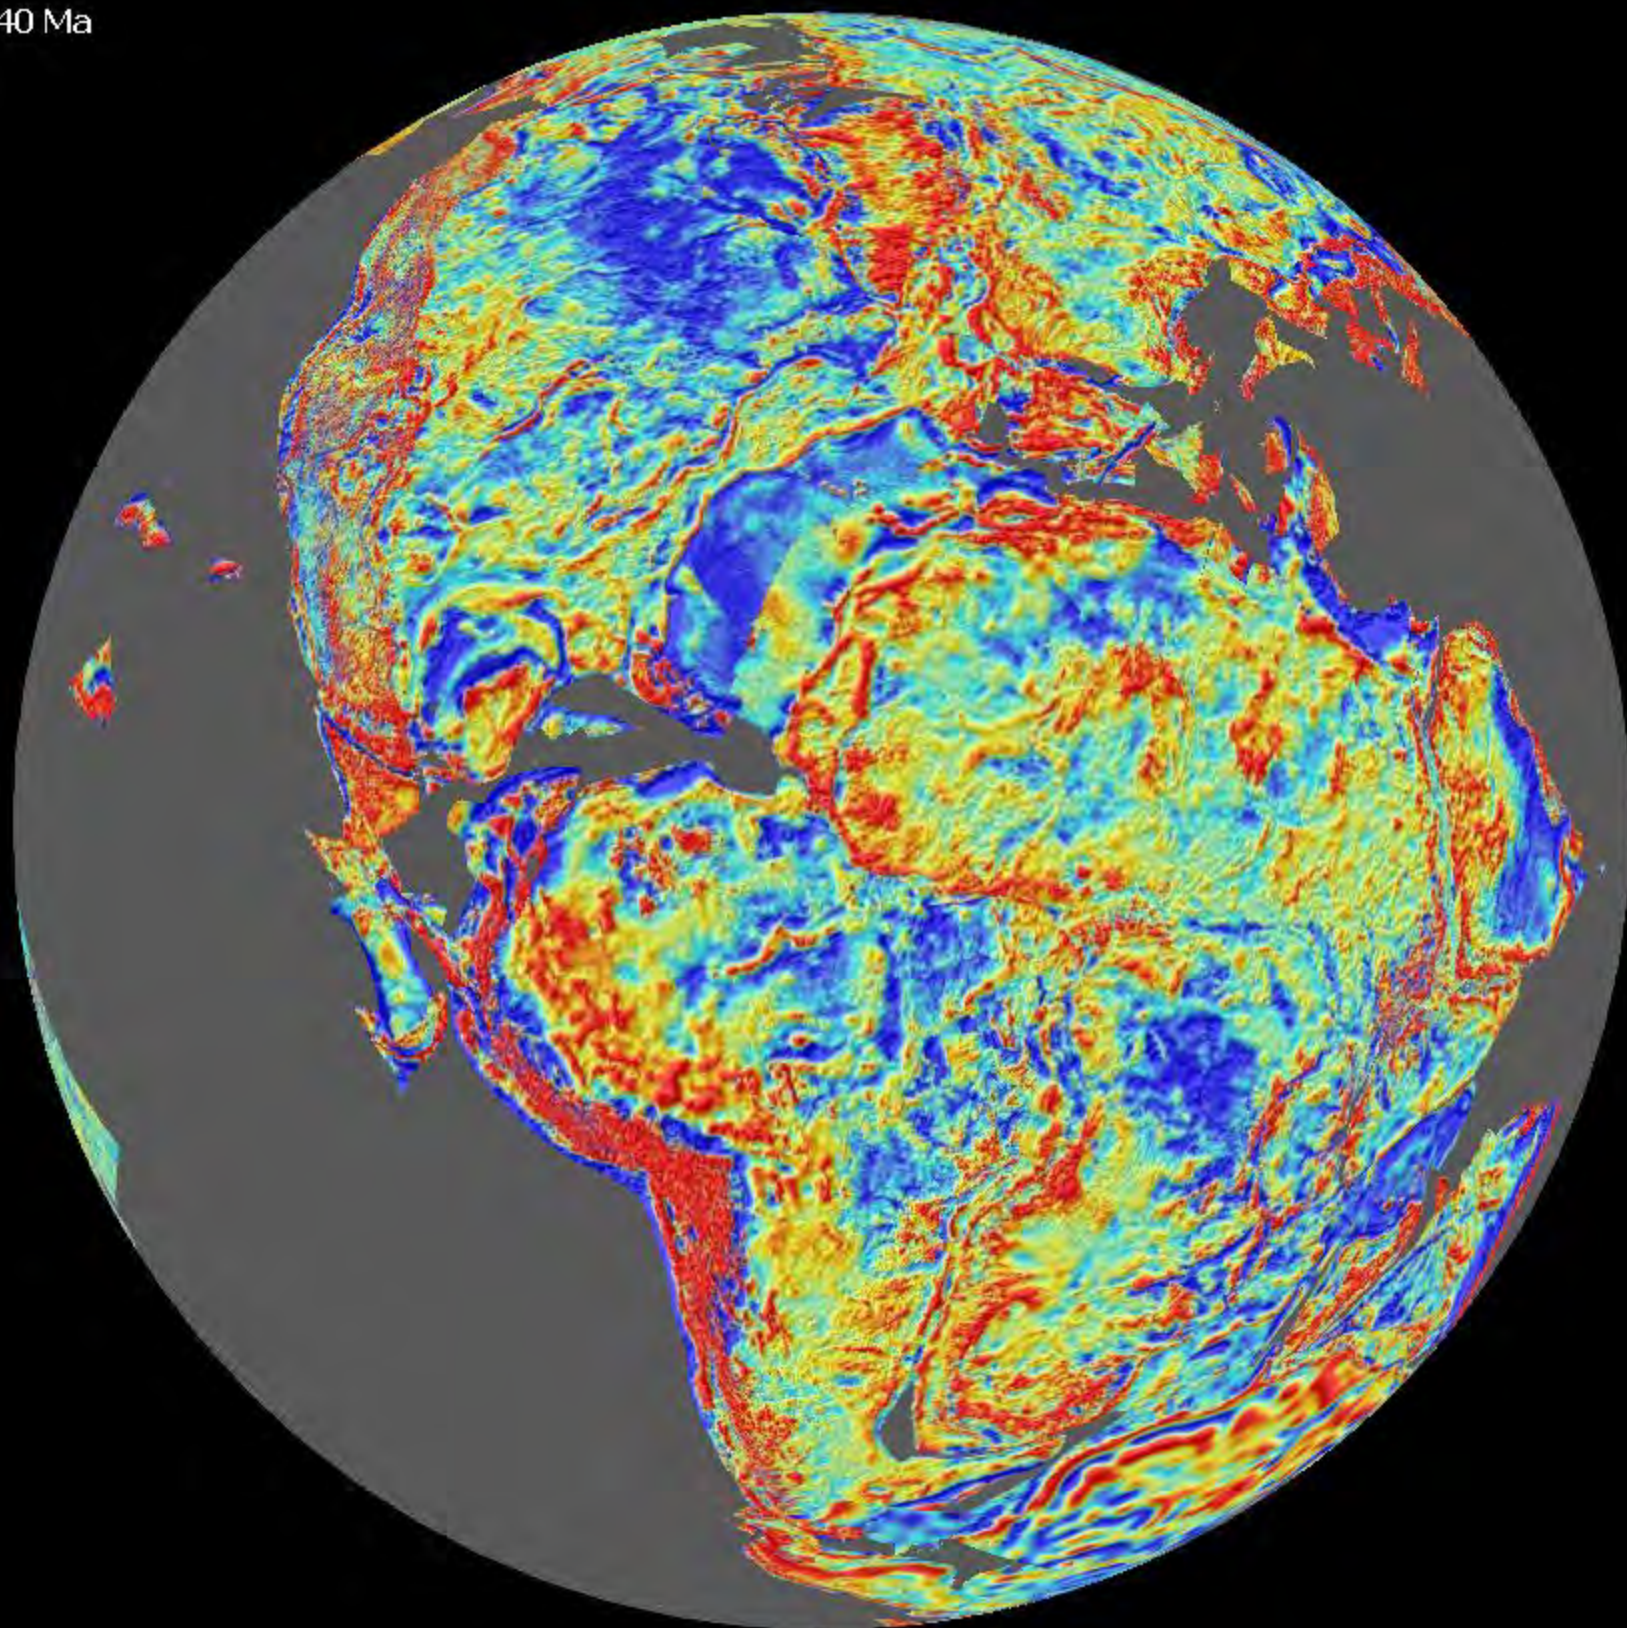

Supplement: Supplementary file 1 [file 1]

0 Ma

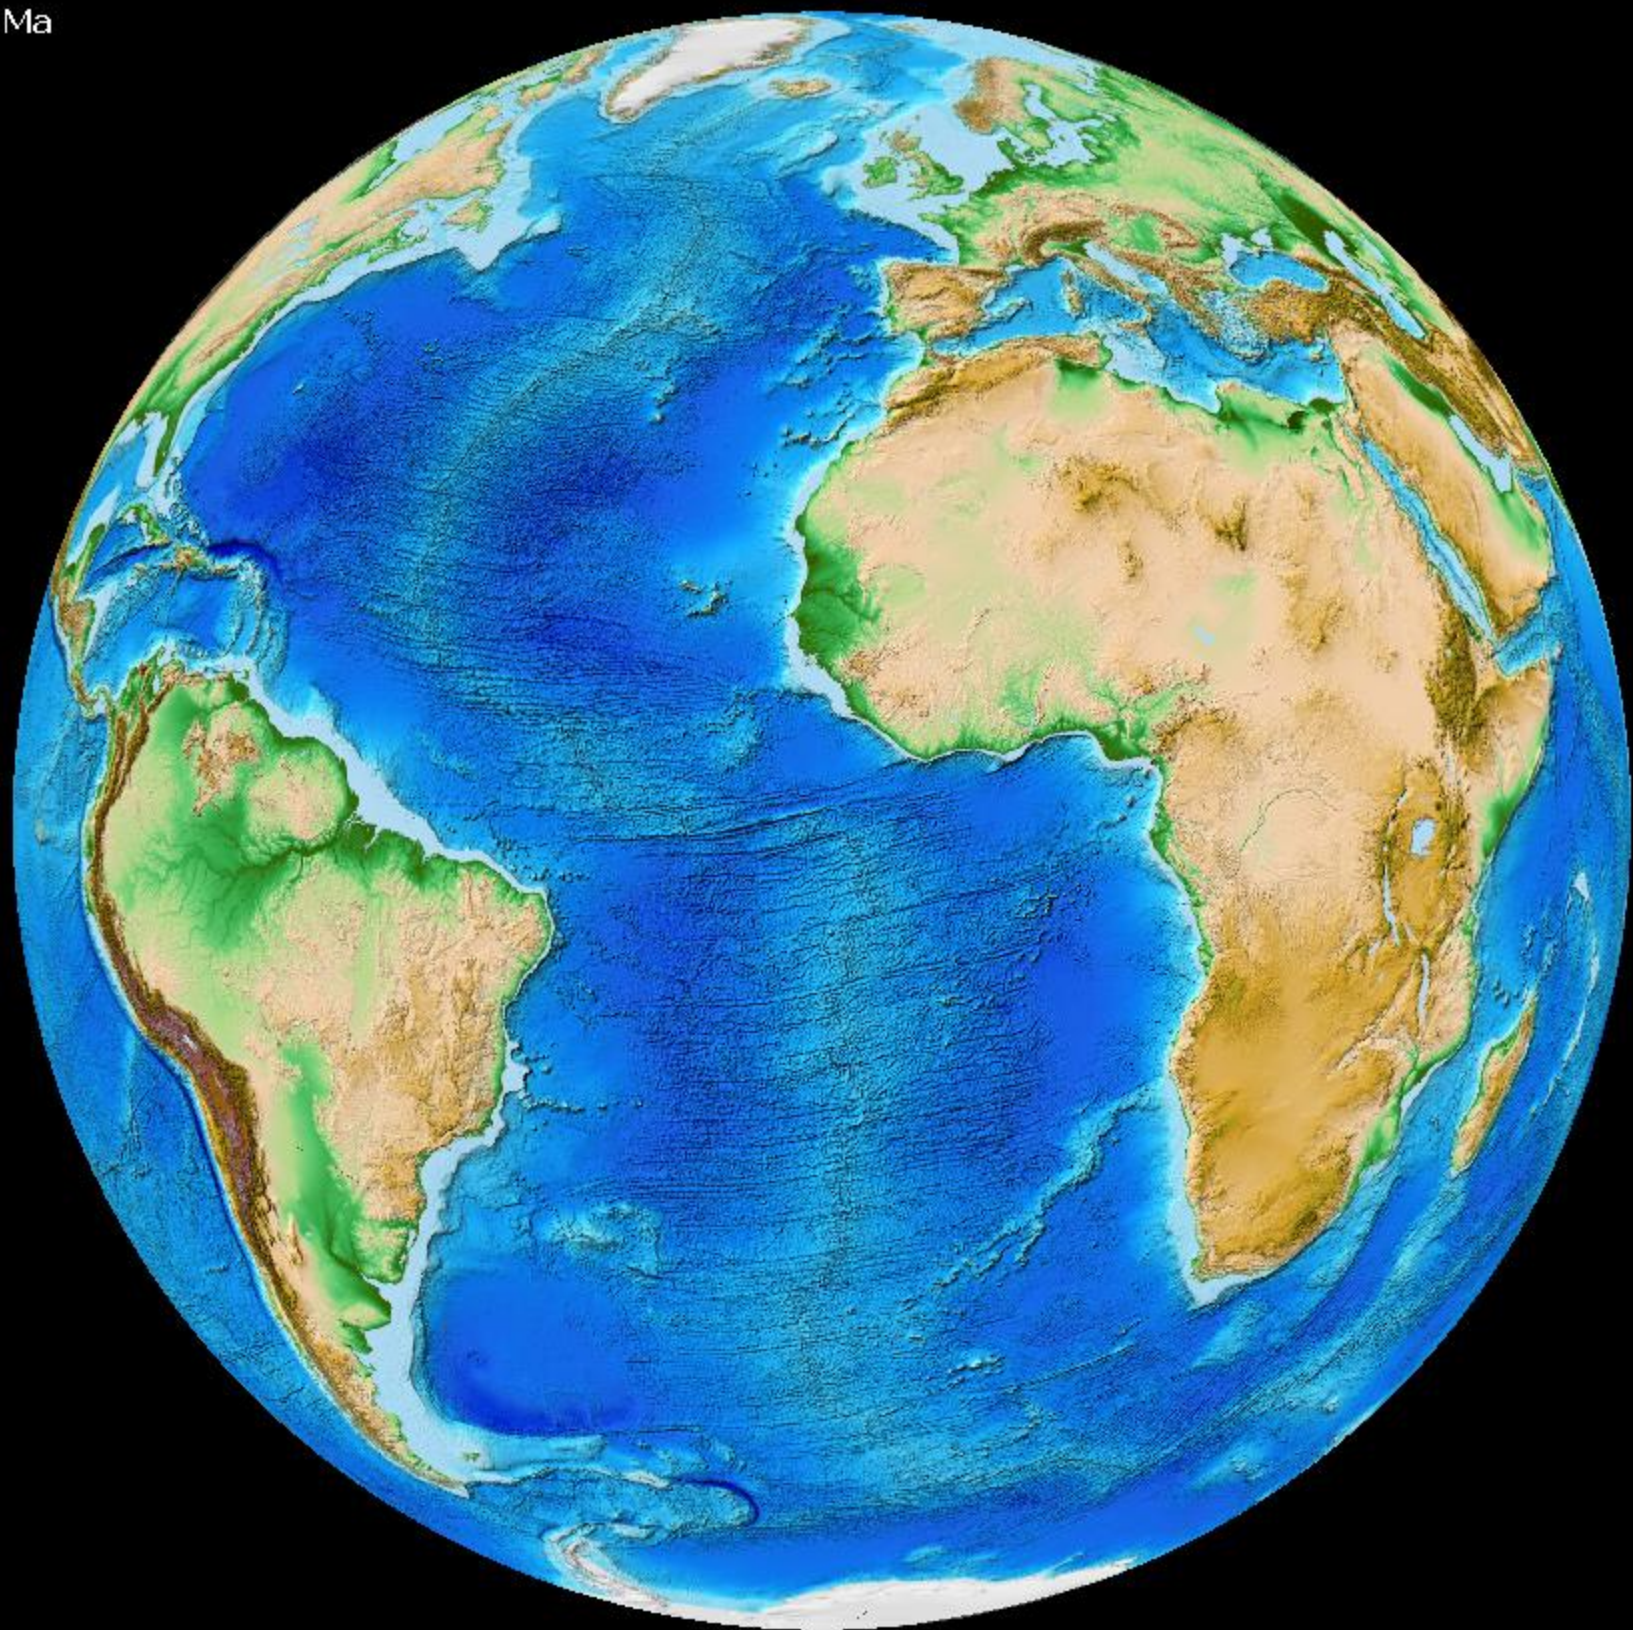



5 Ma

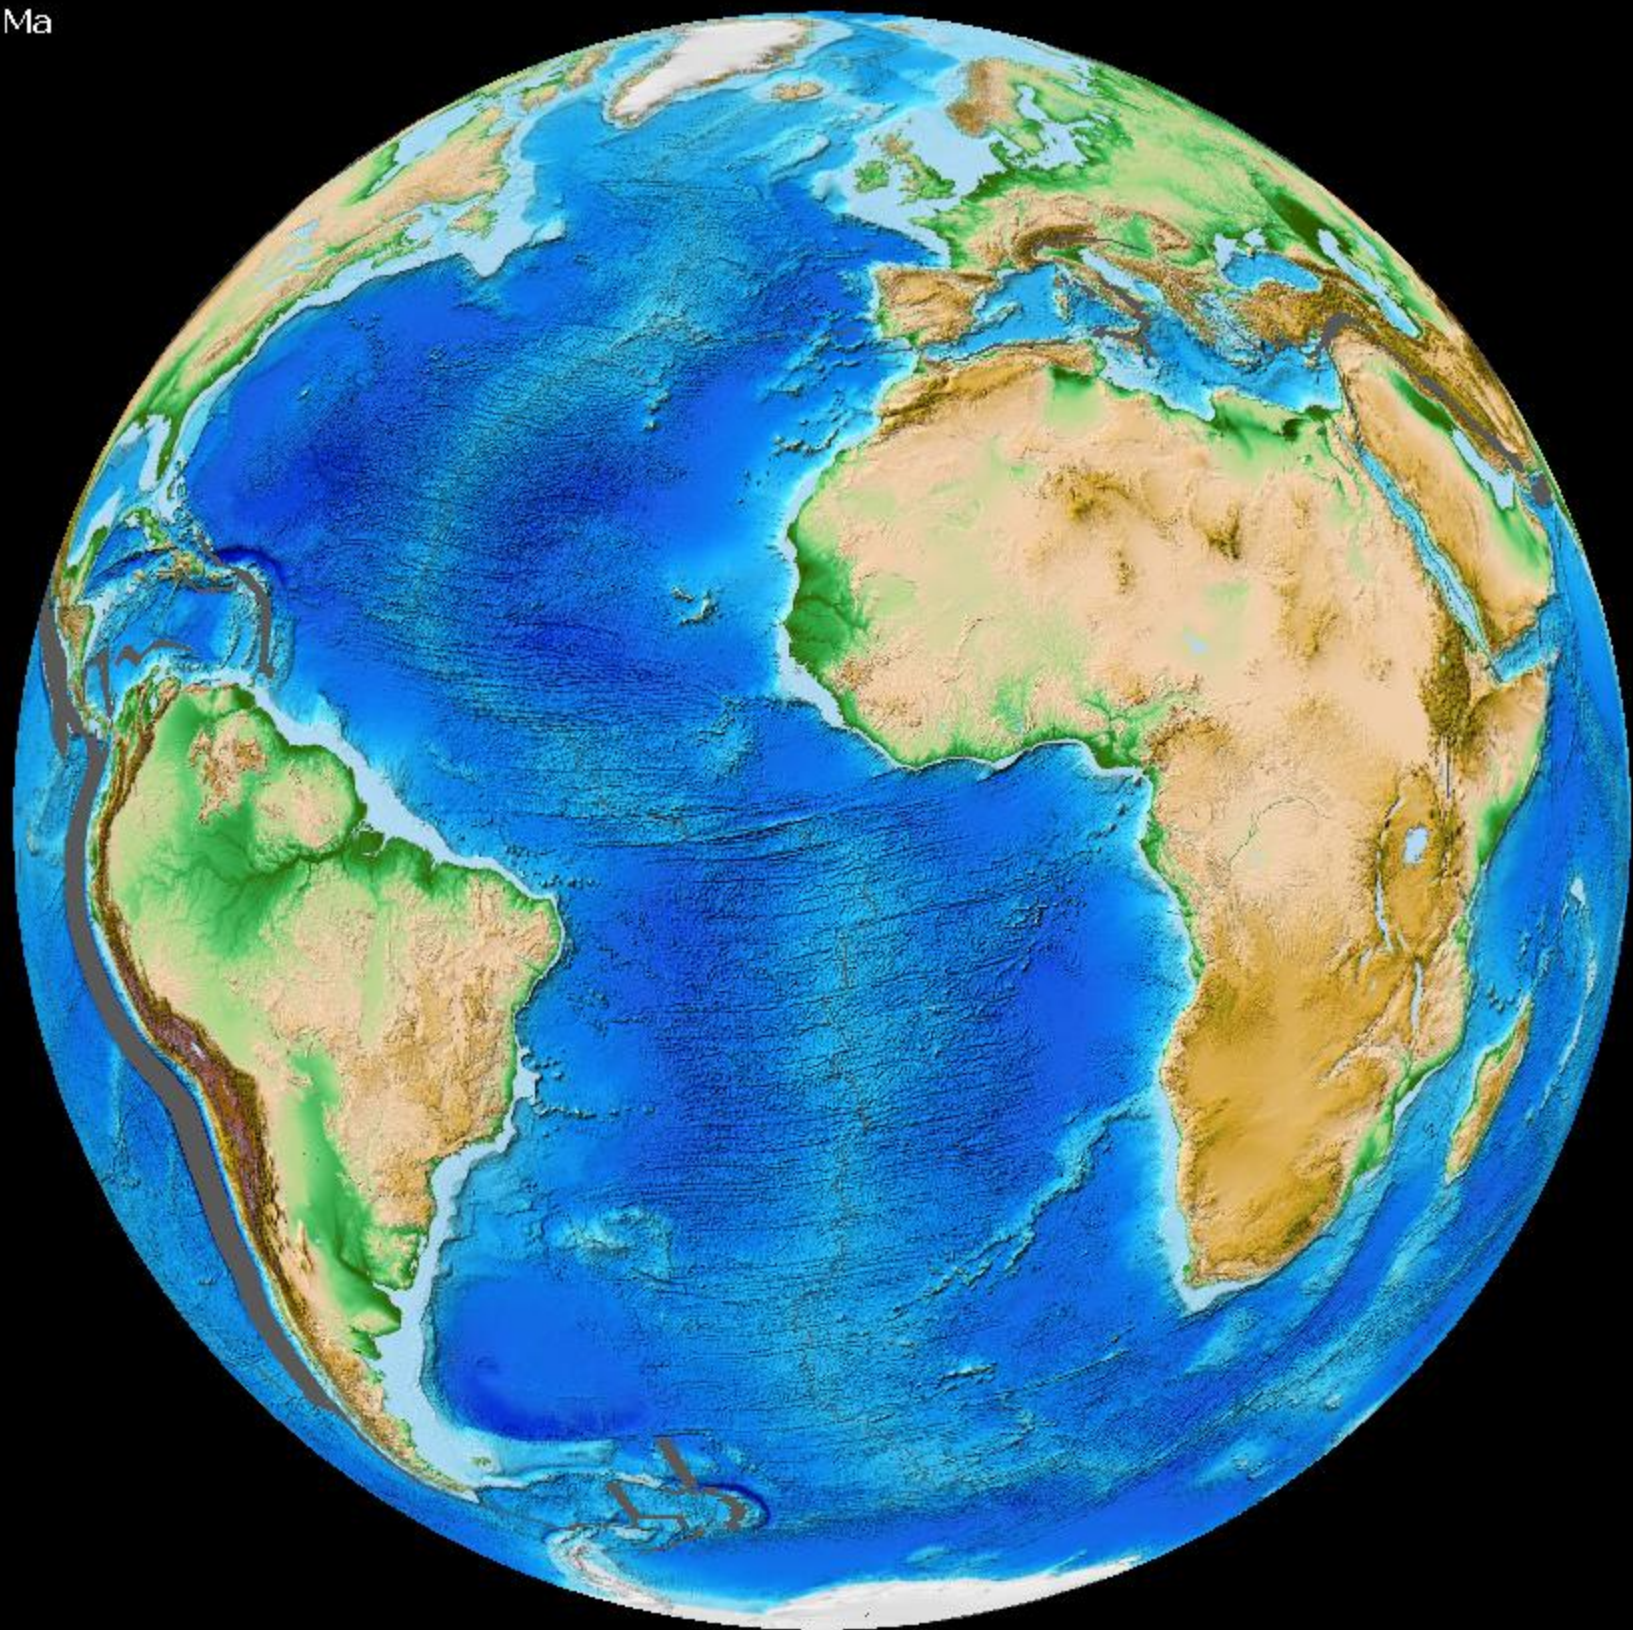



10 Ma

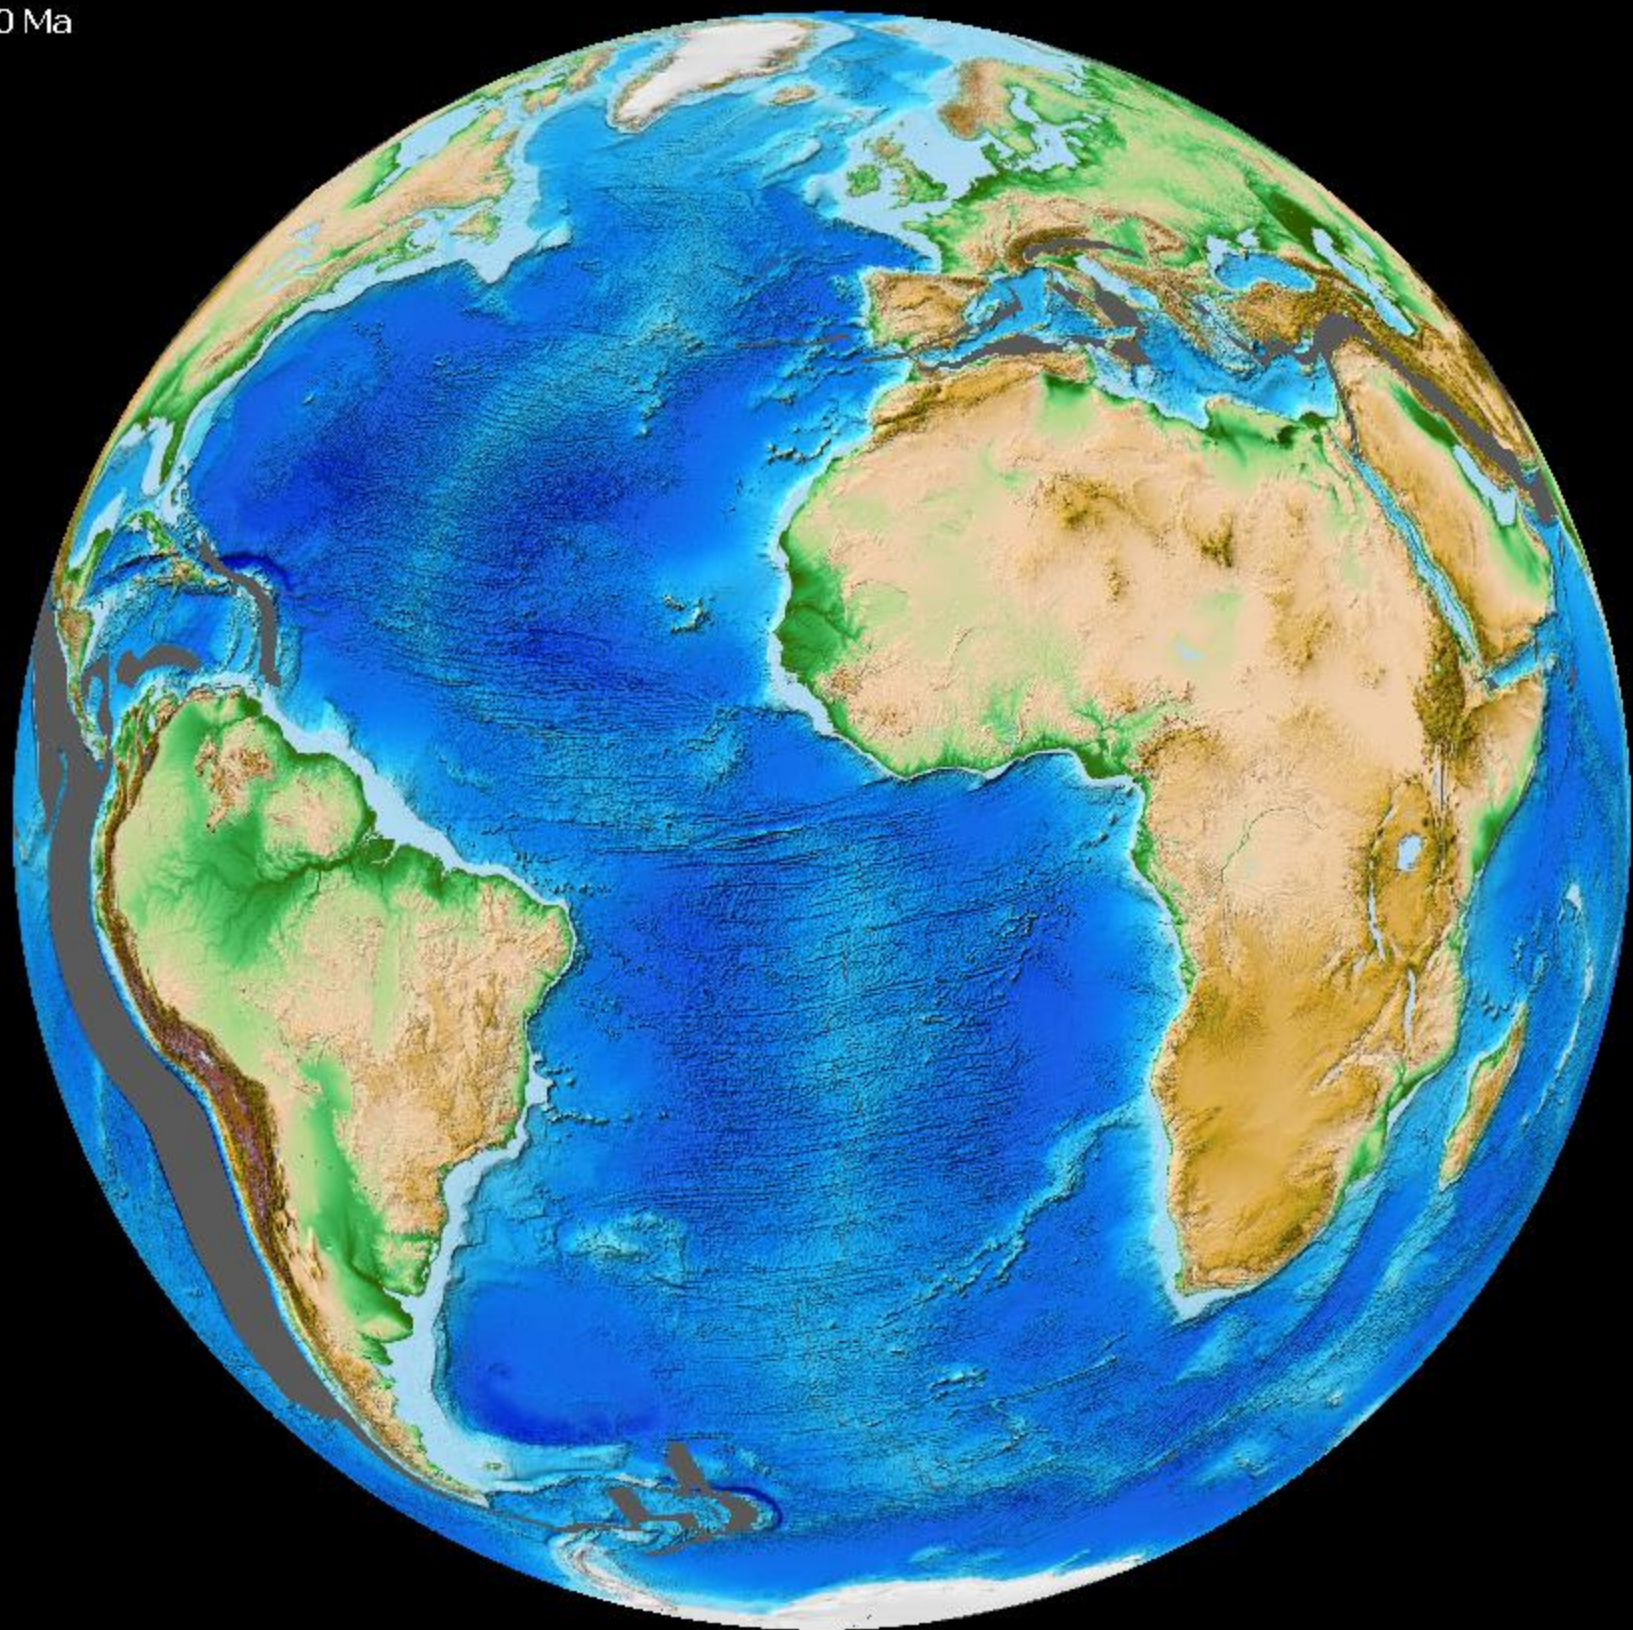



15 Ma

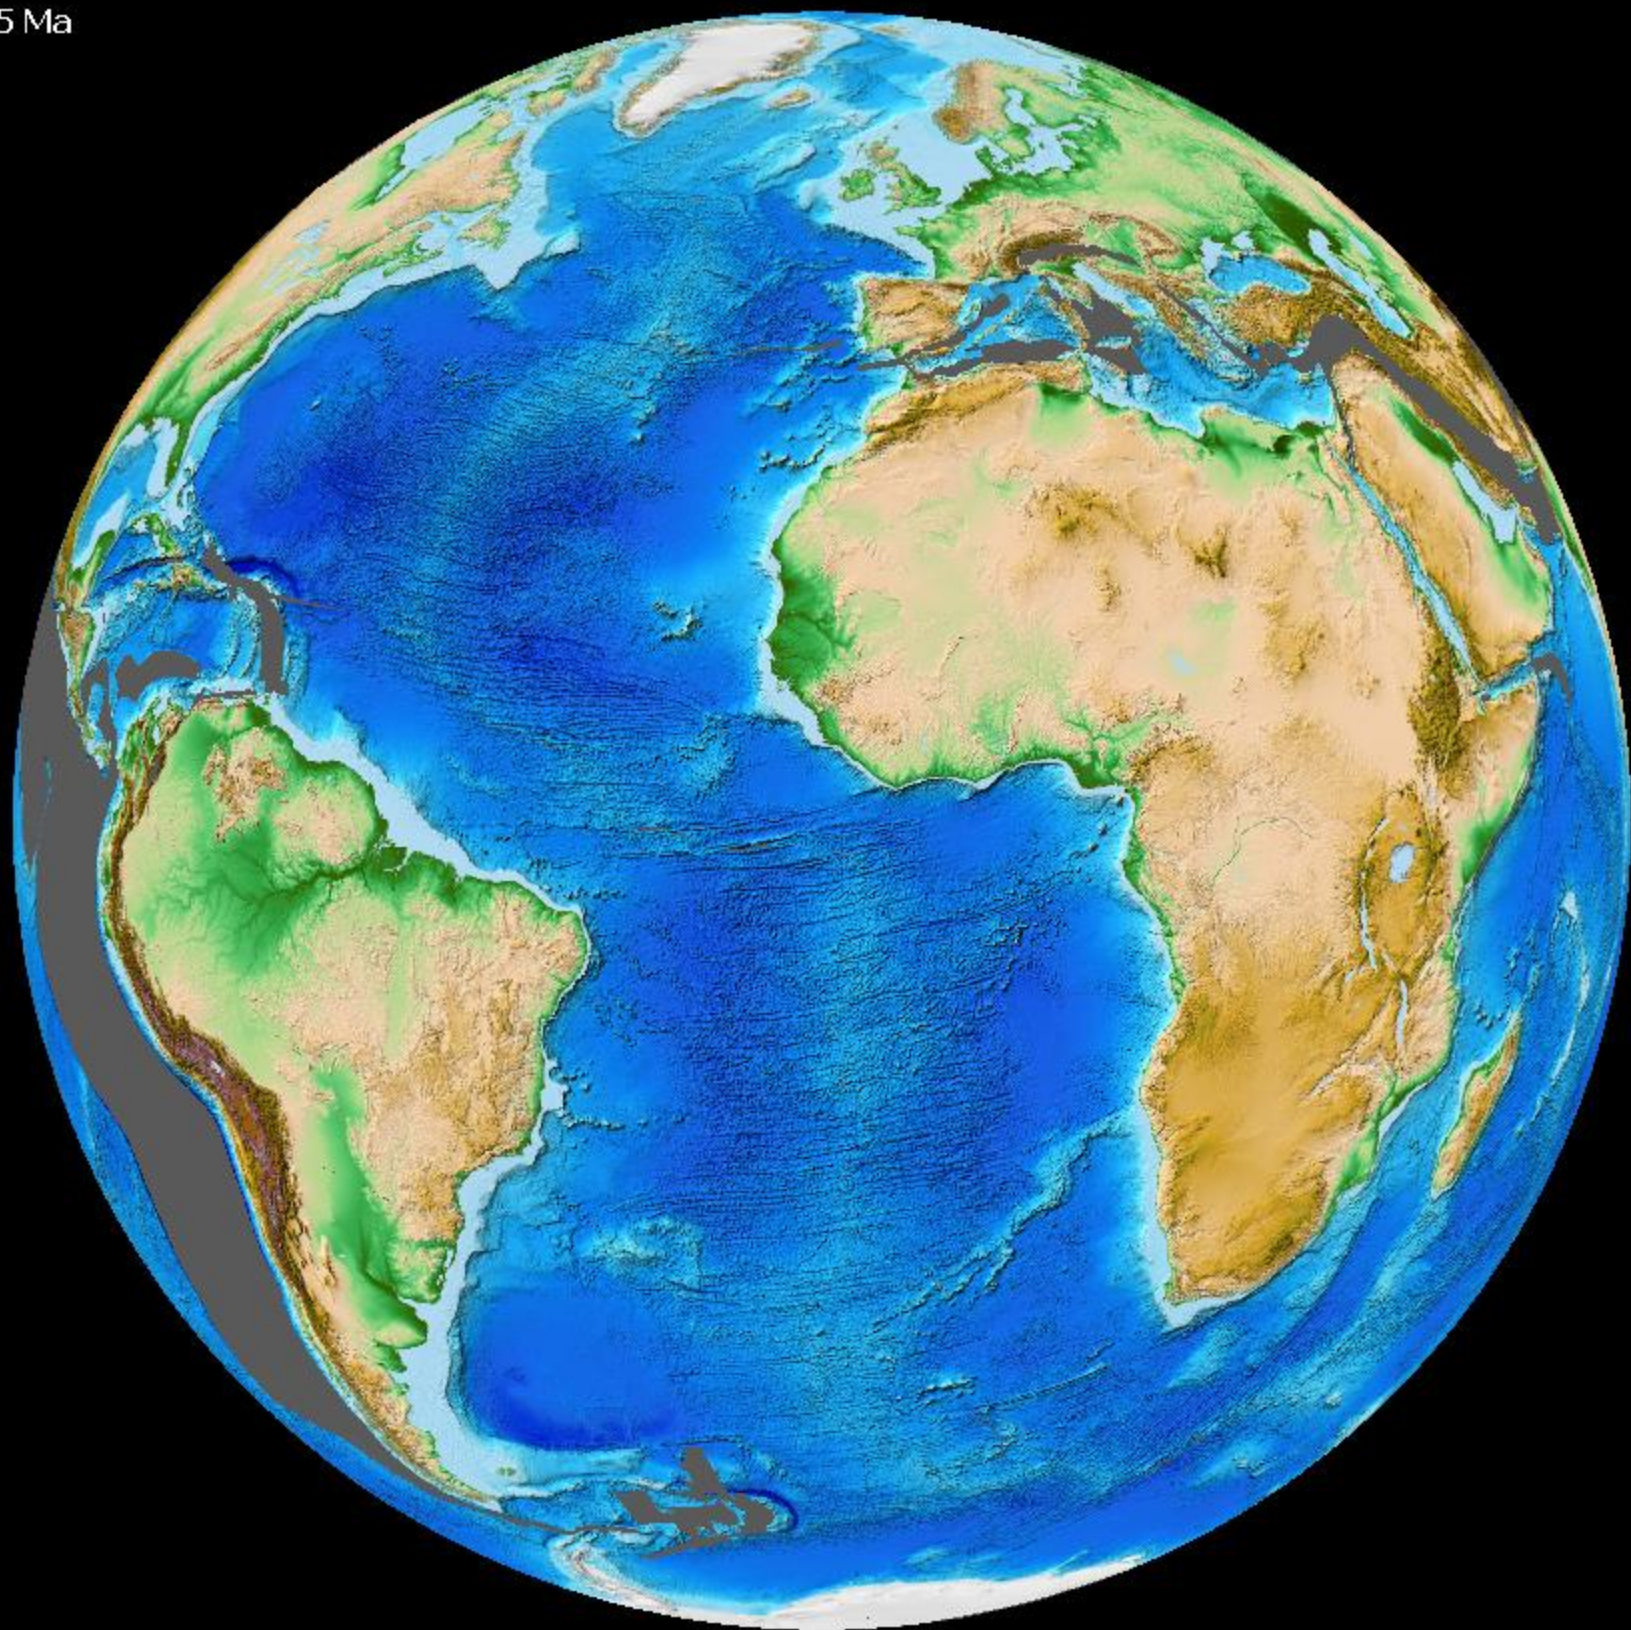



20 Ma

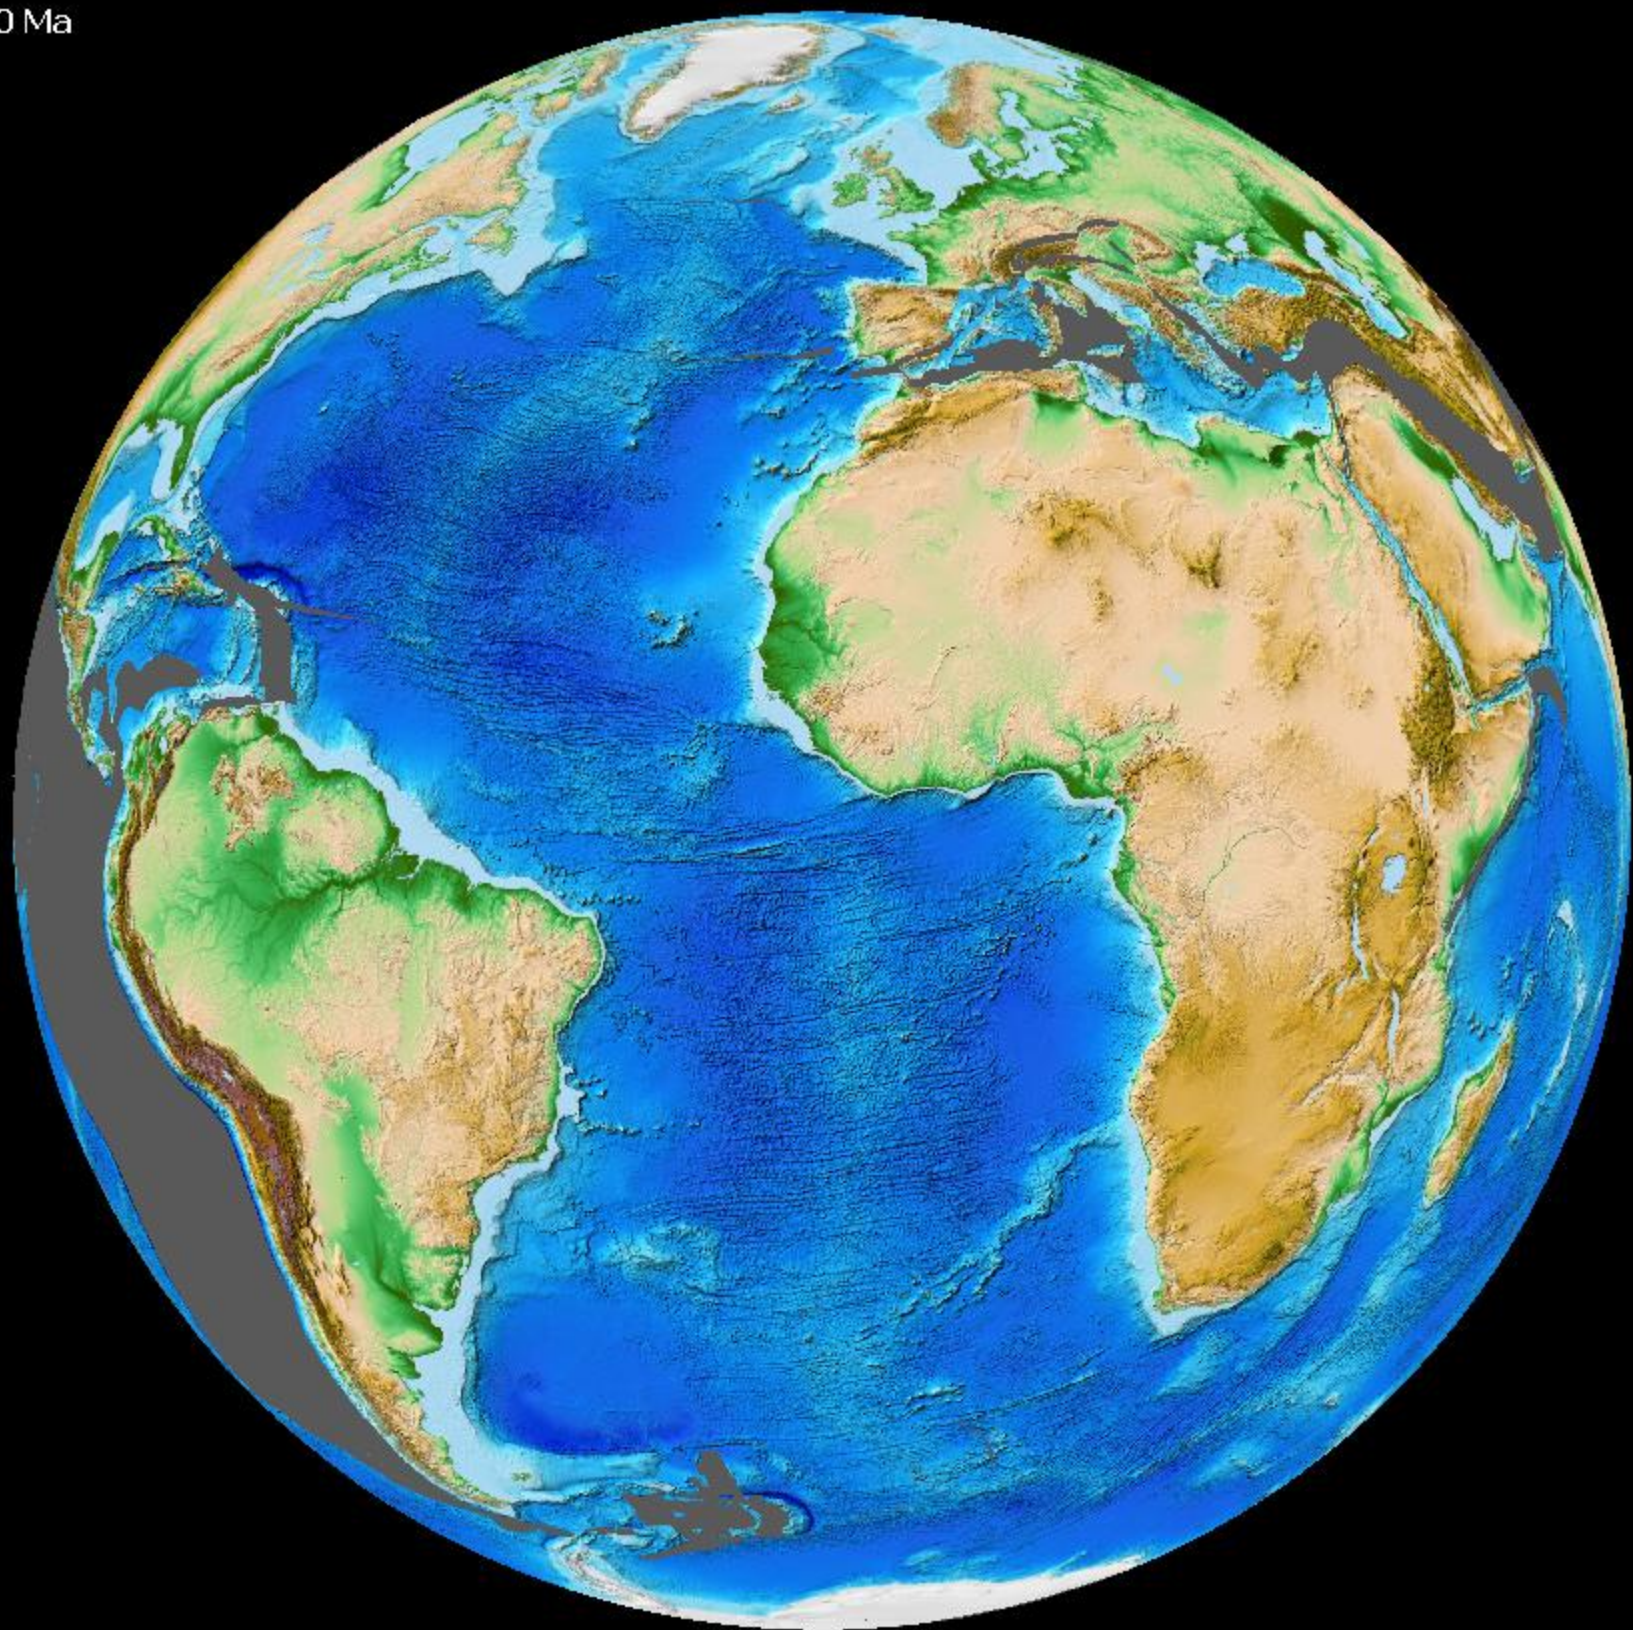



25 Ma

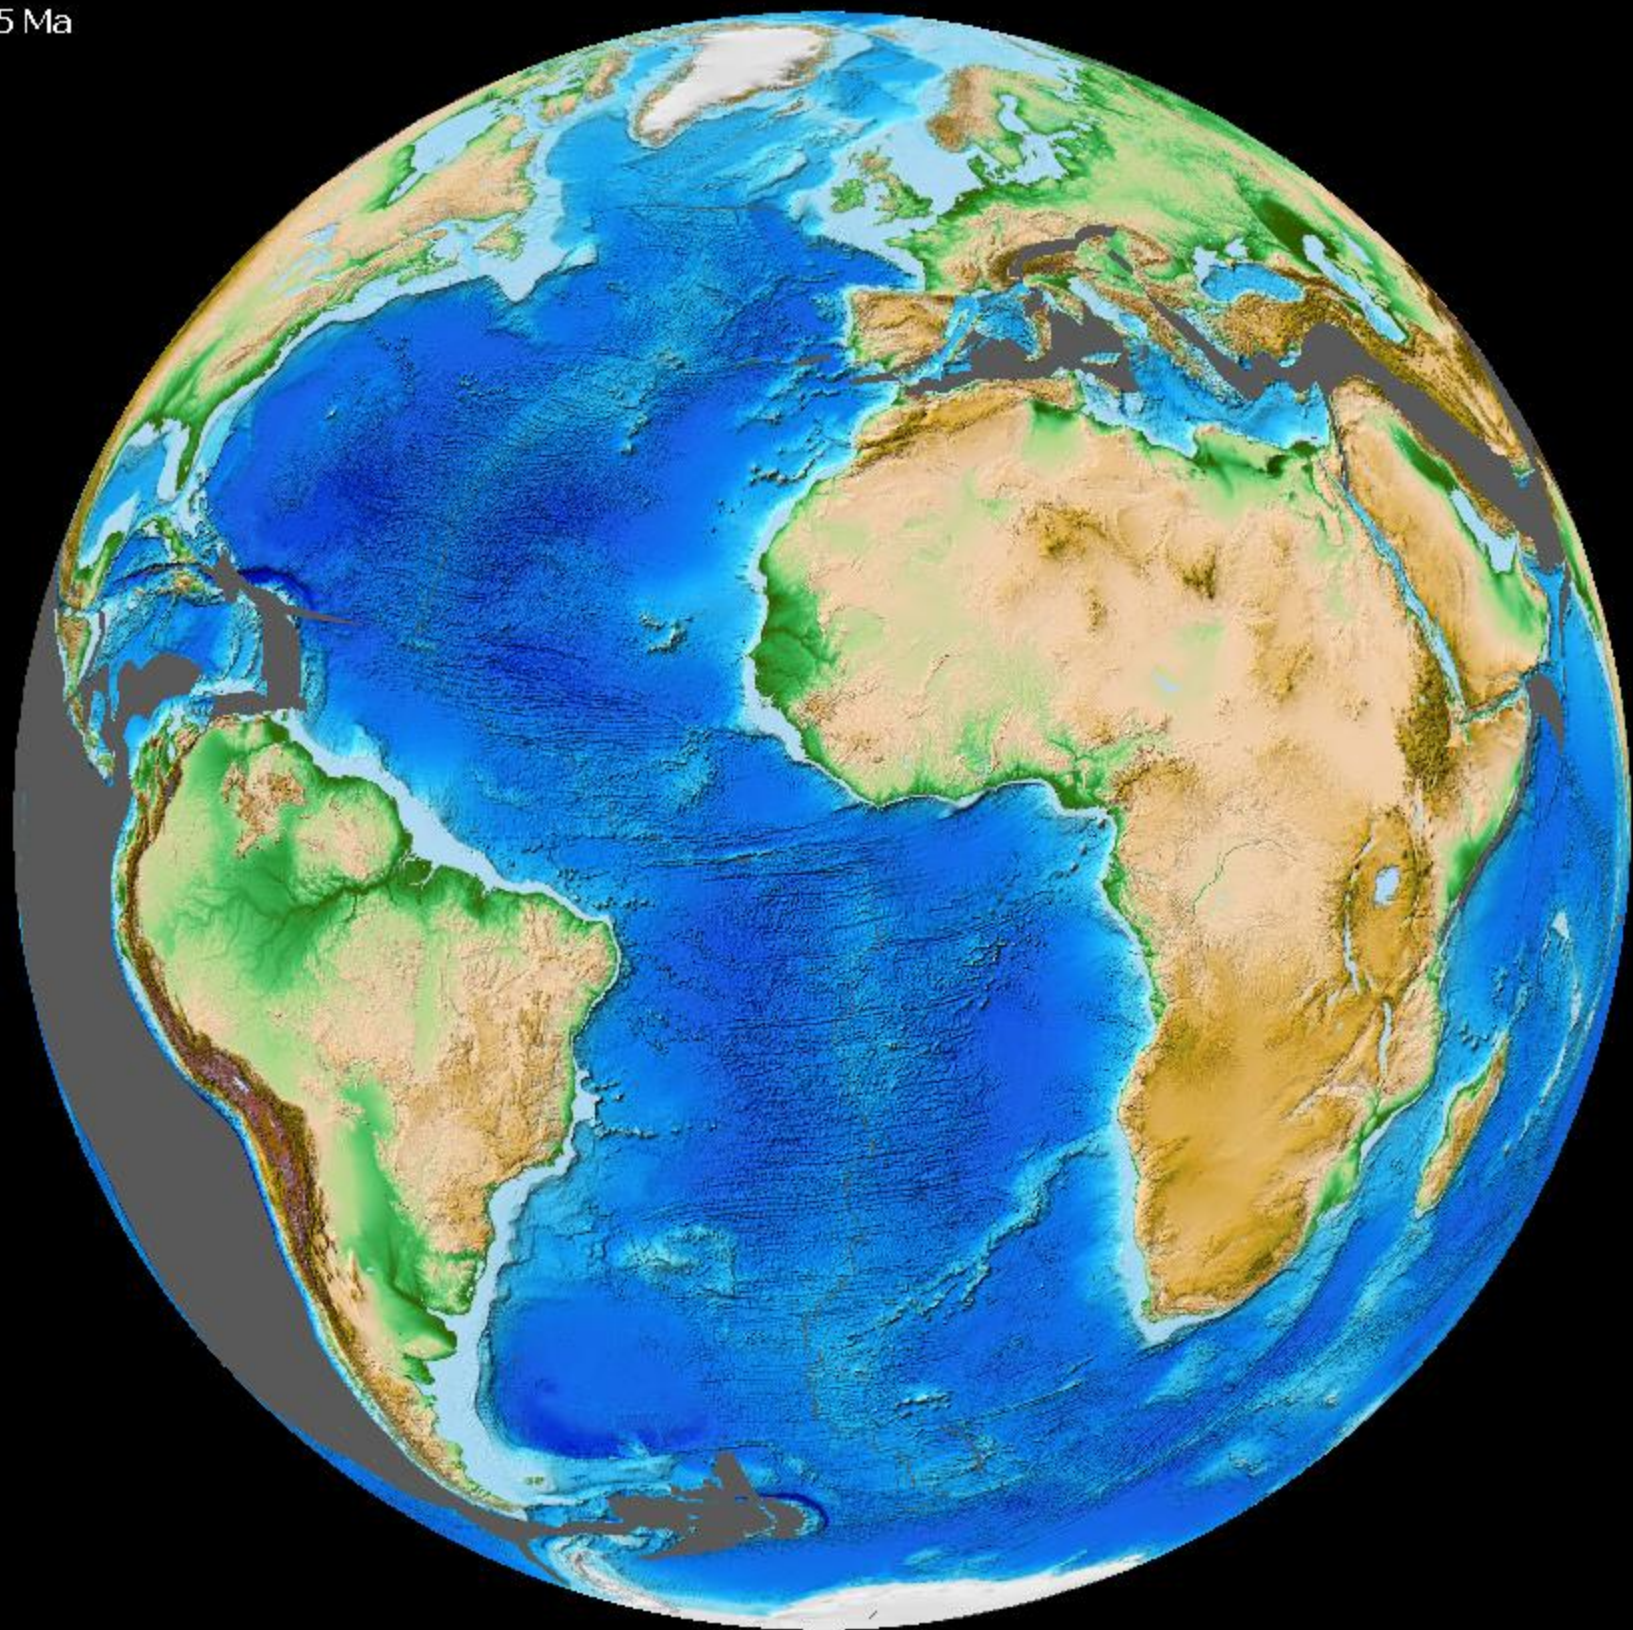



30 Ma

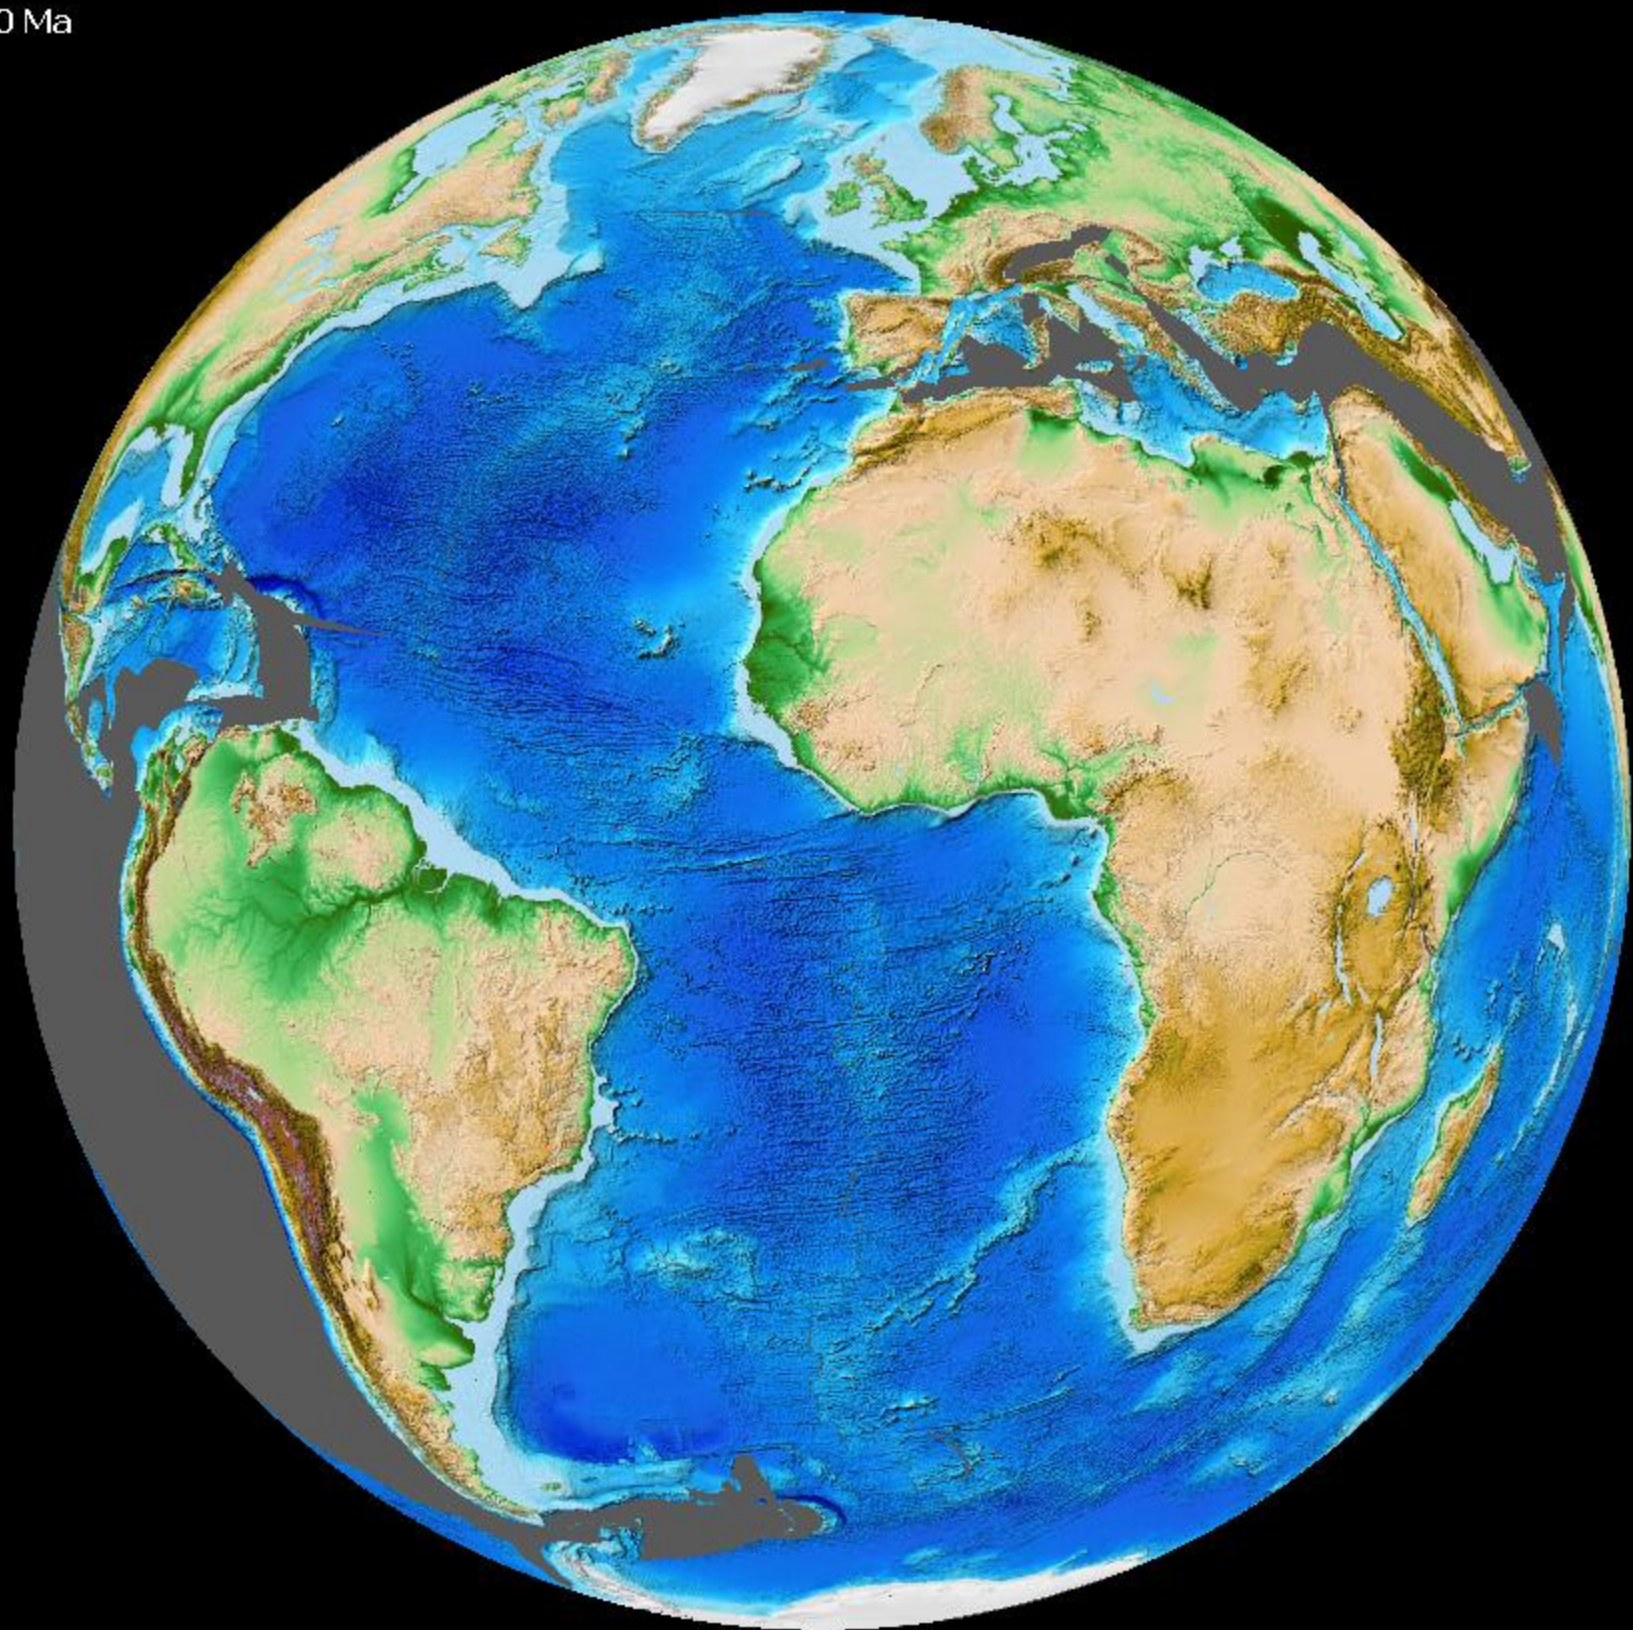



35 Ma

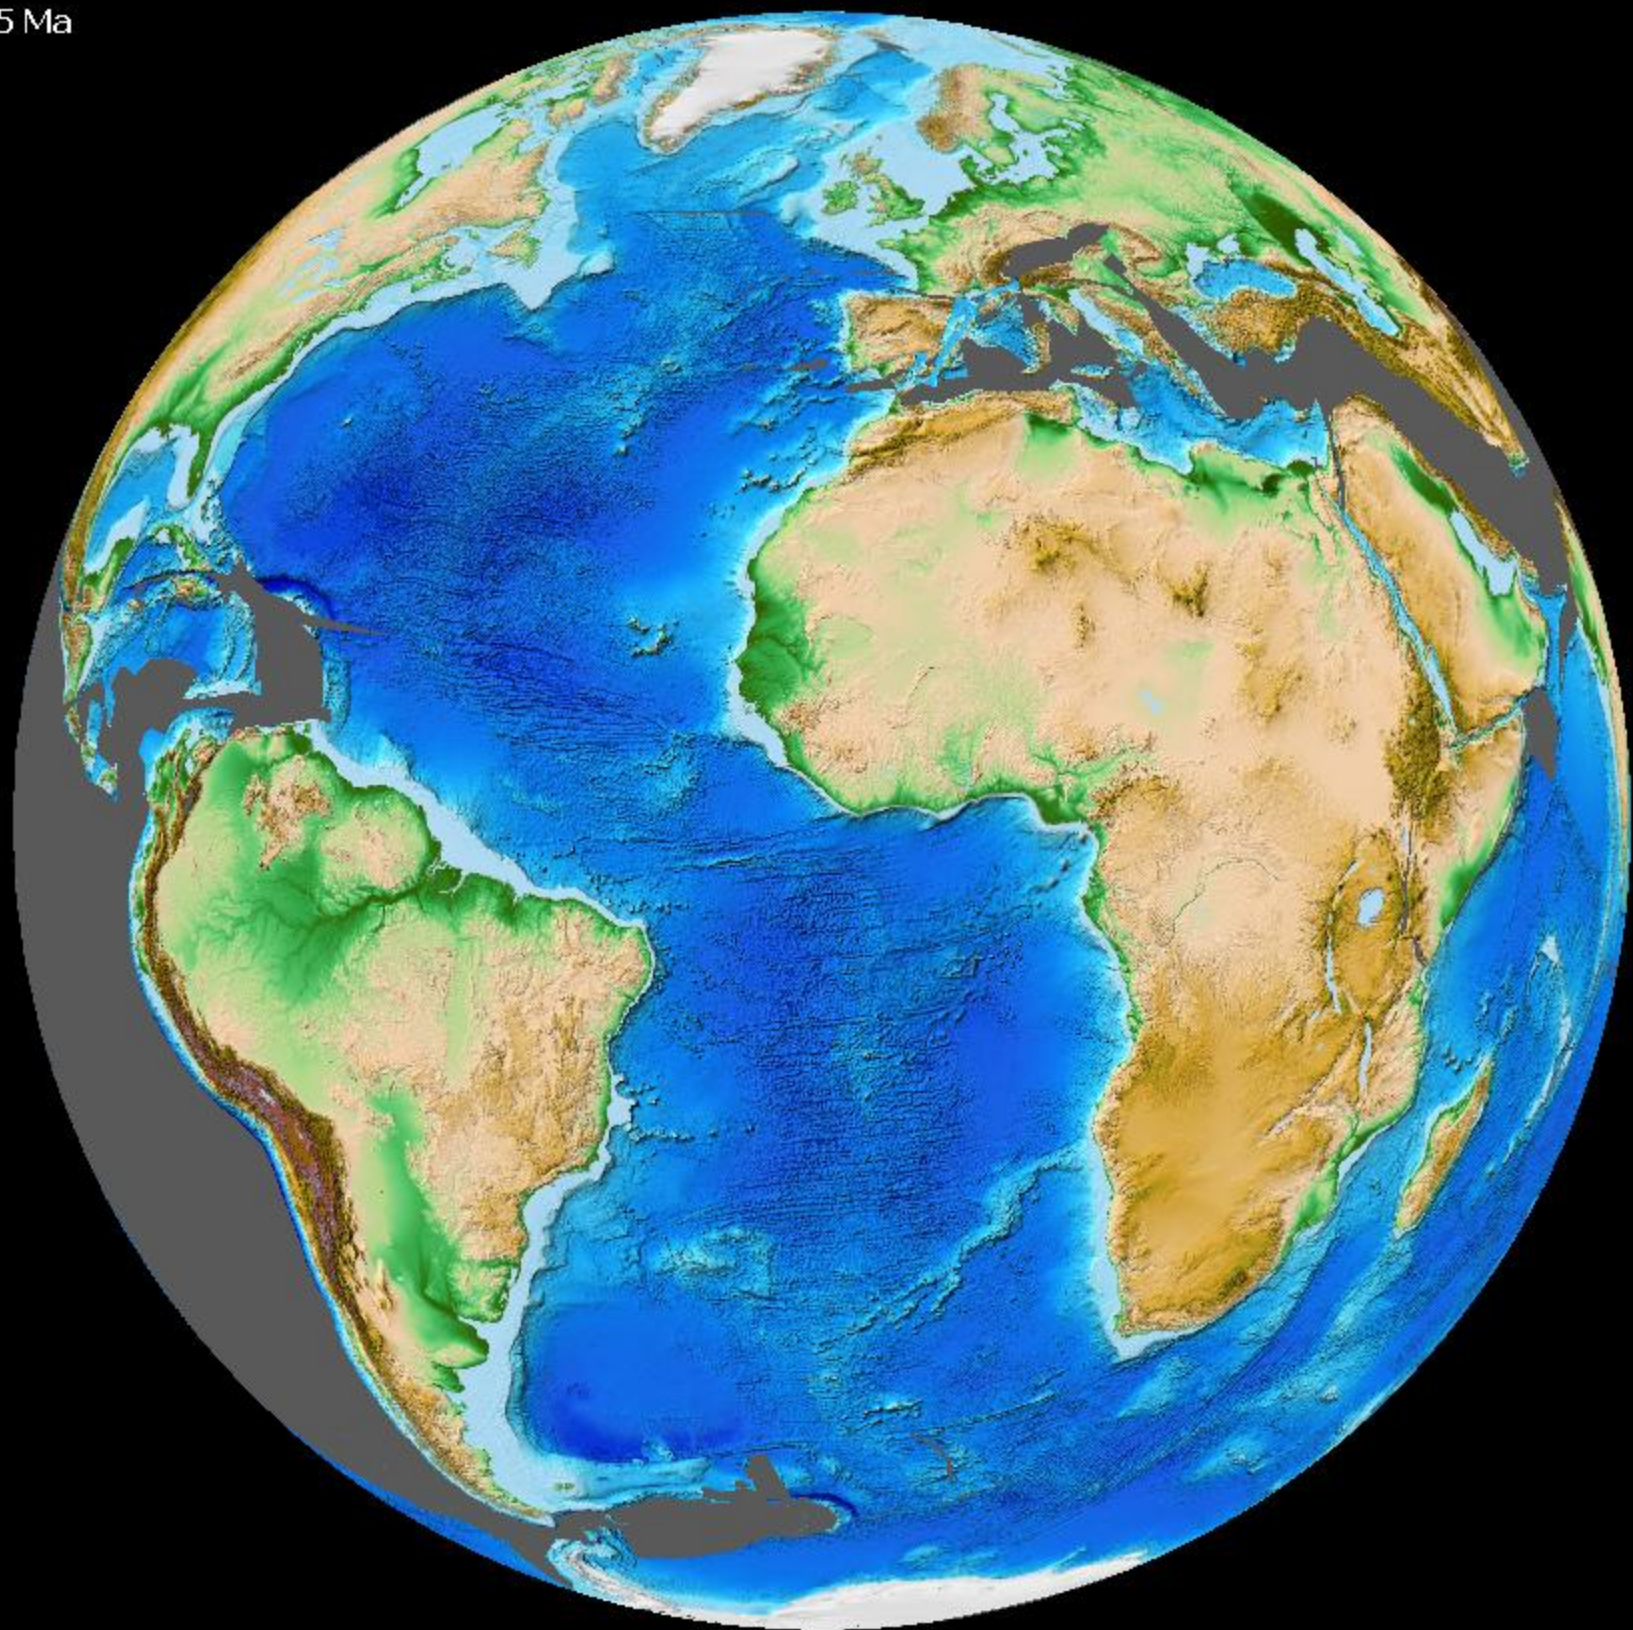



40 Ma

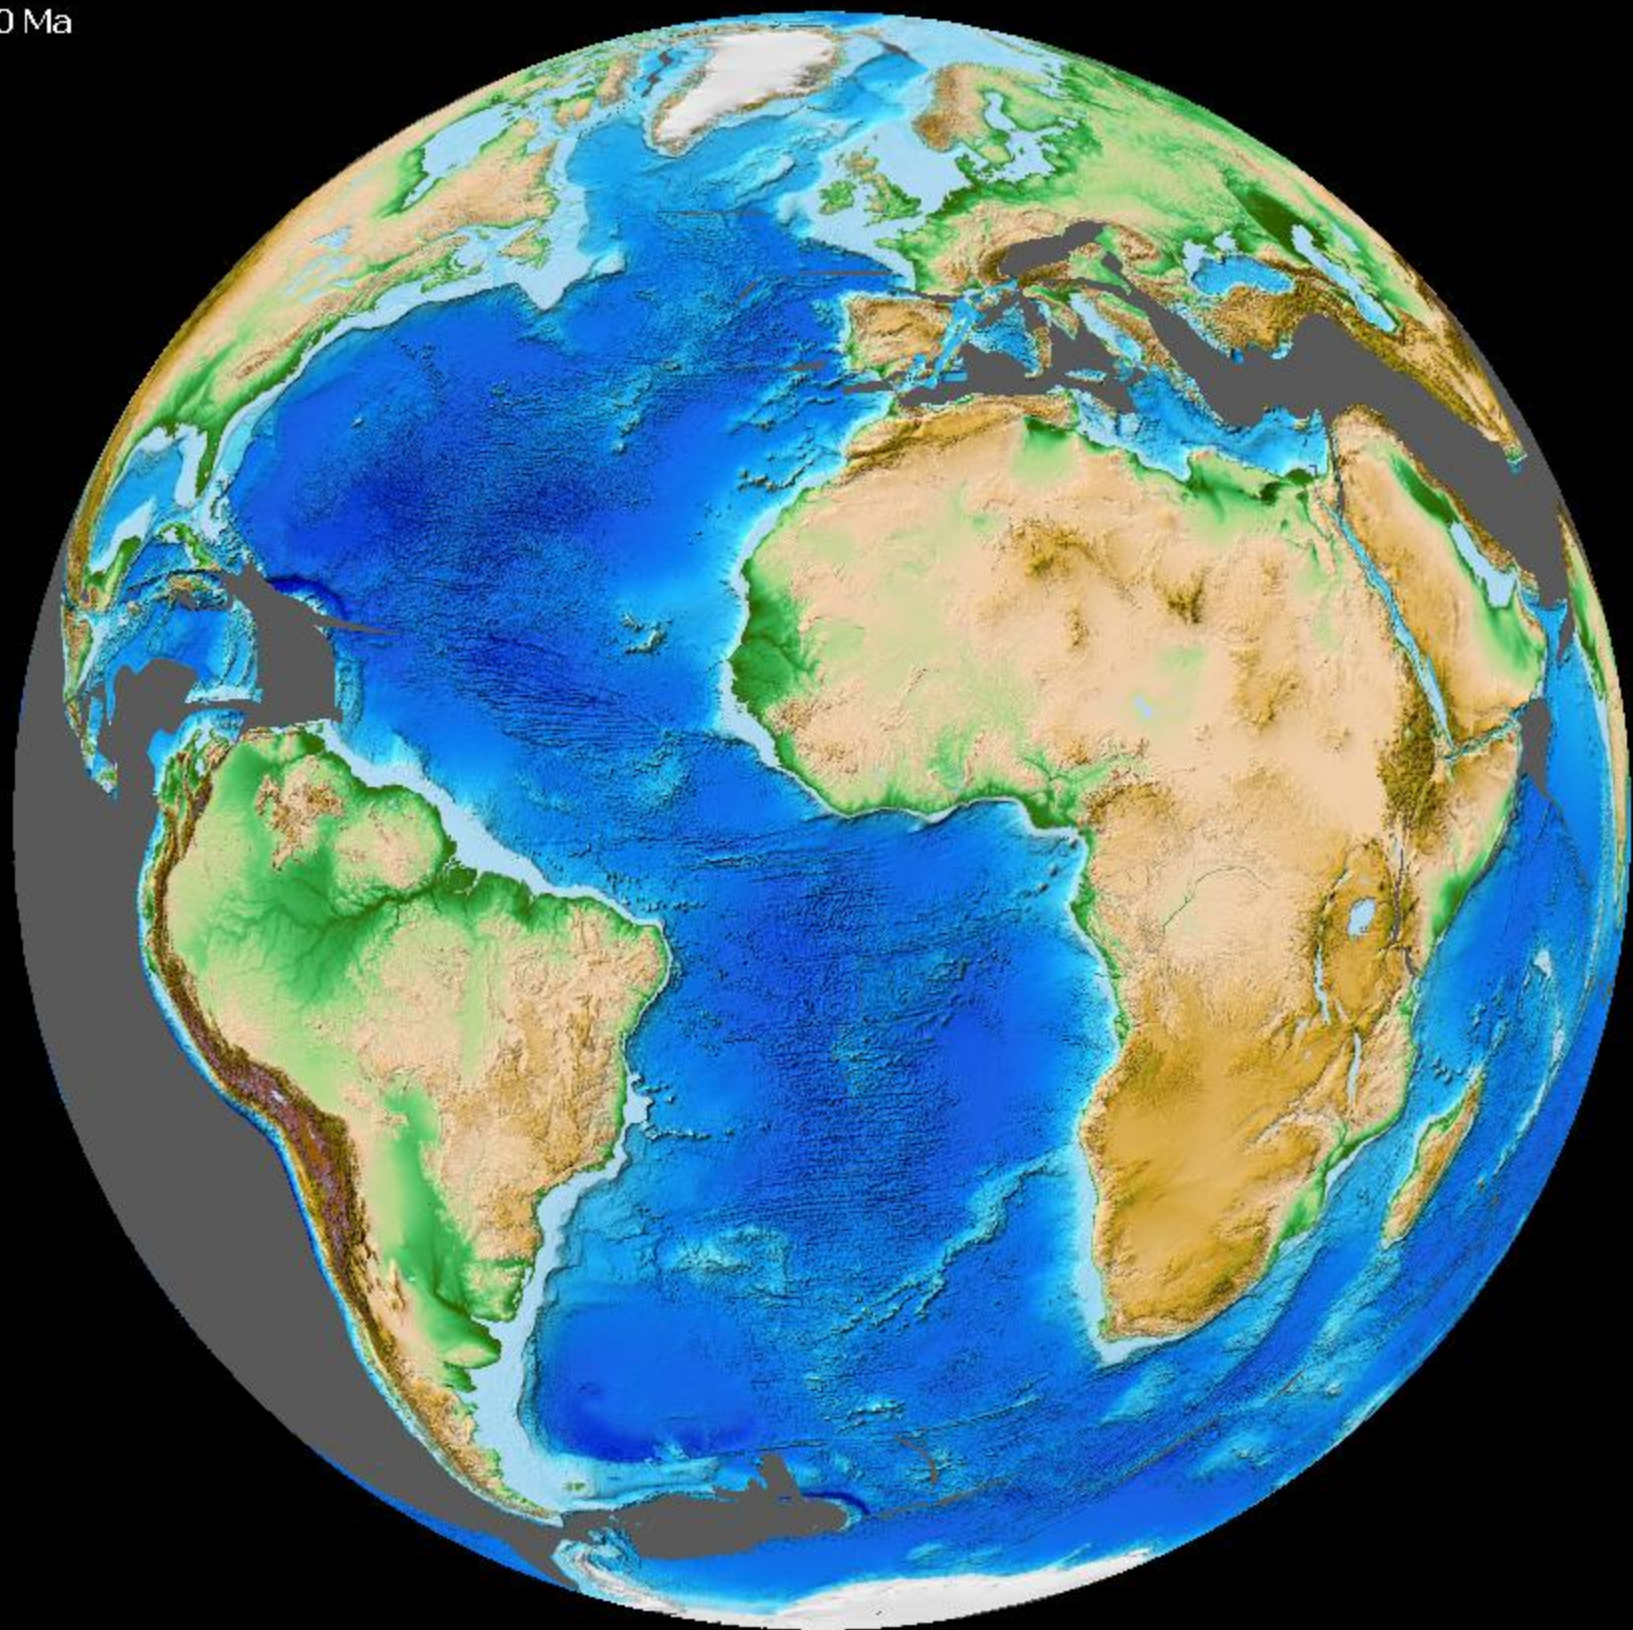



45 Ma

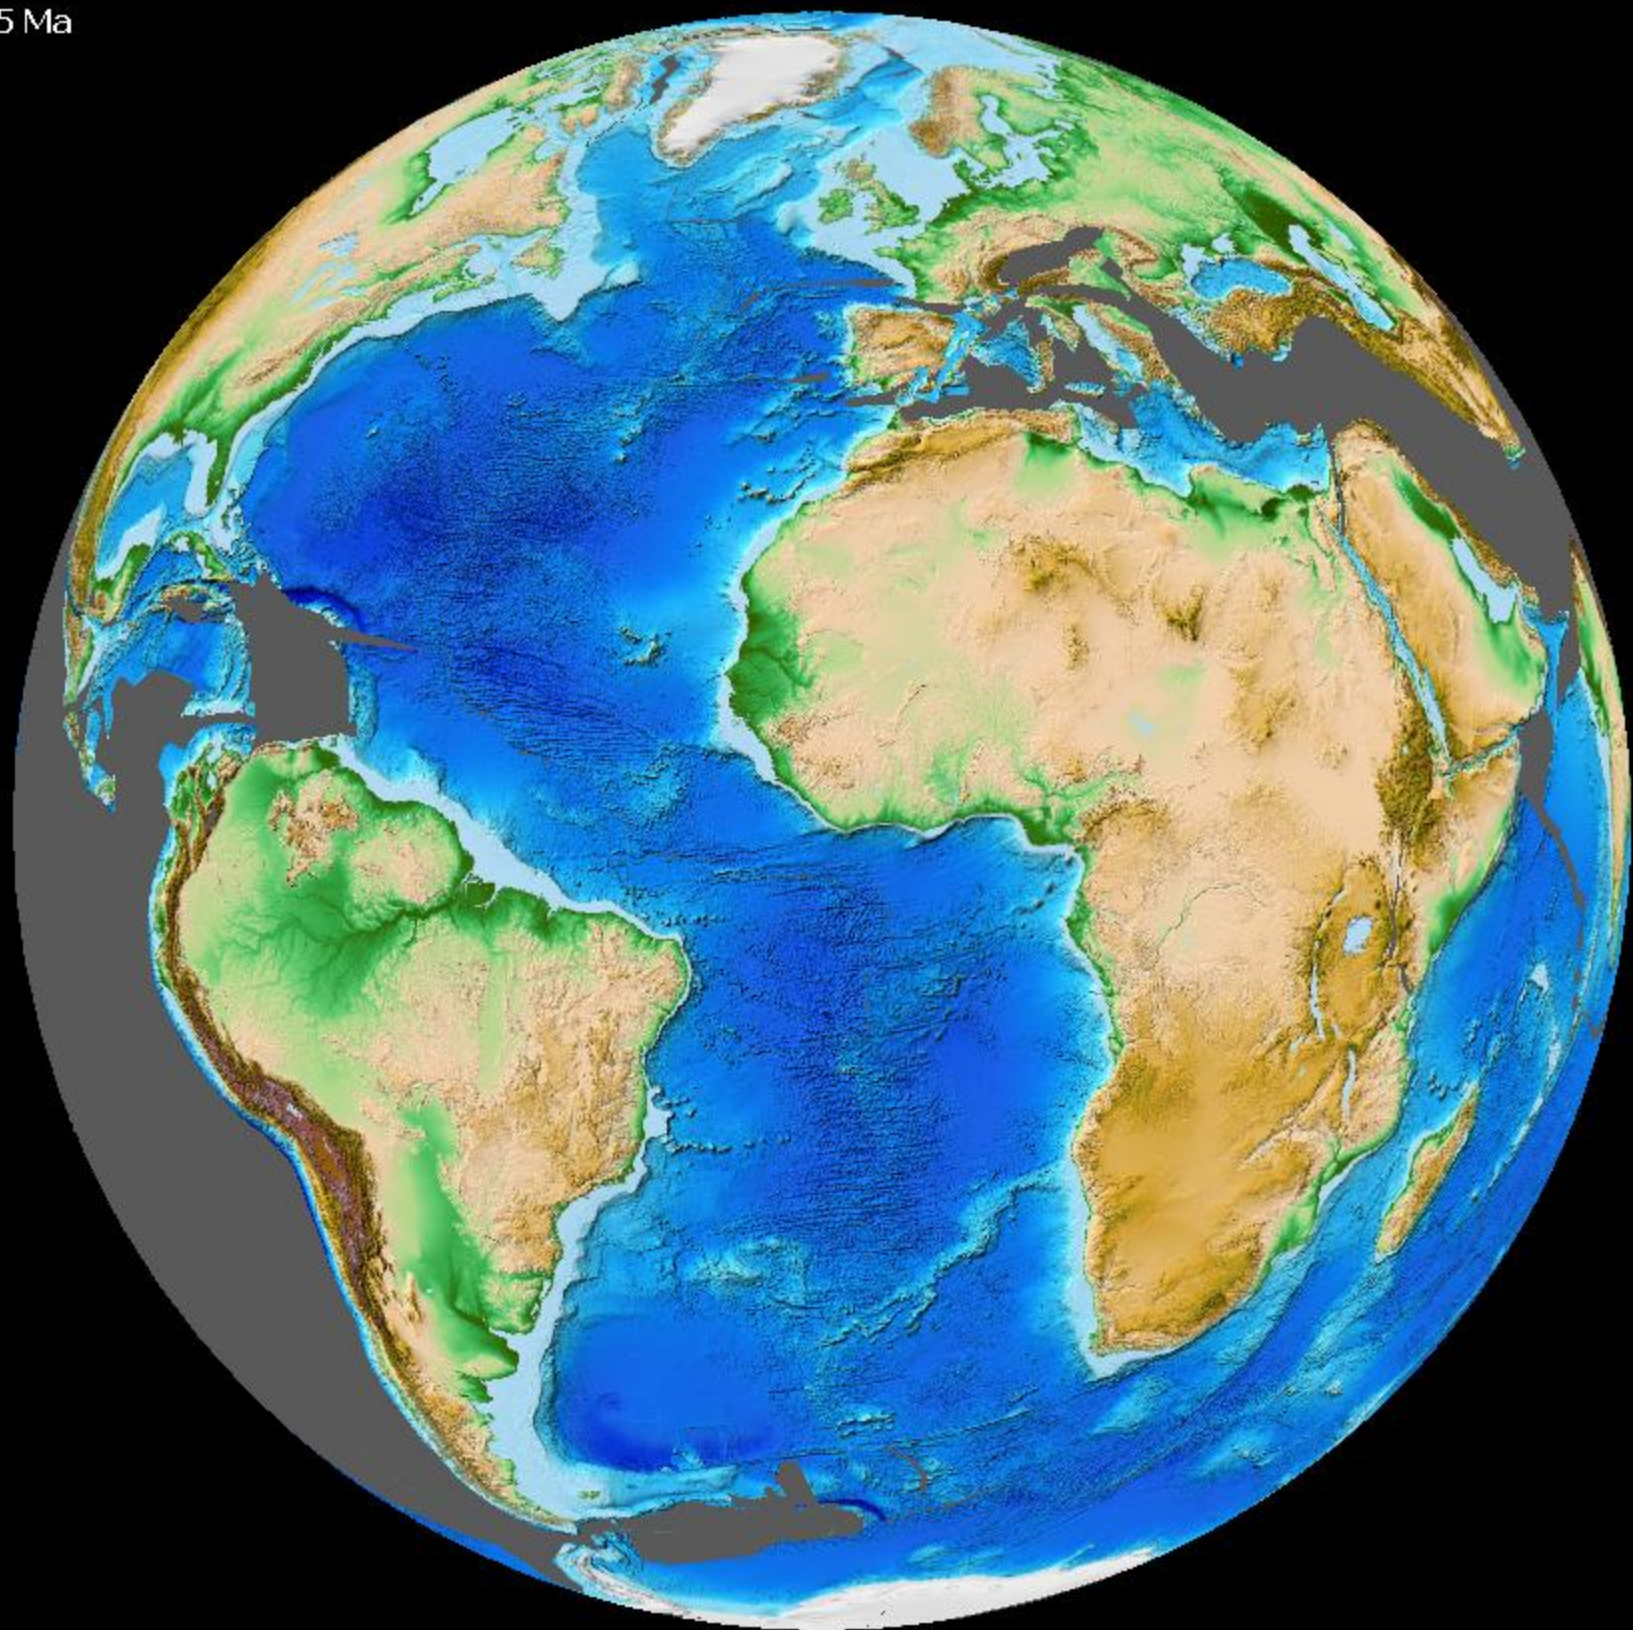



50 Ma

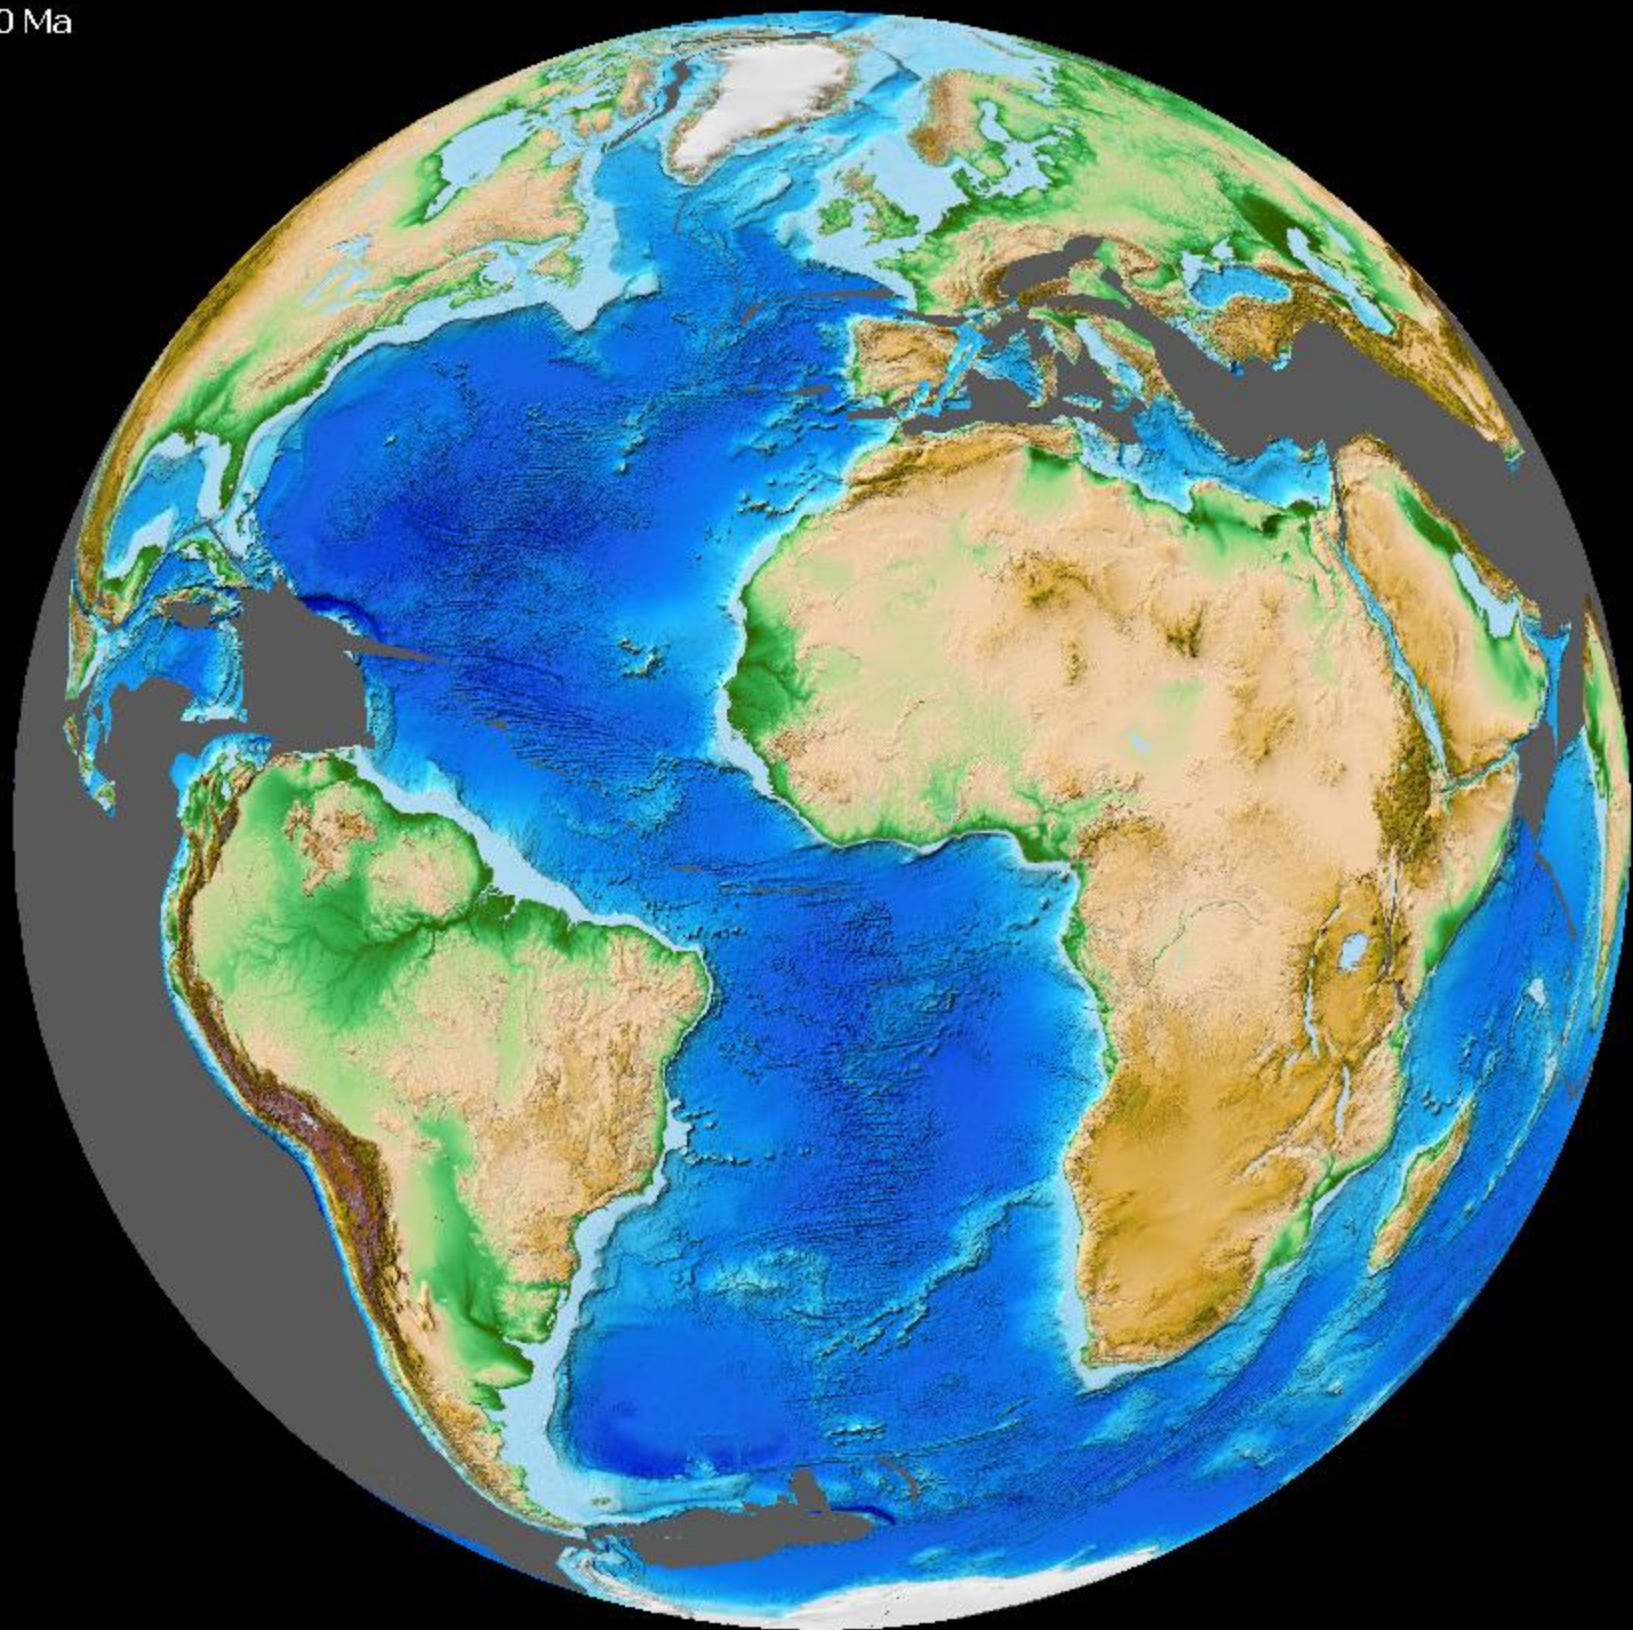



55 Ma

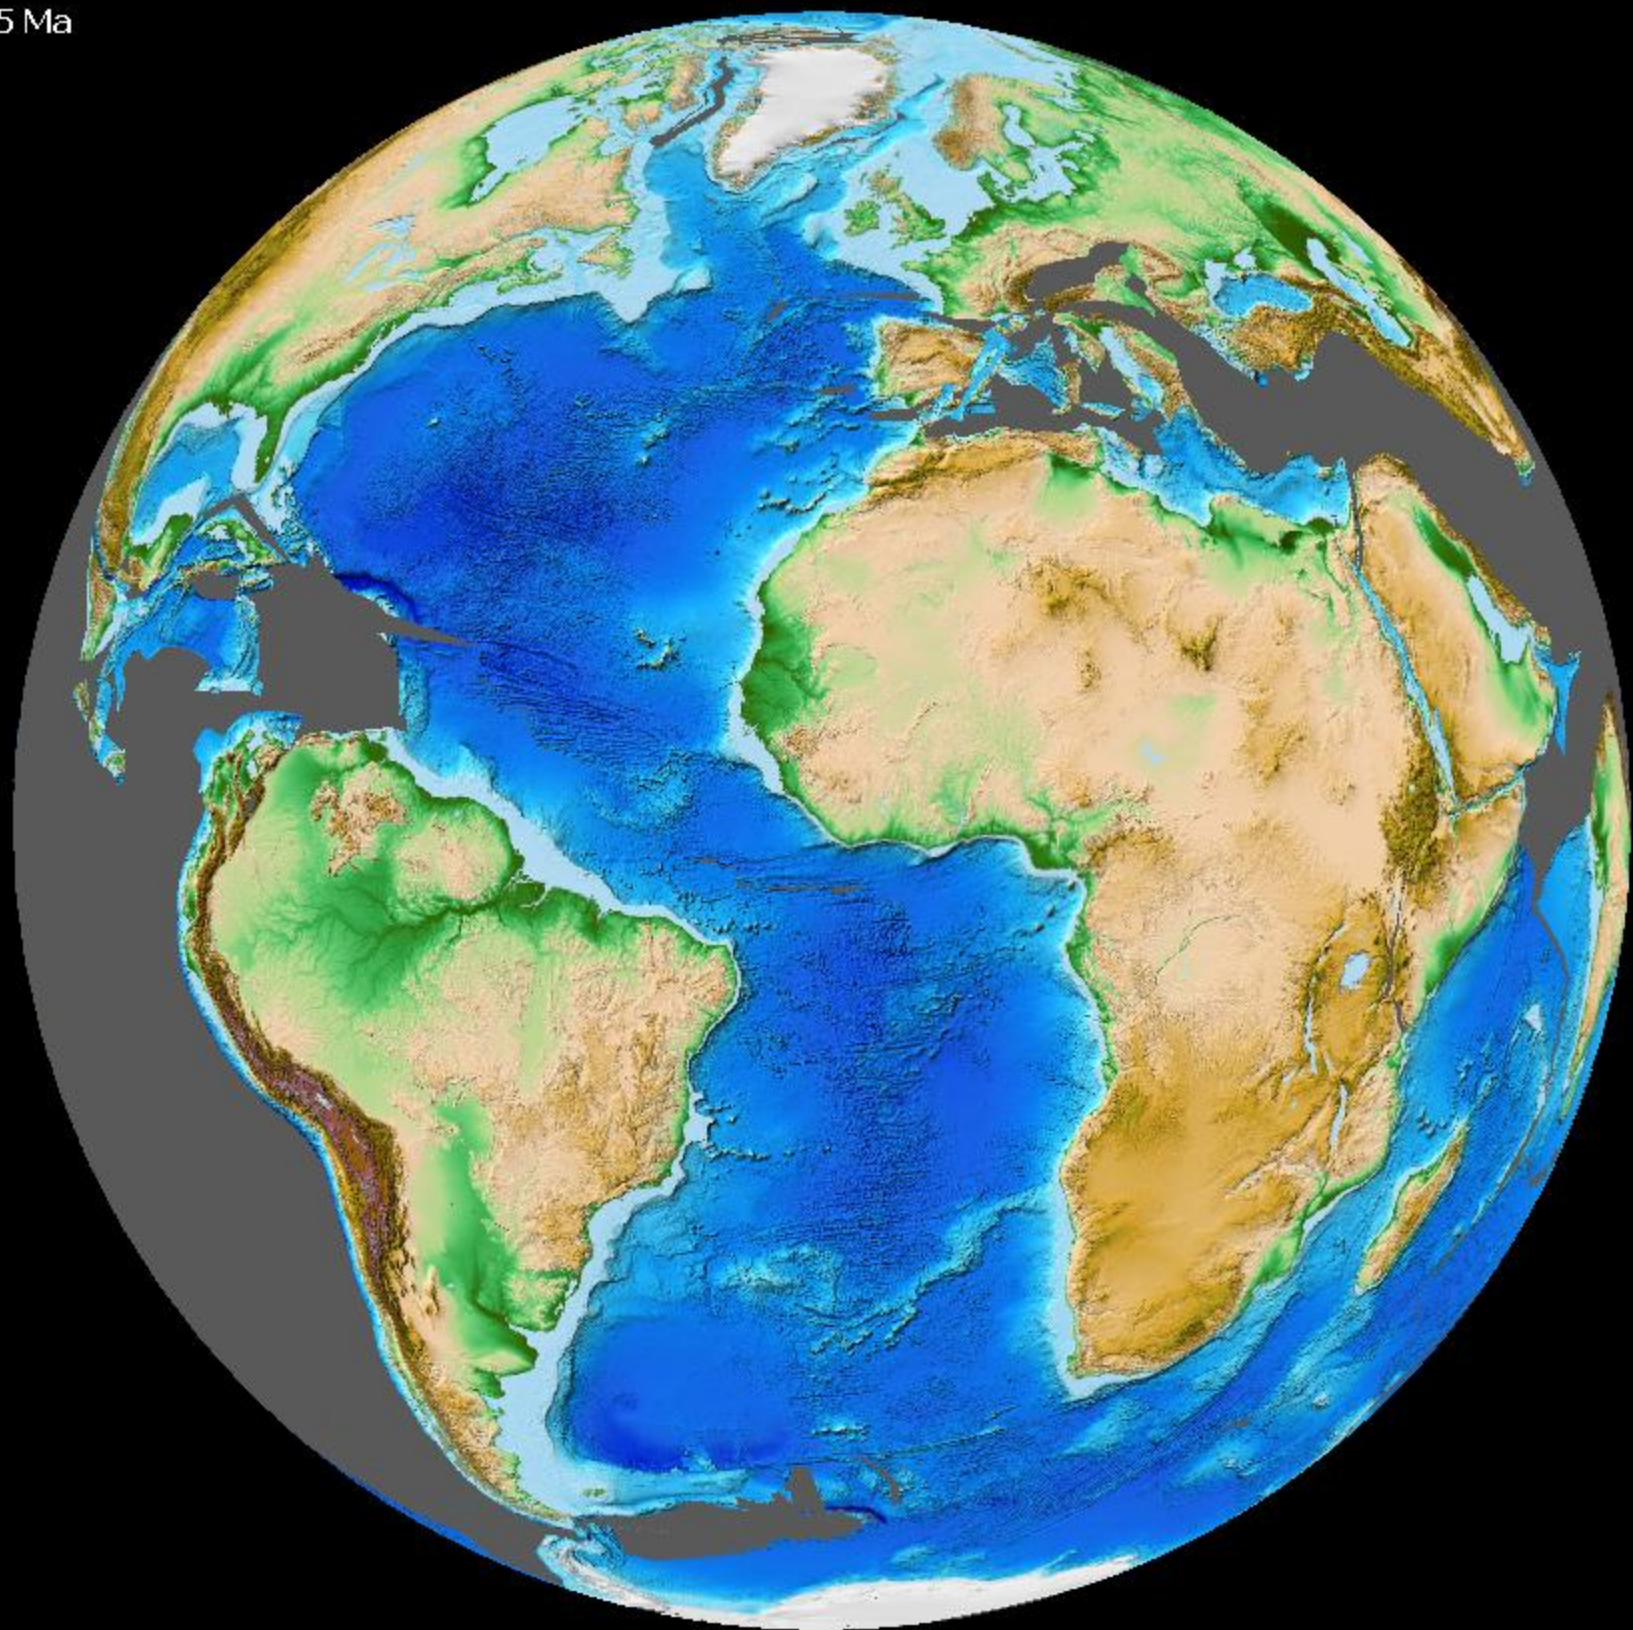



60 Ma

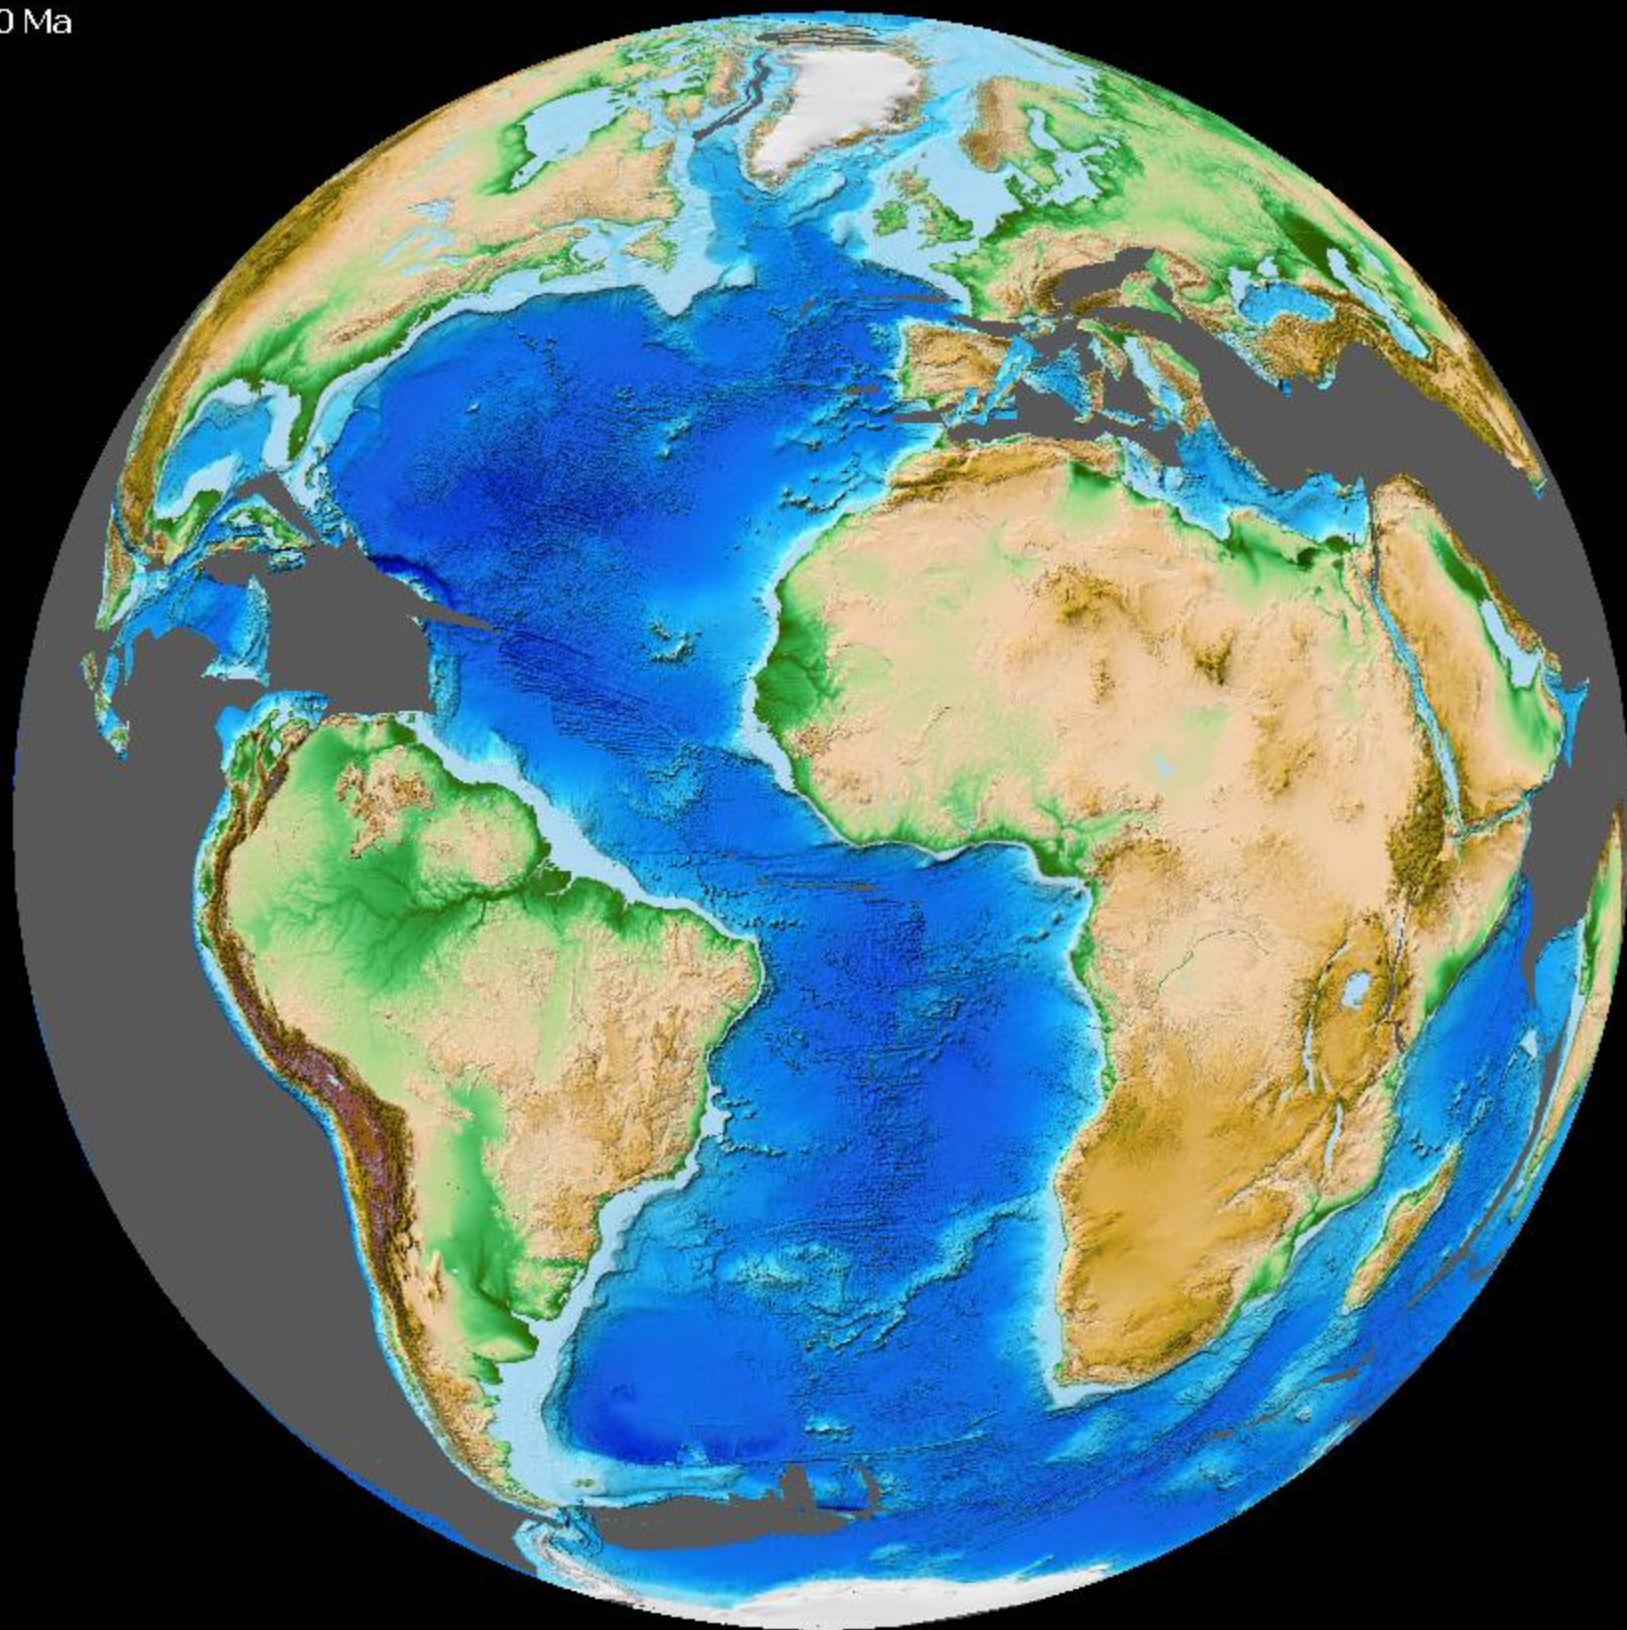



65 Ma

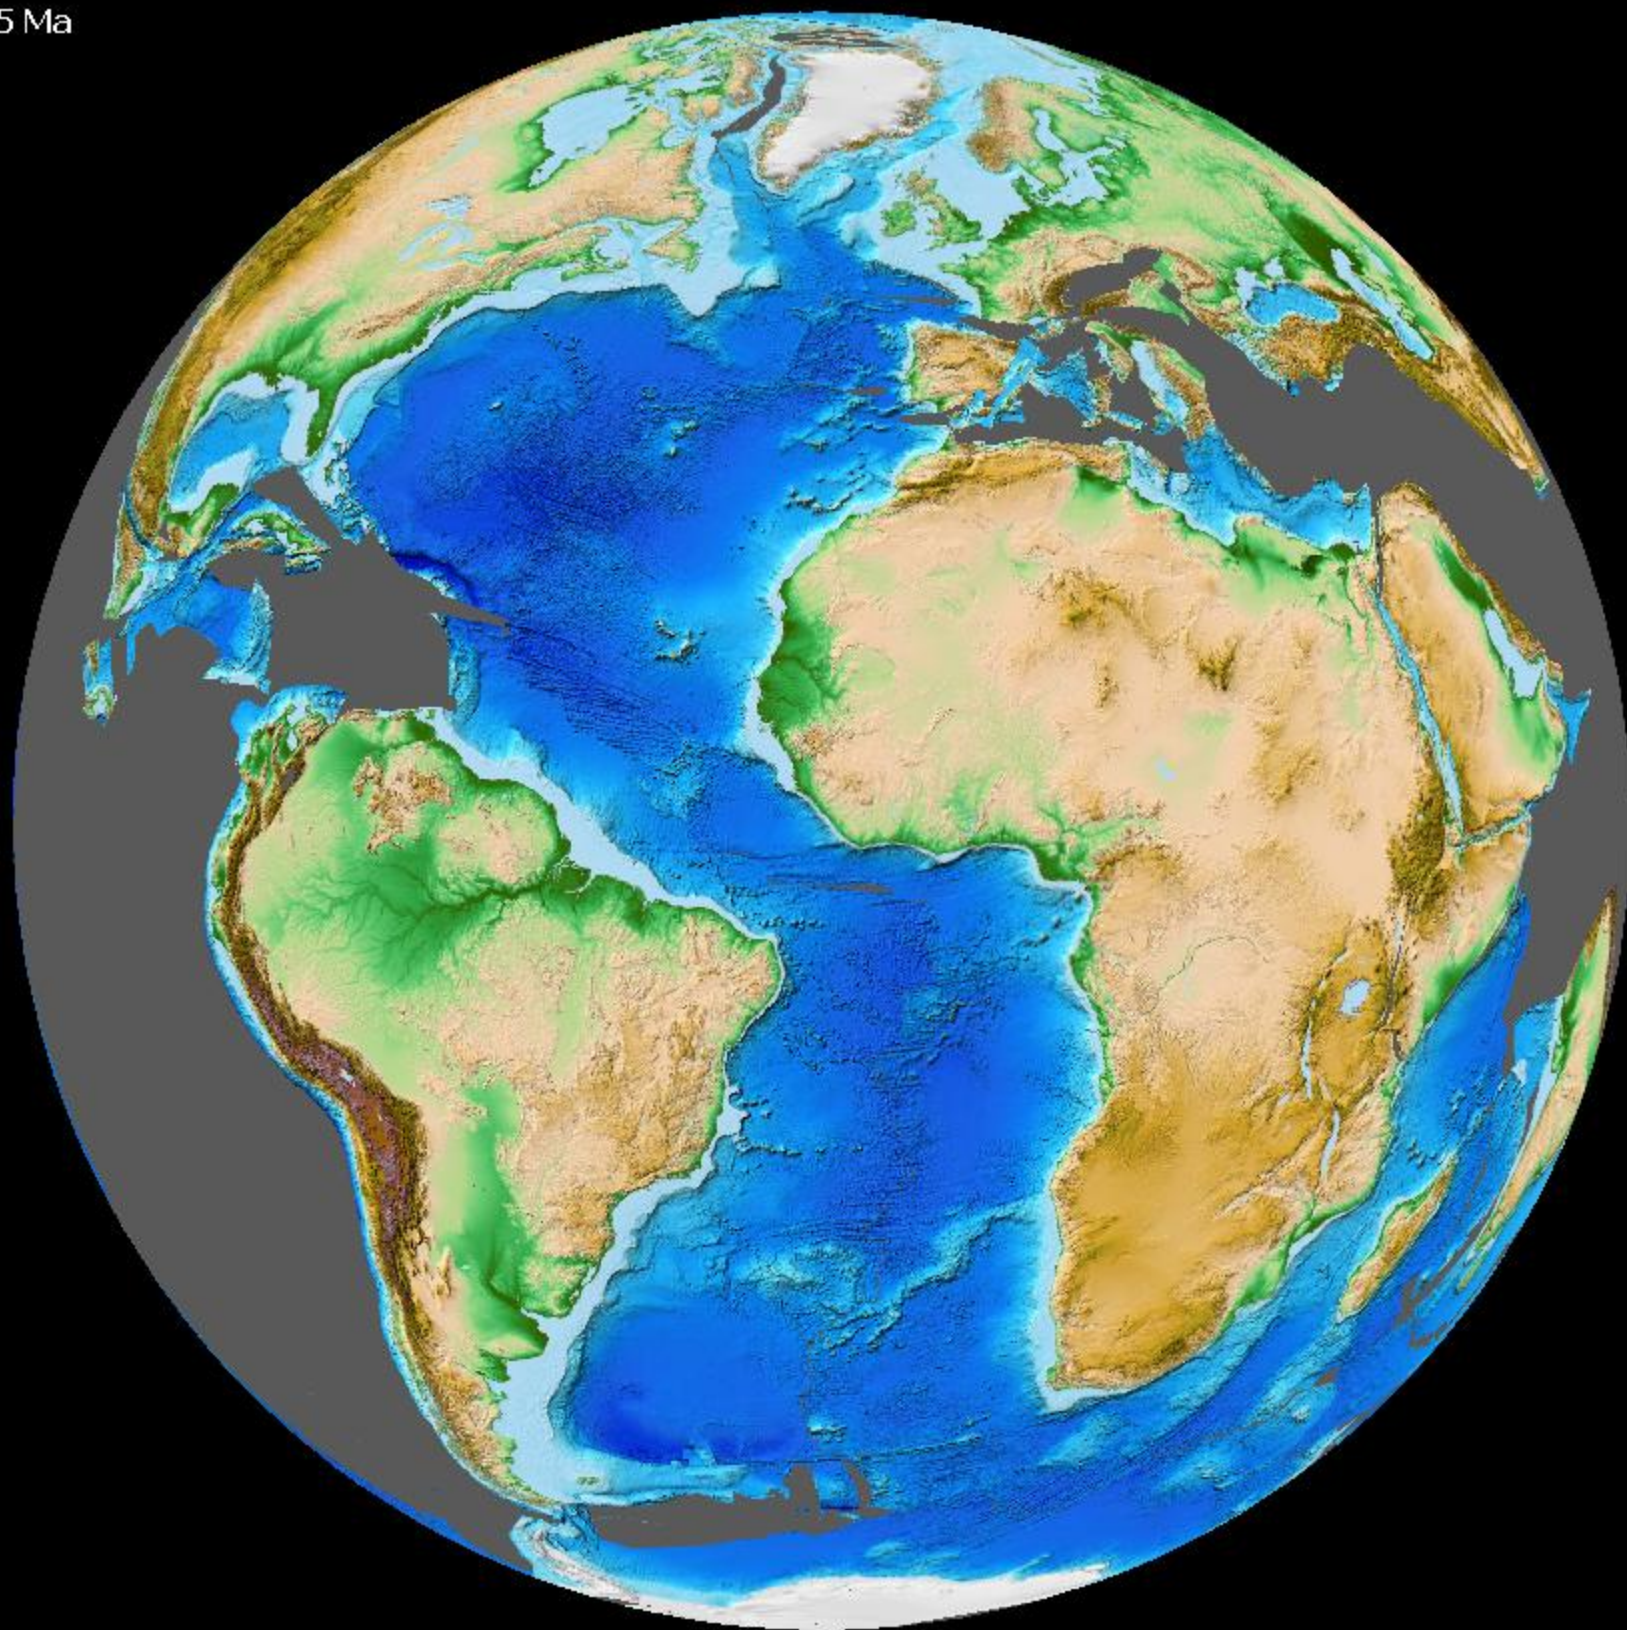



70 Ma

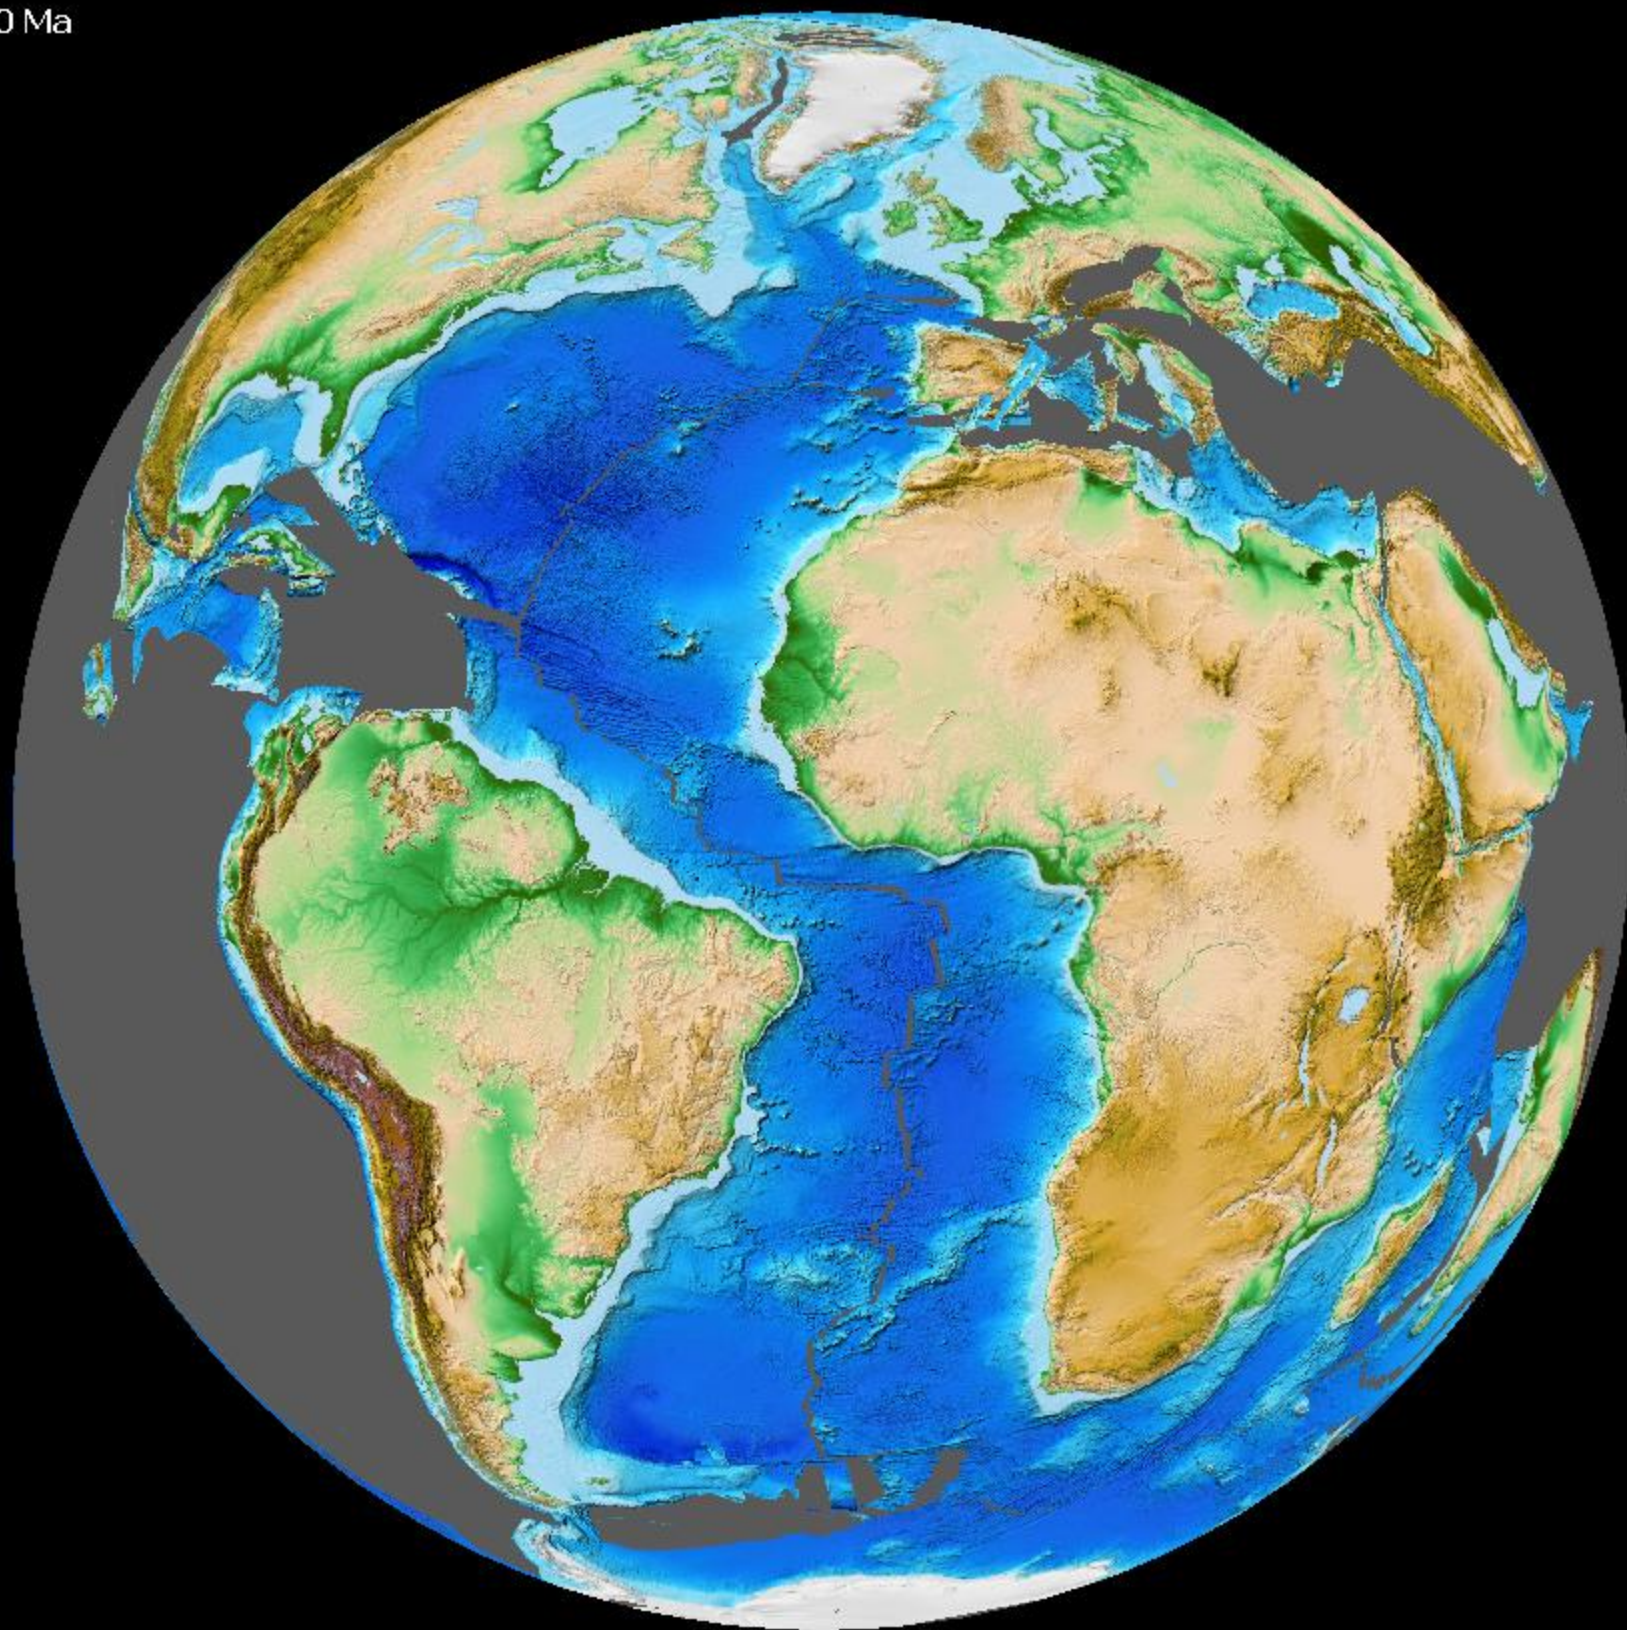



75 Ma

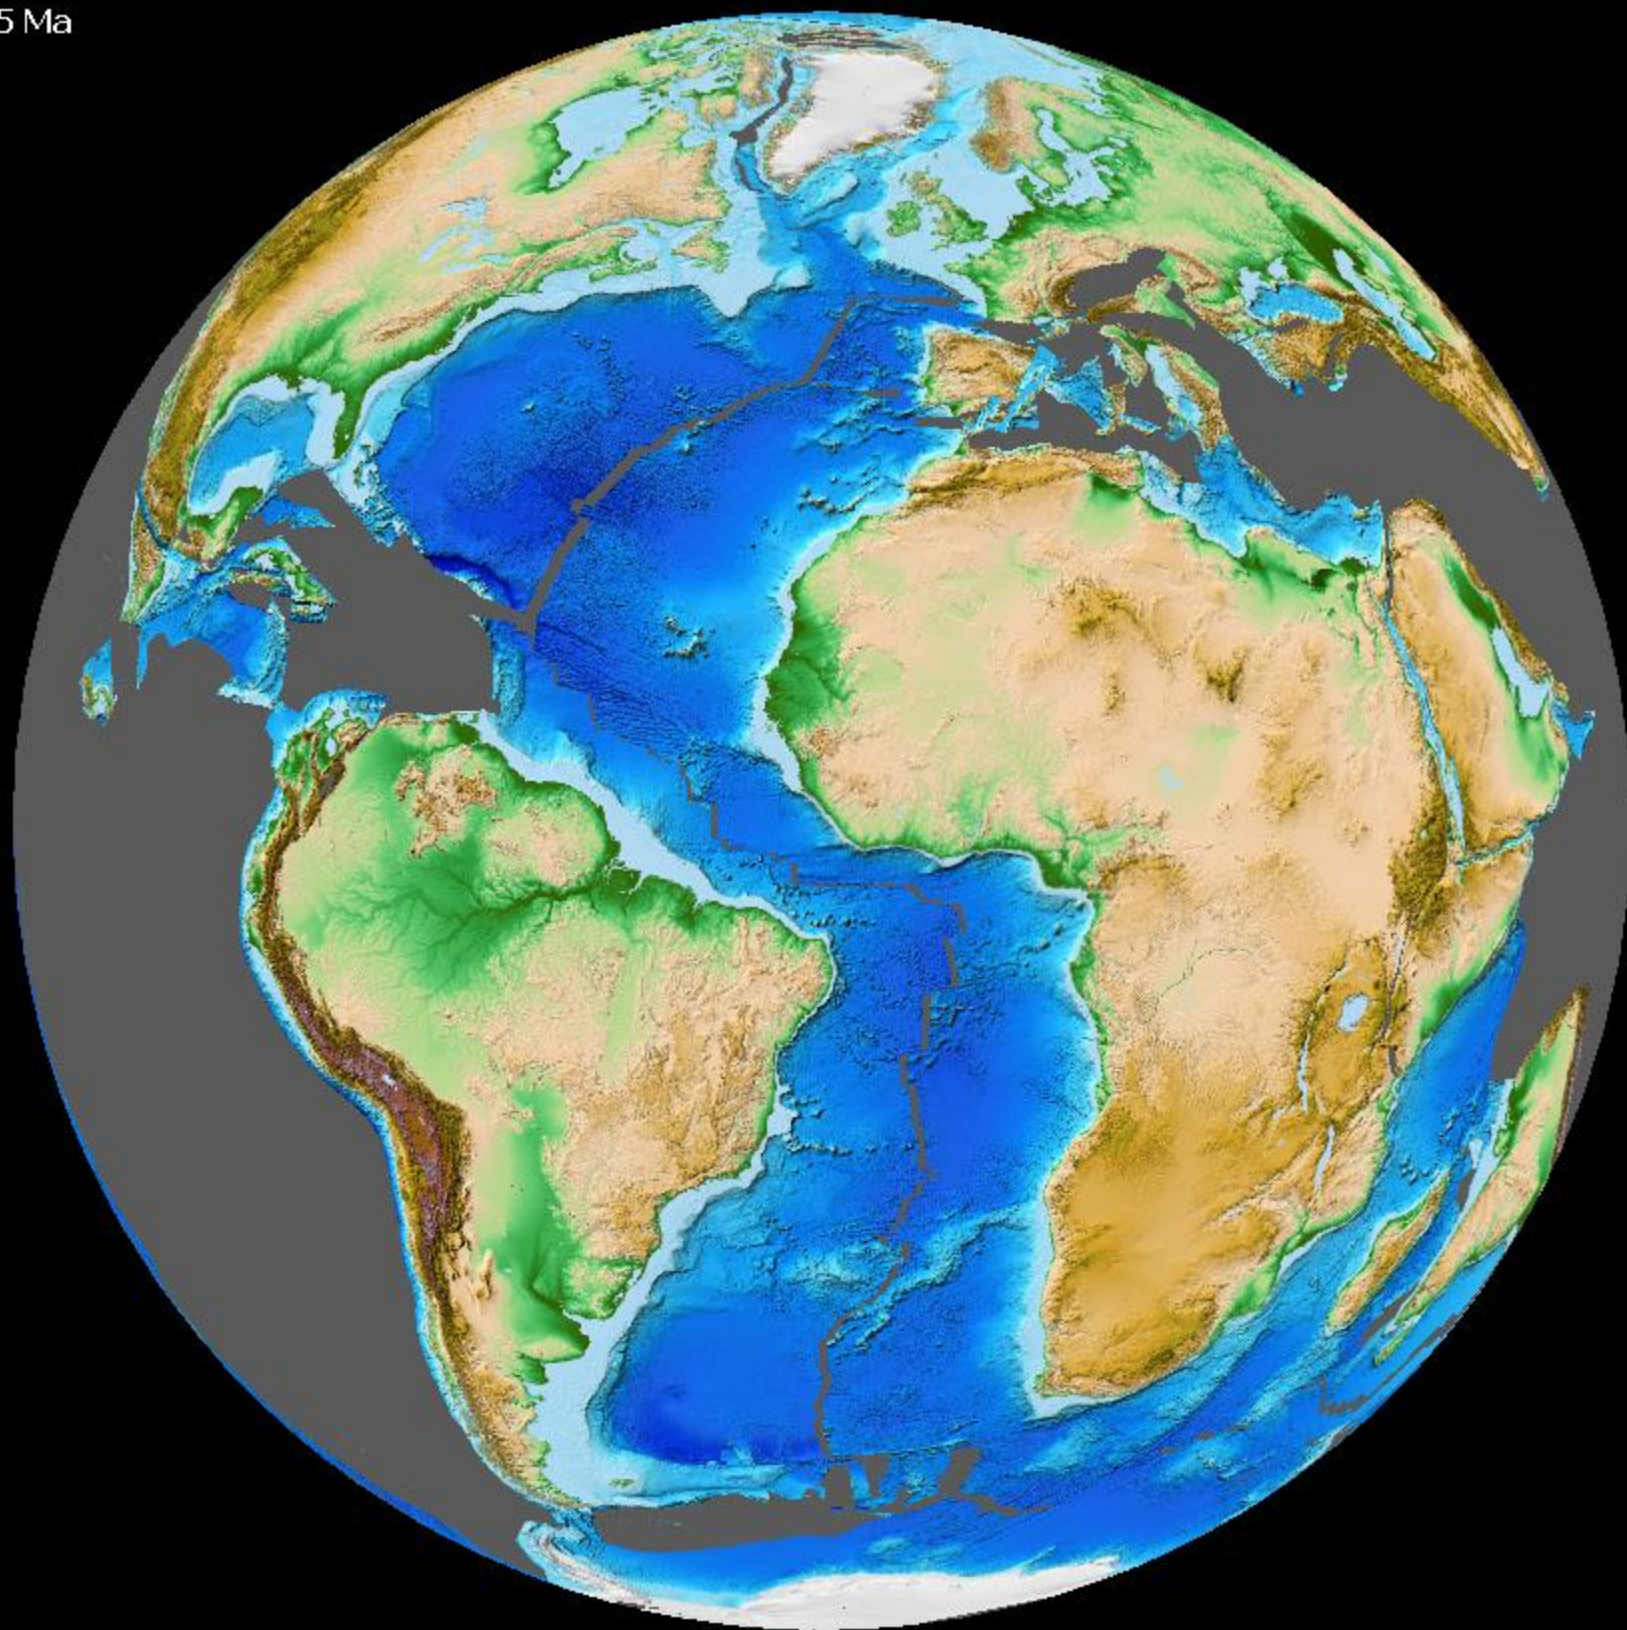



80 Ma

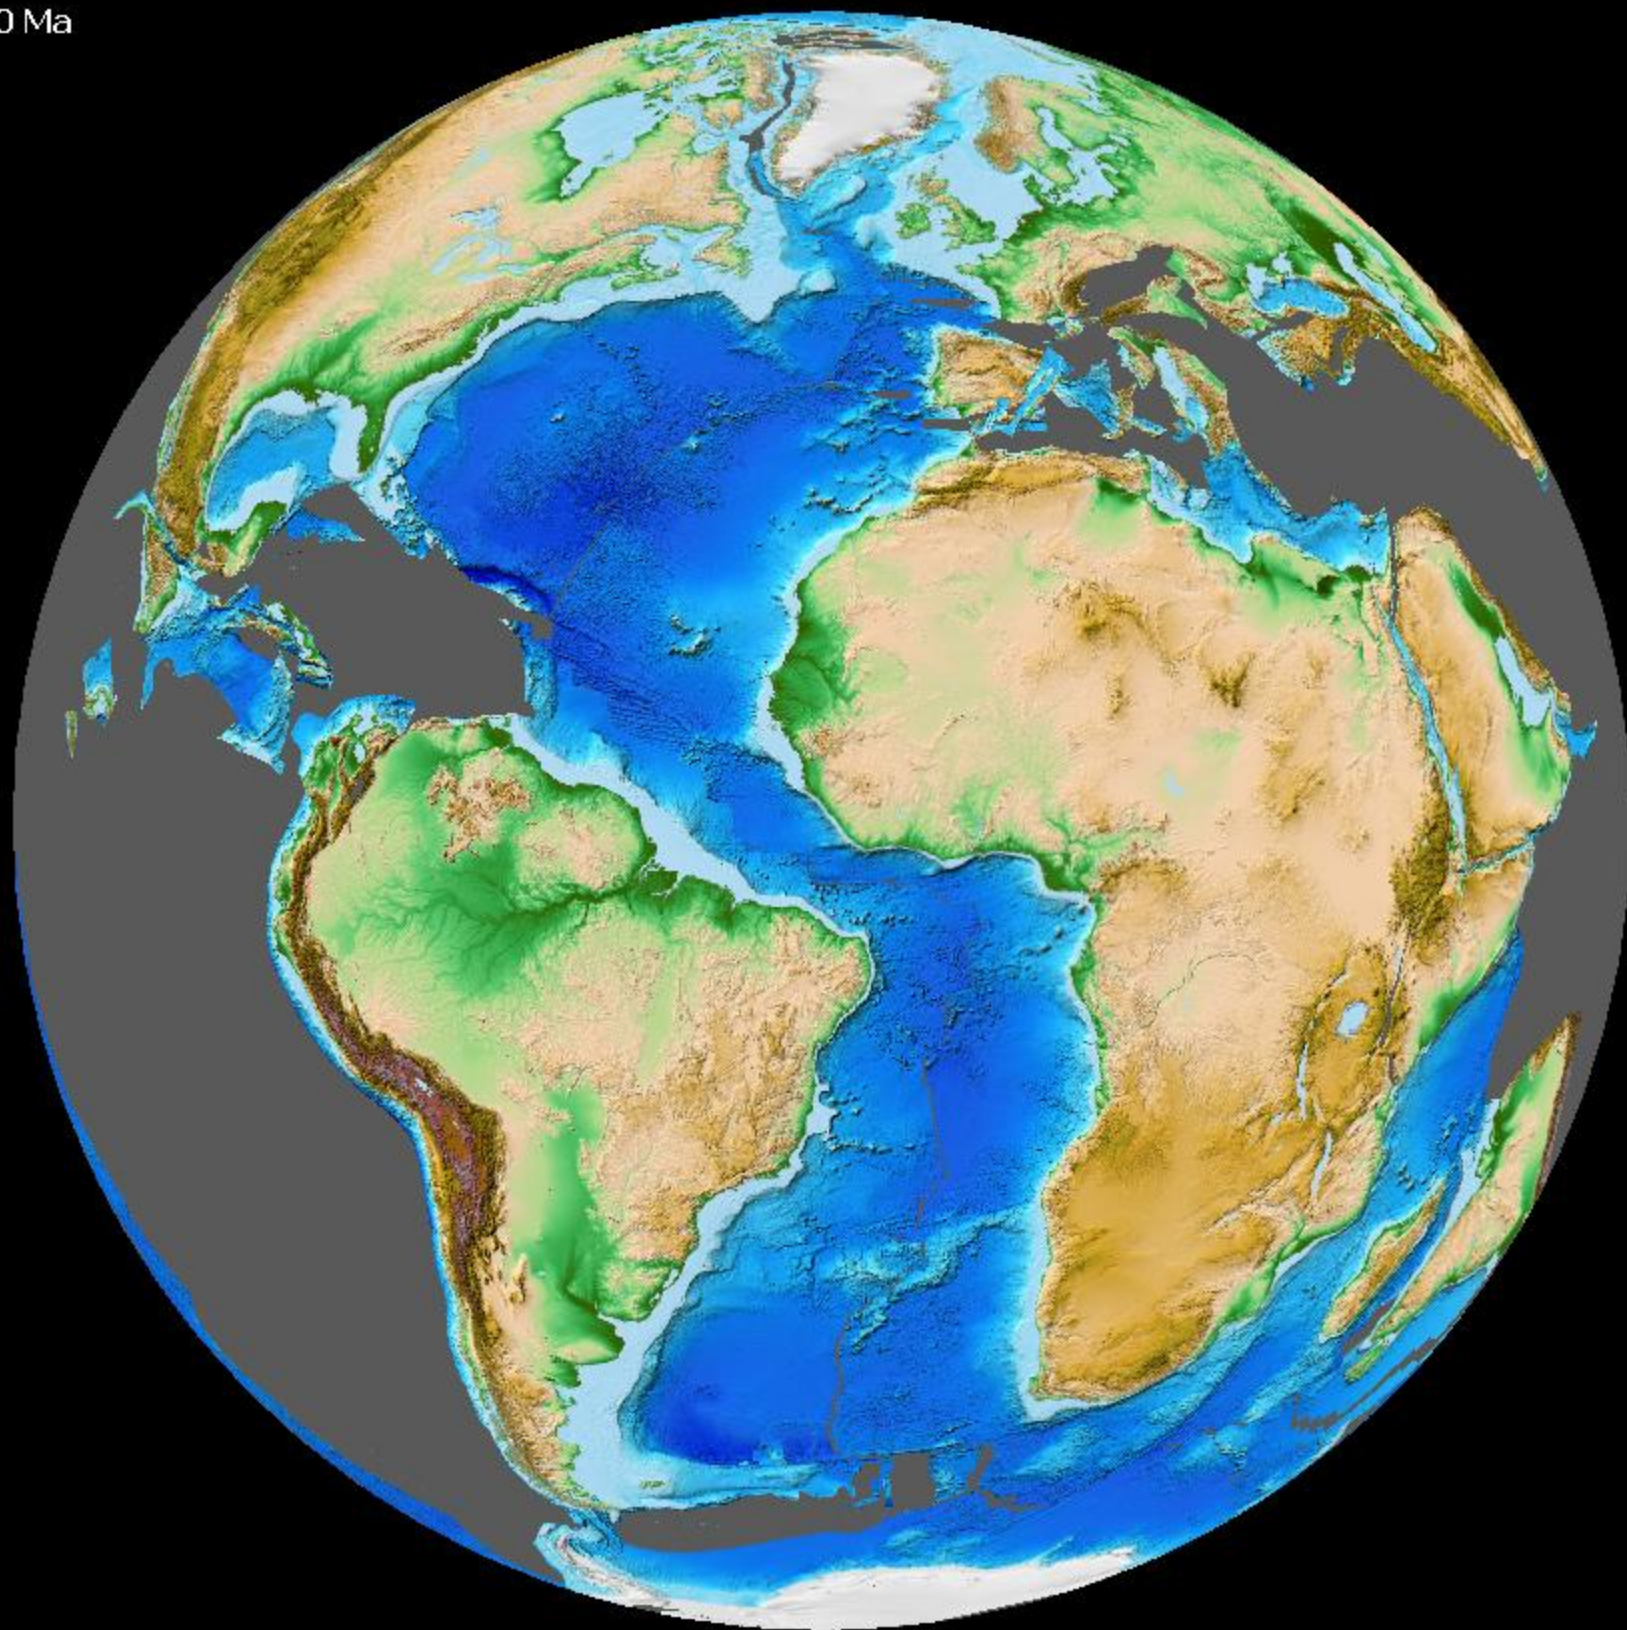



85 Ma

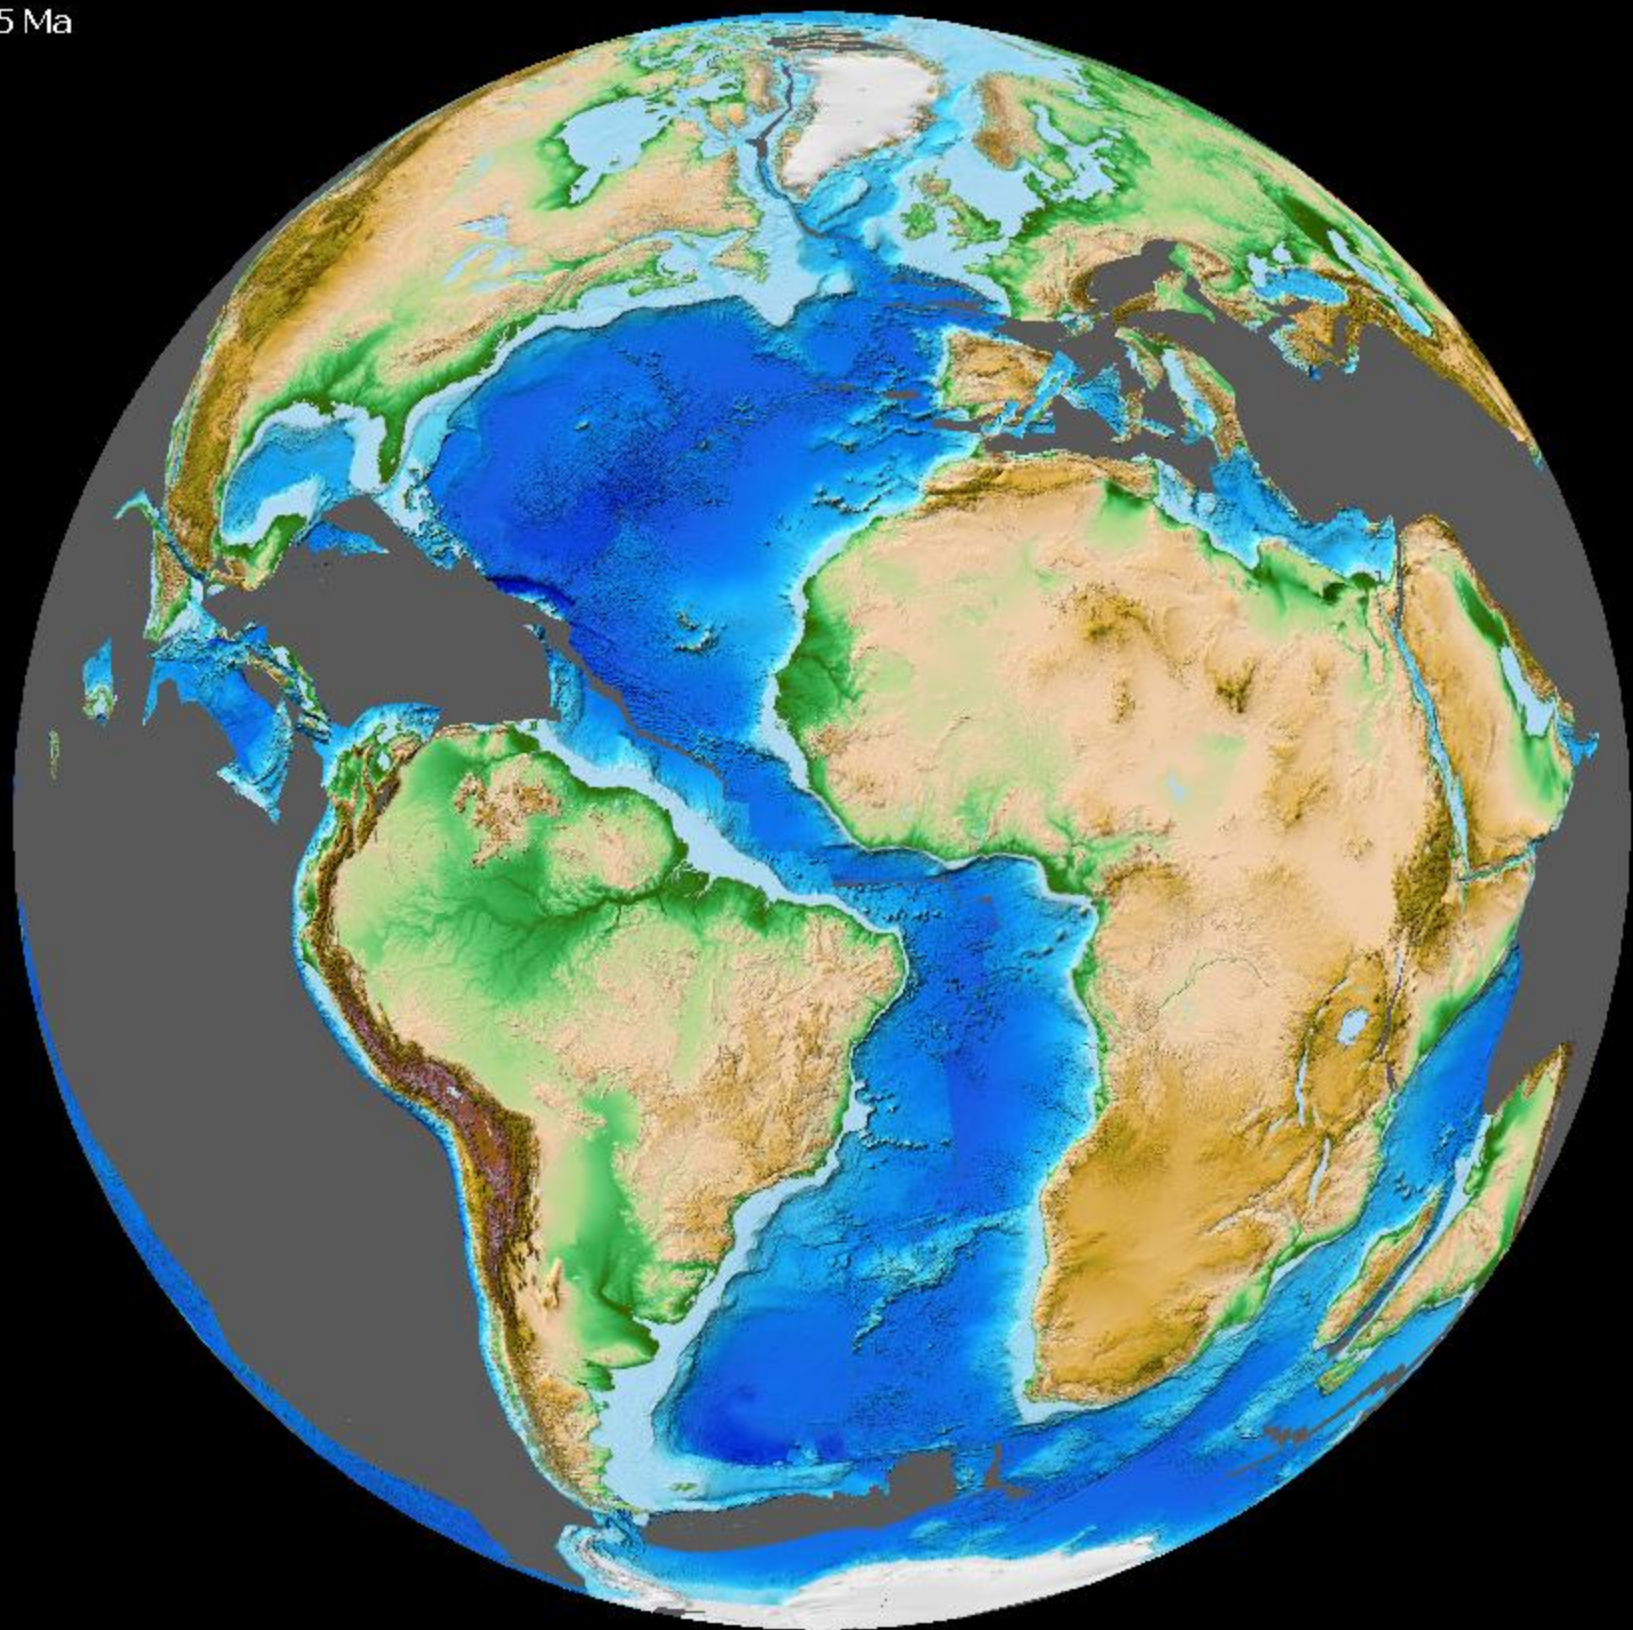



90 Ma

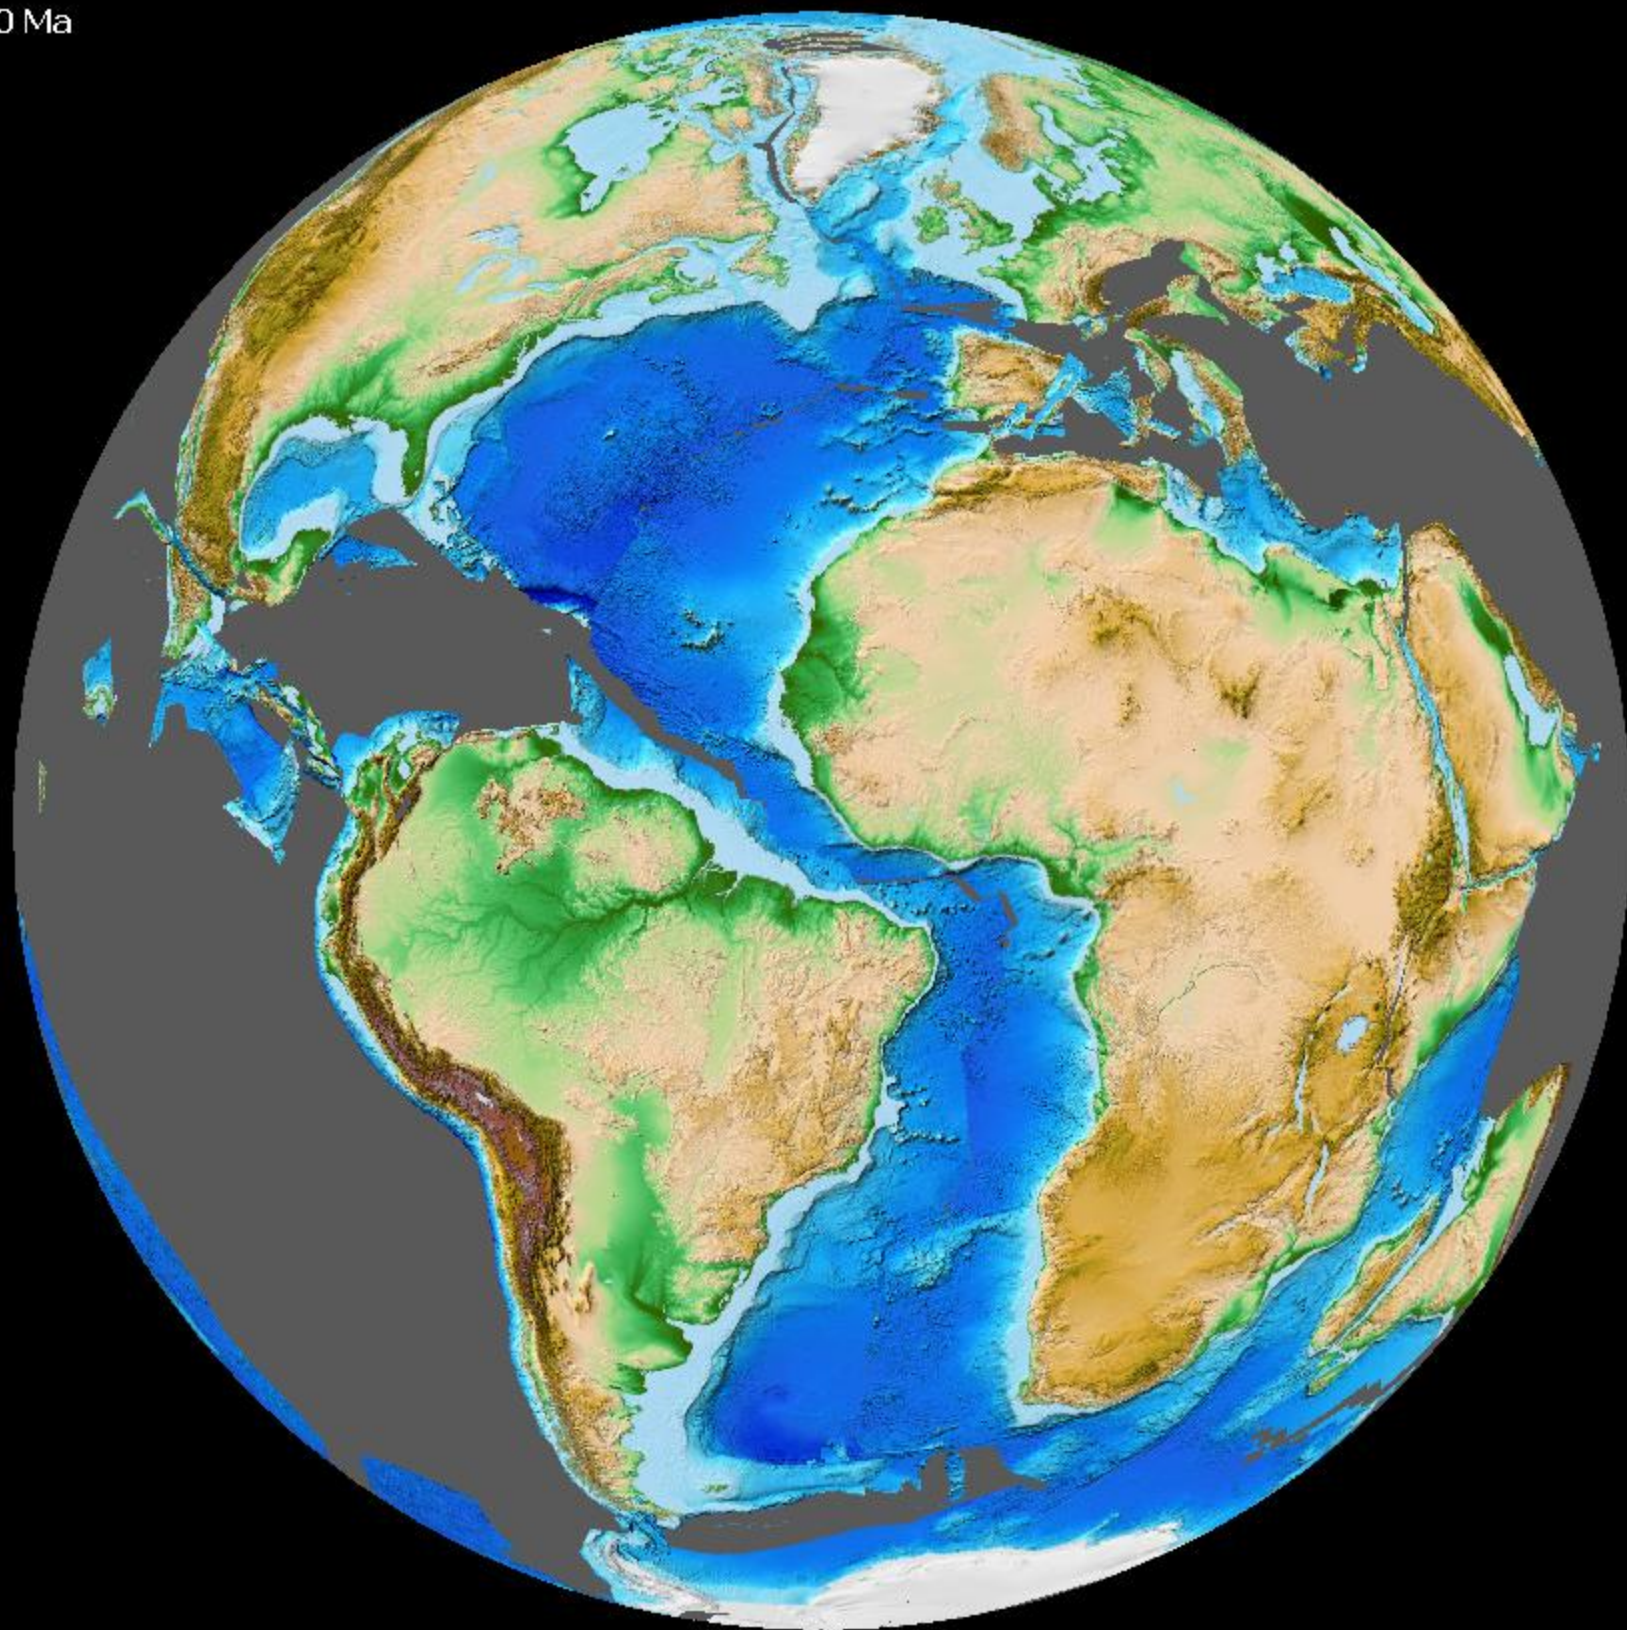



95 Ma

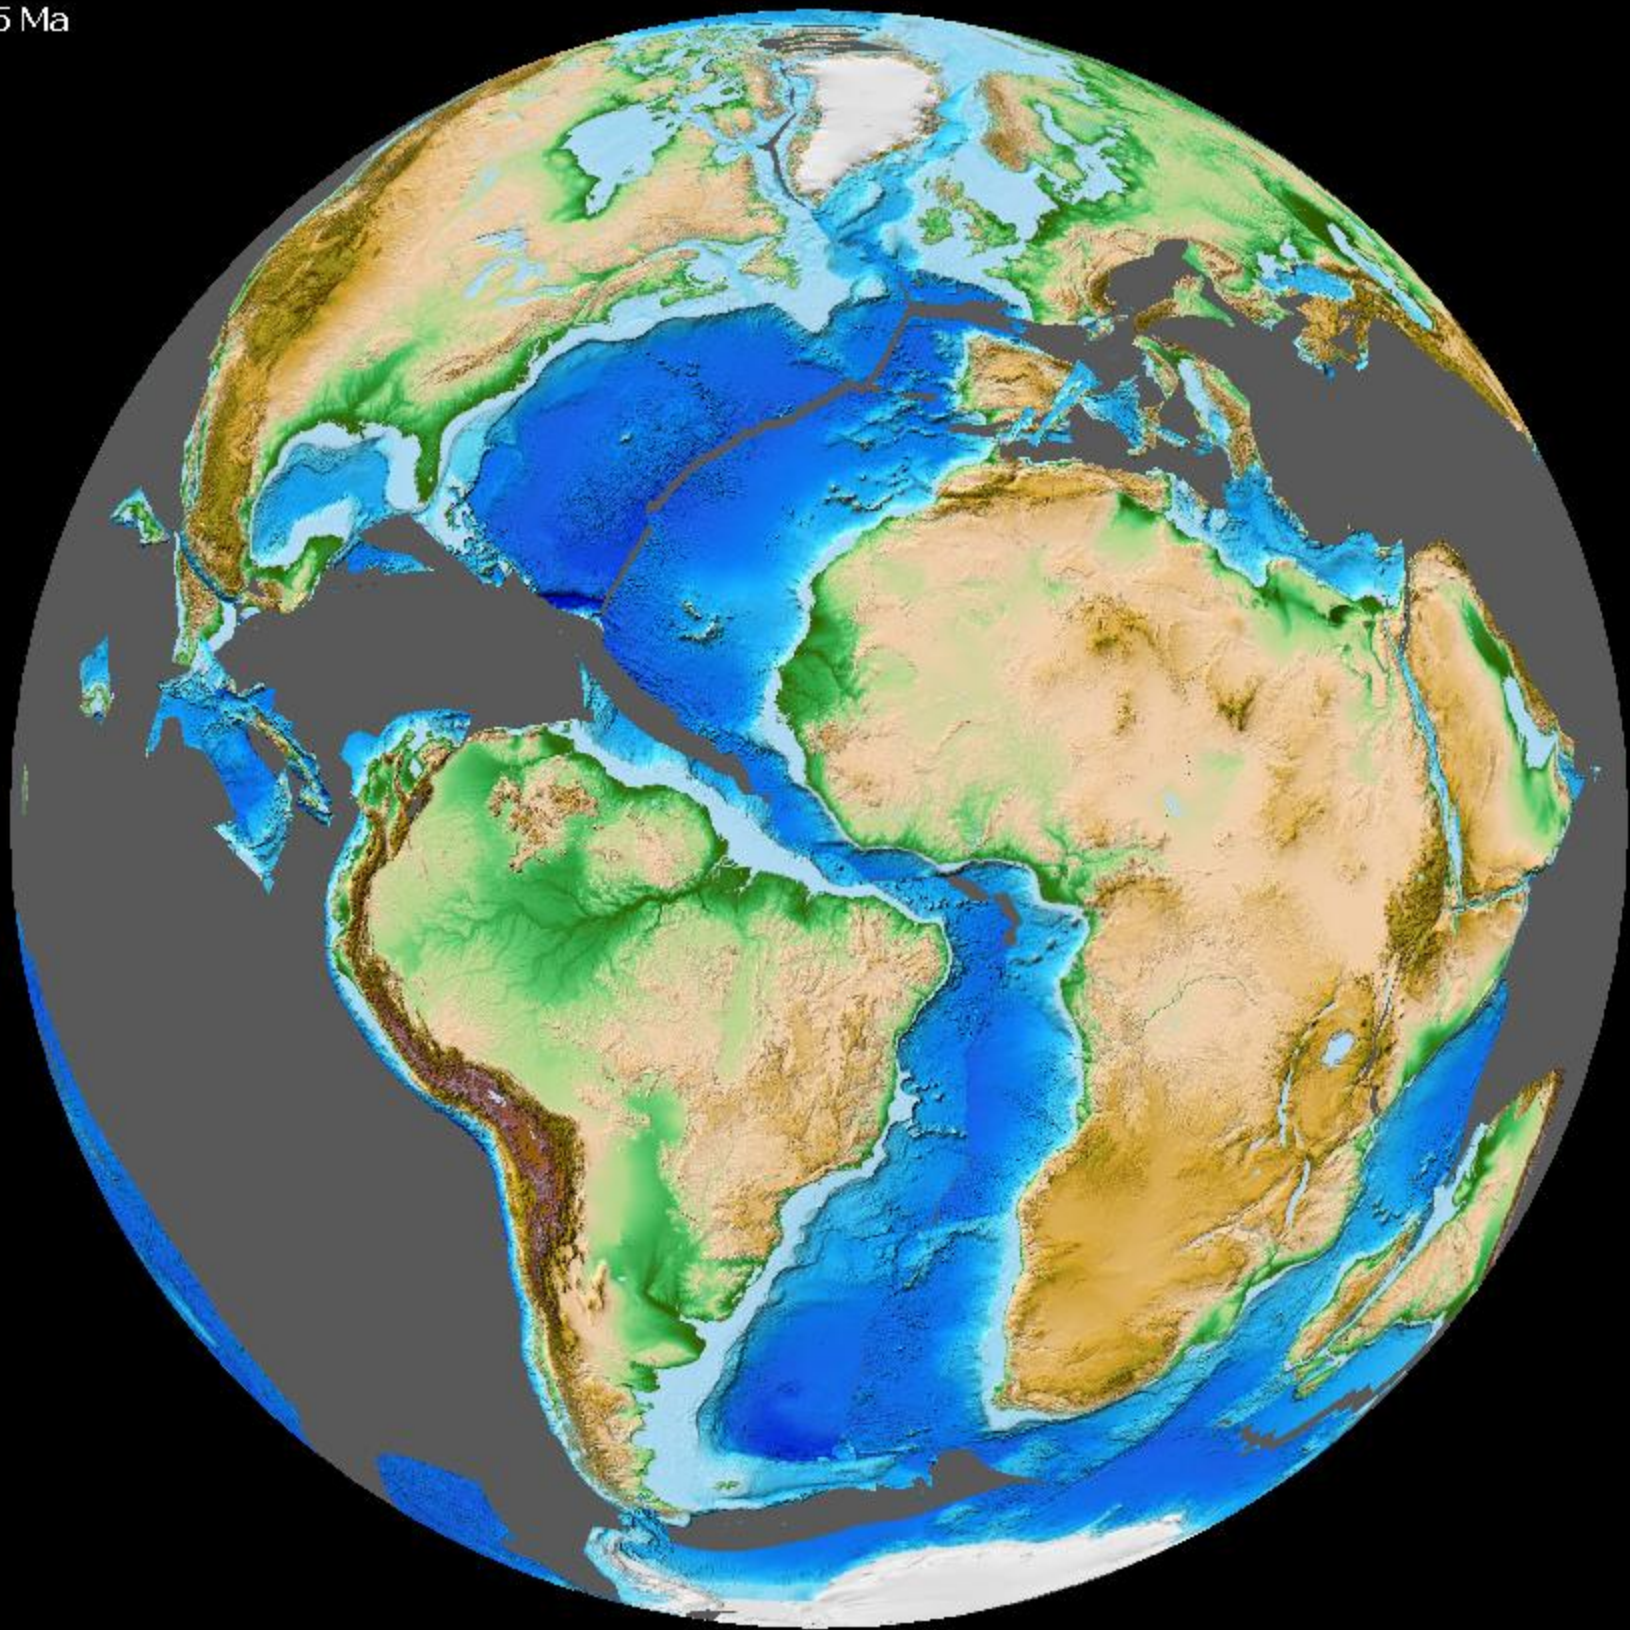



100 Ma

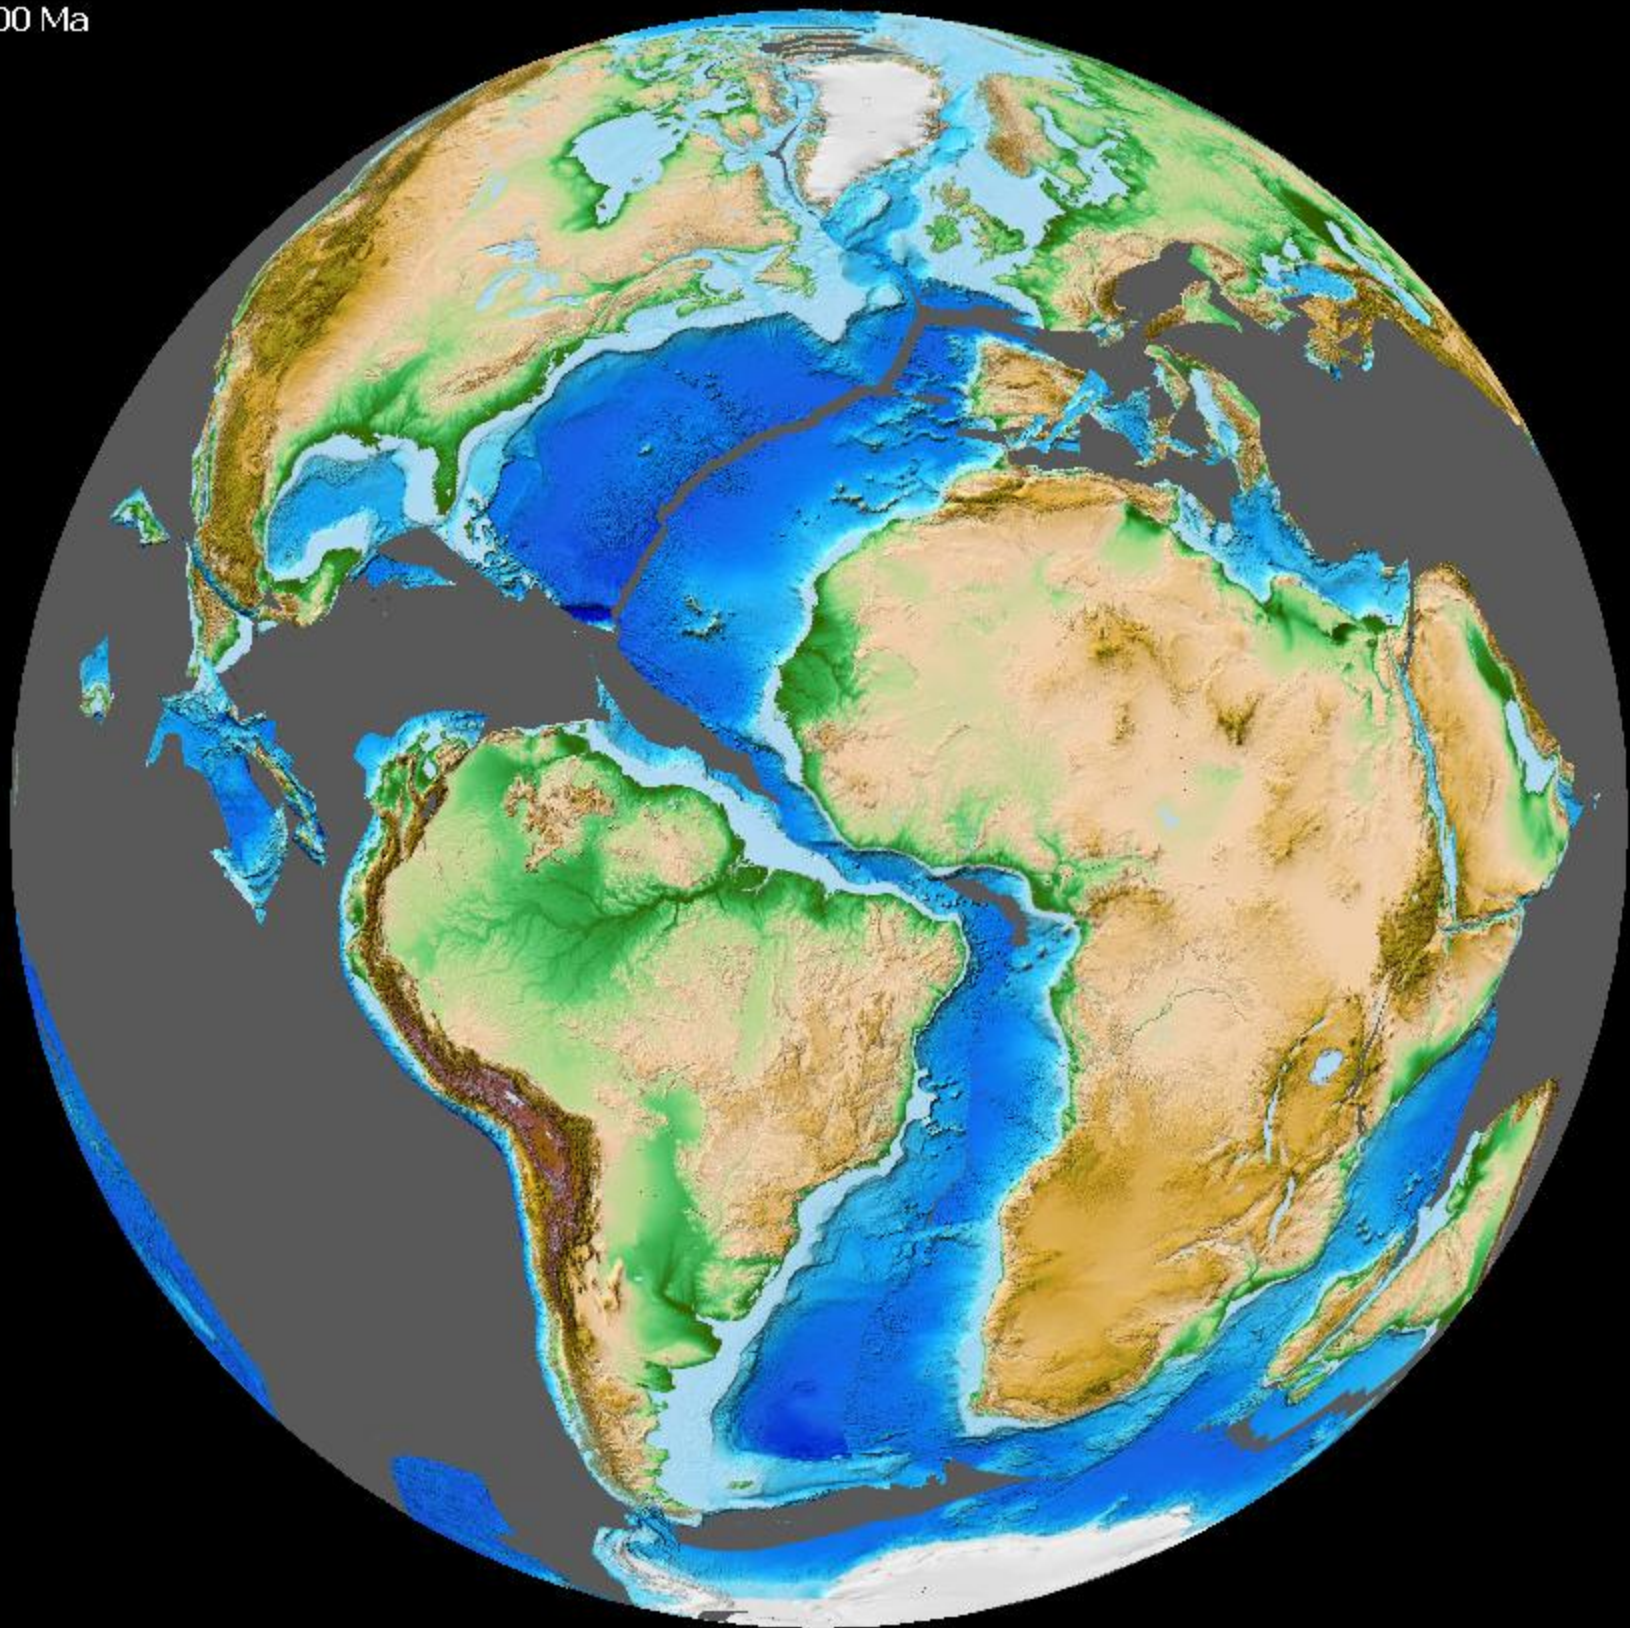



105 Ma

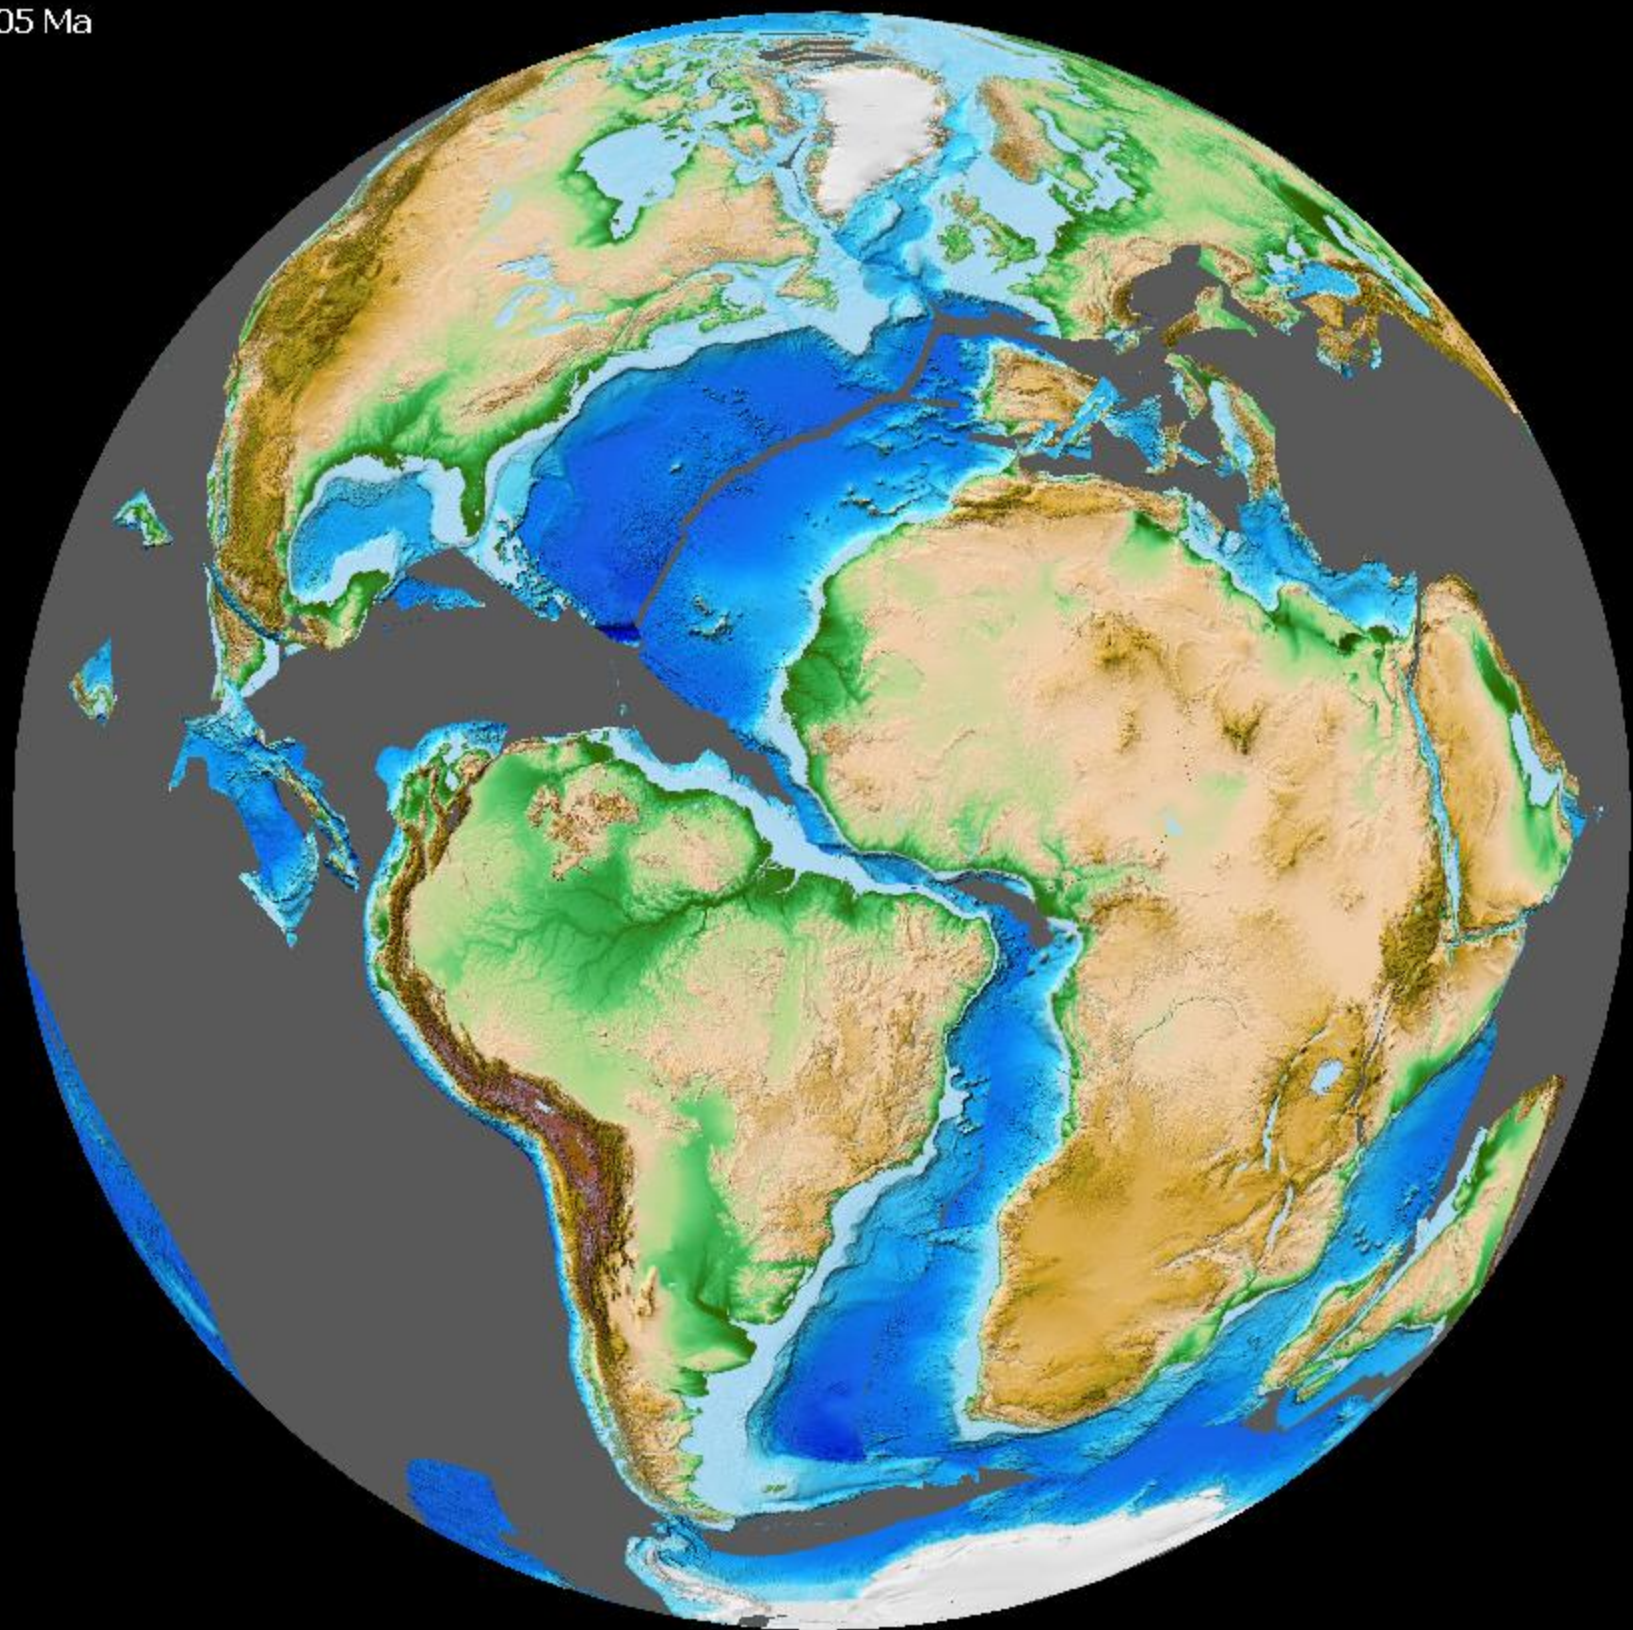



110 Ma

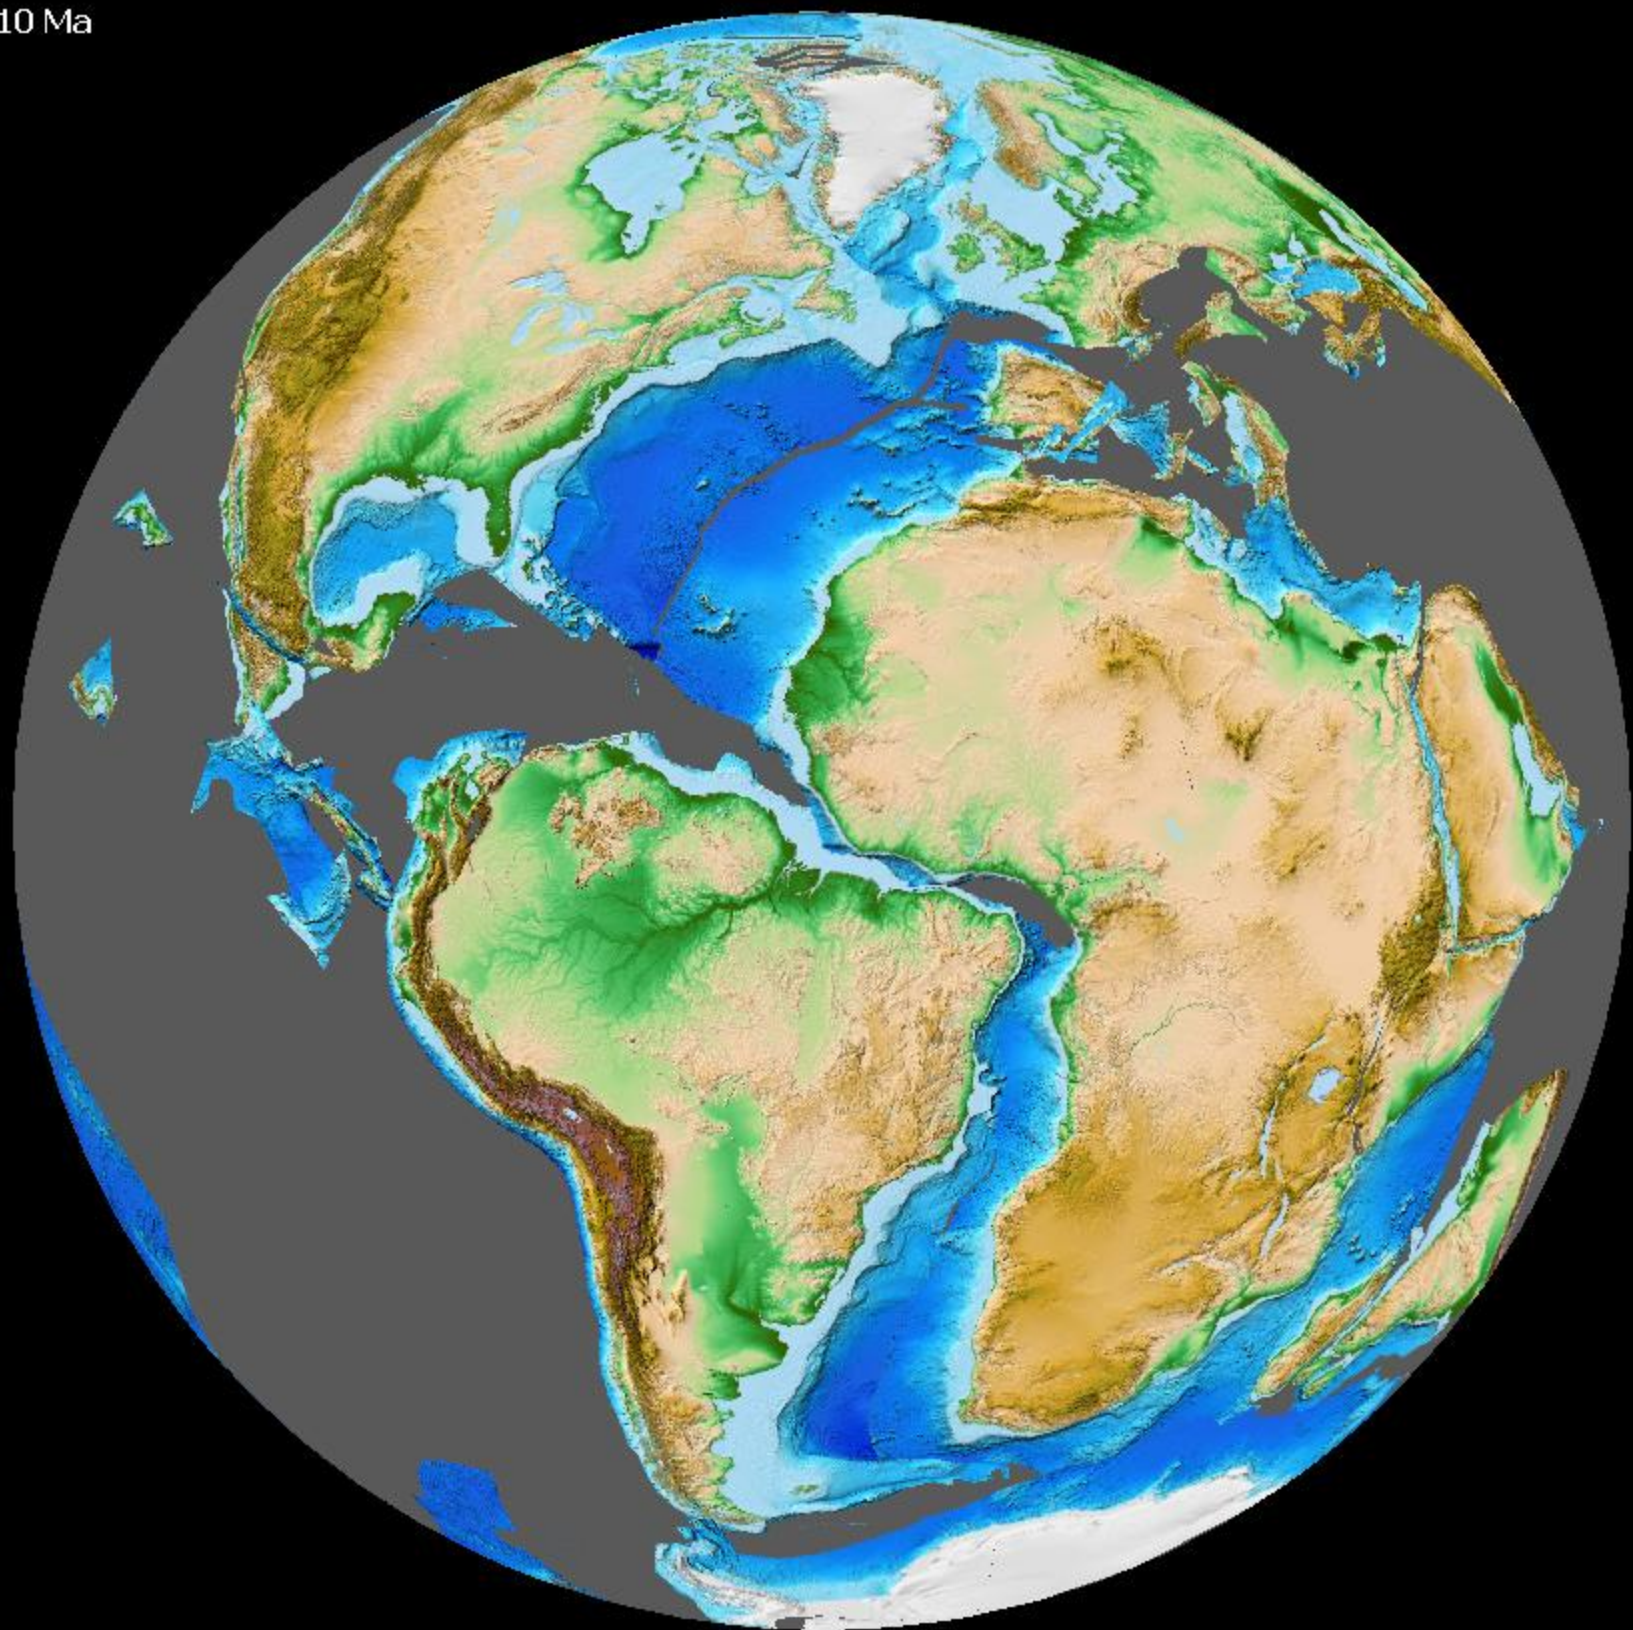



115 Ma

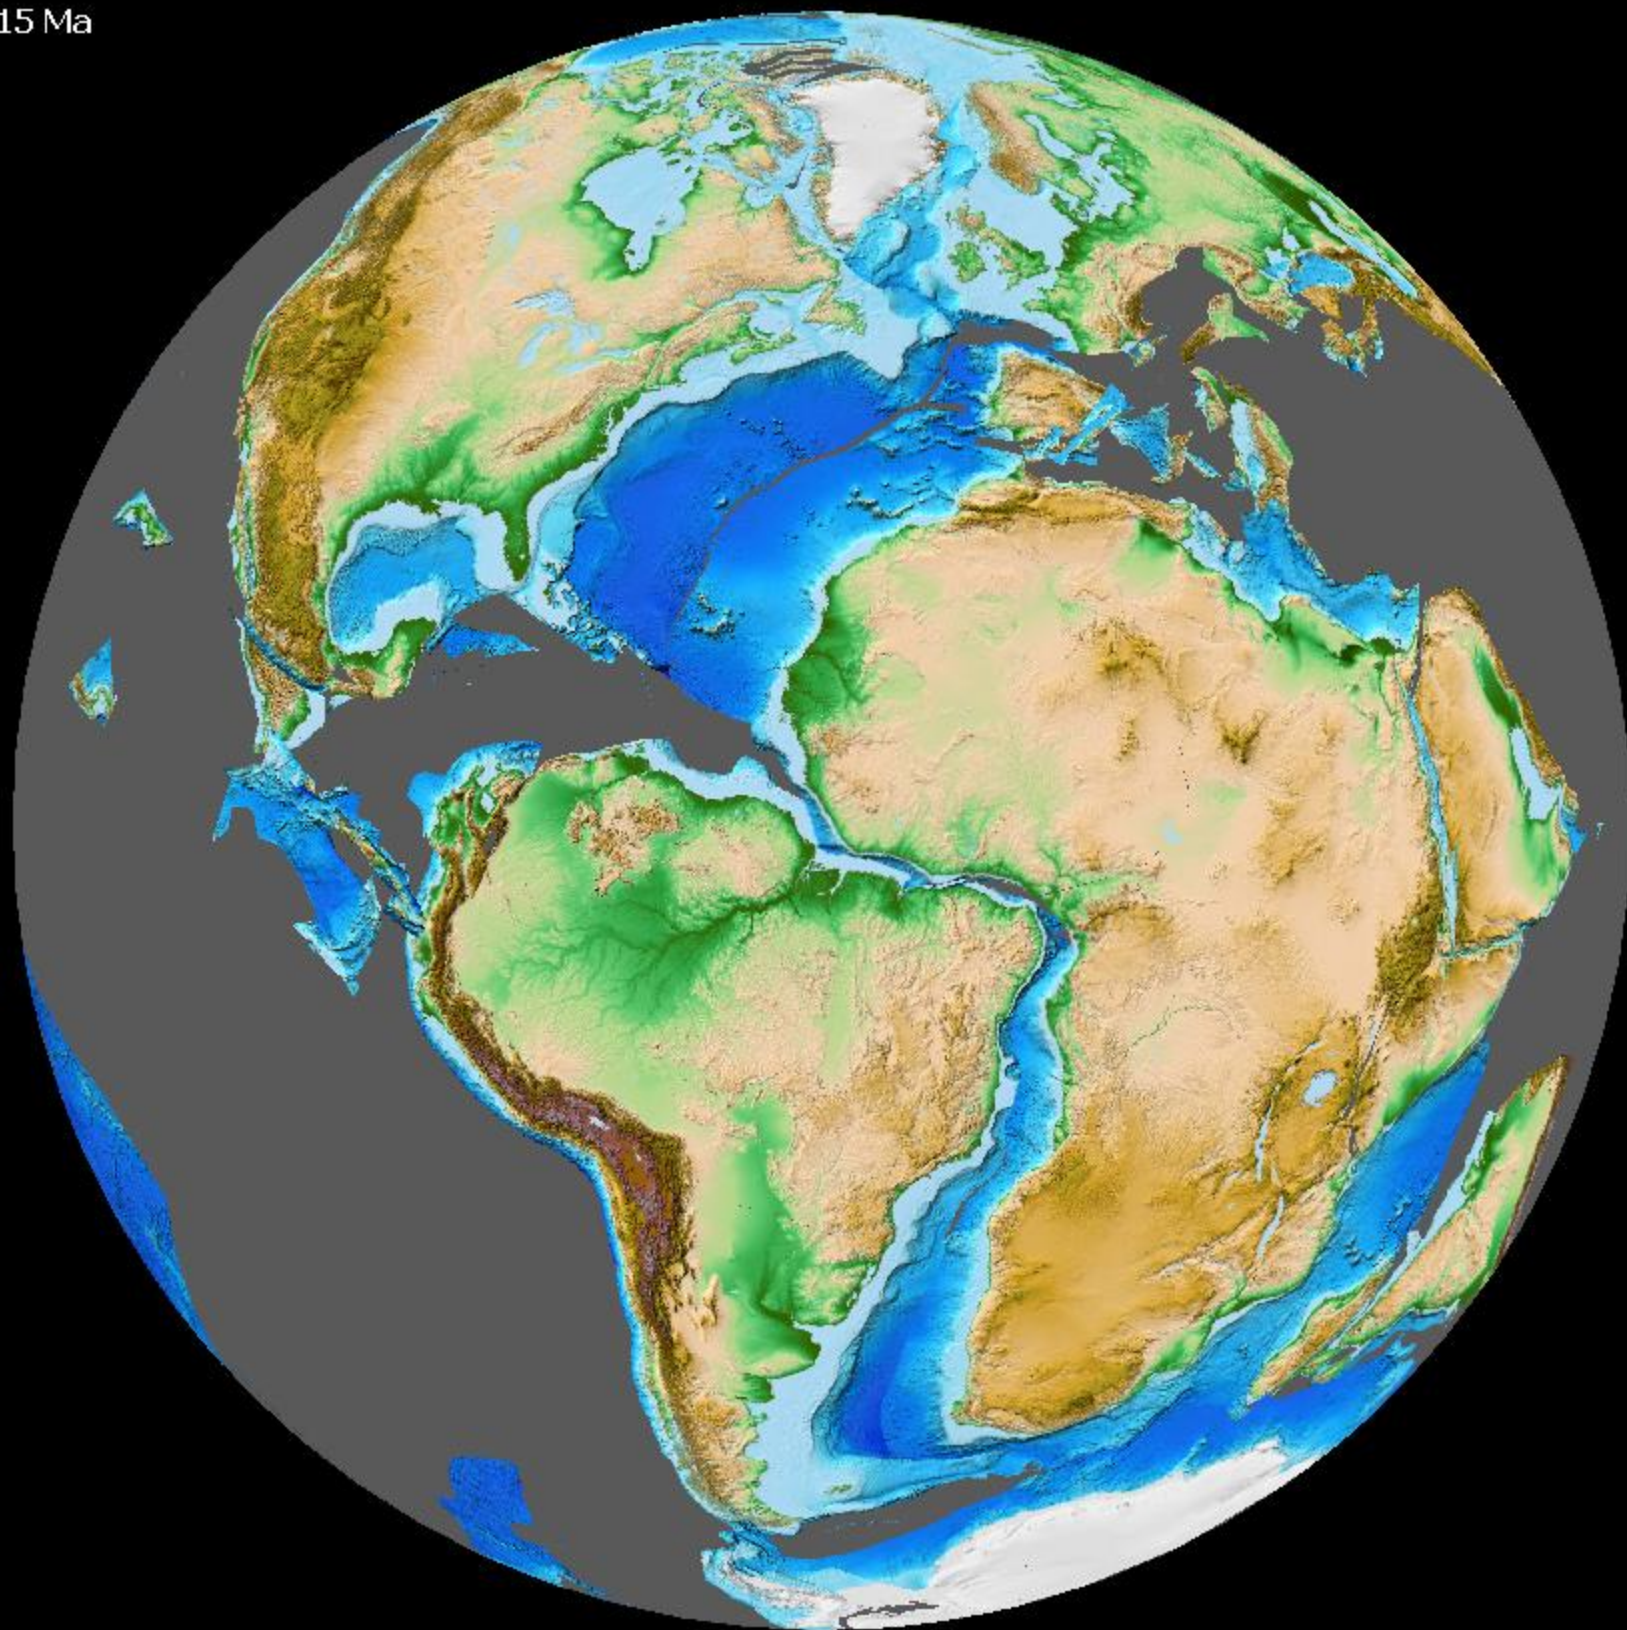



120 Ma

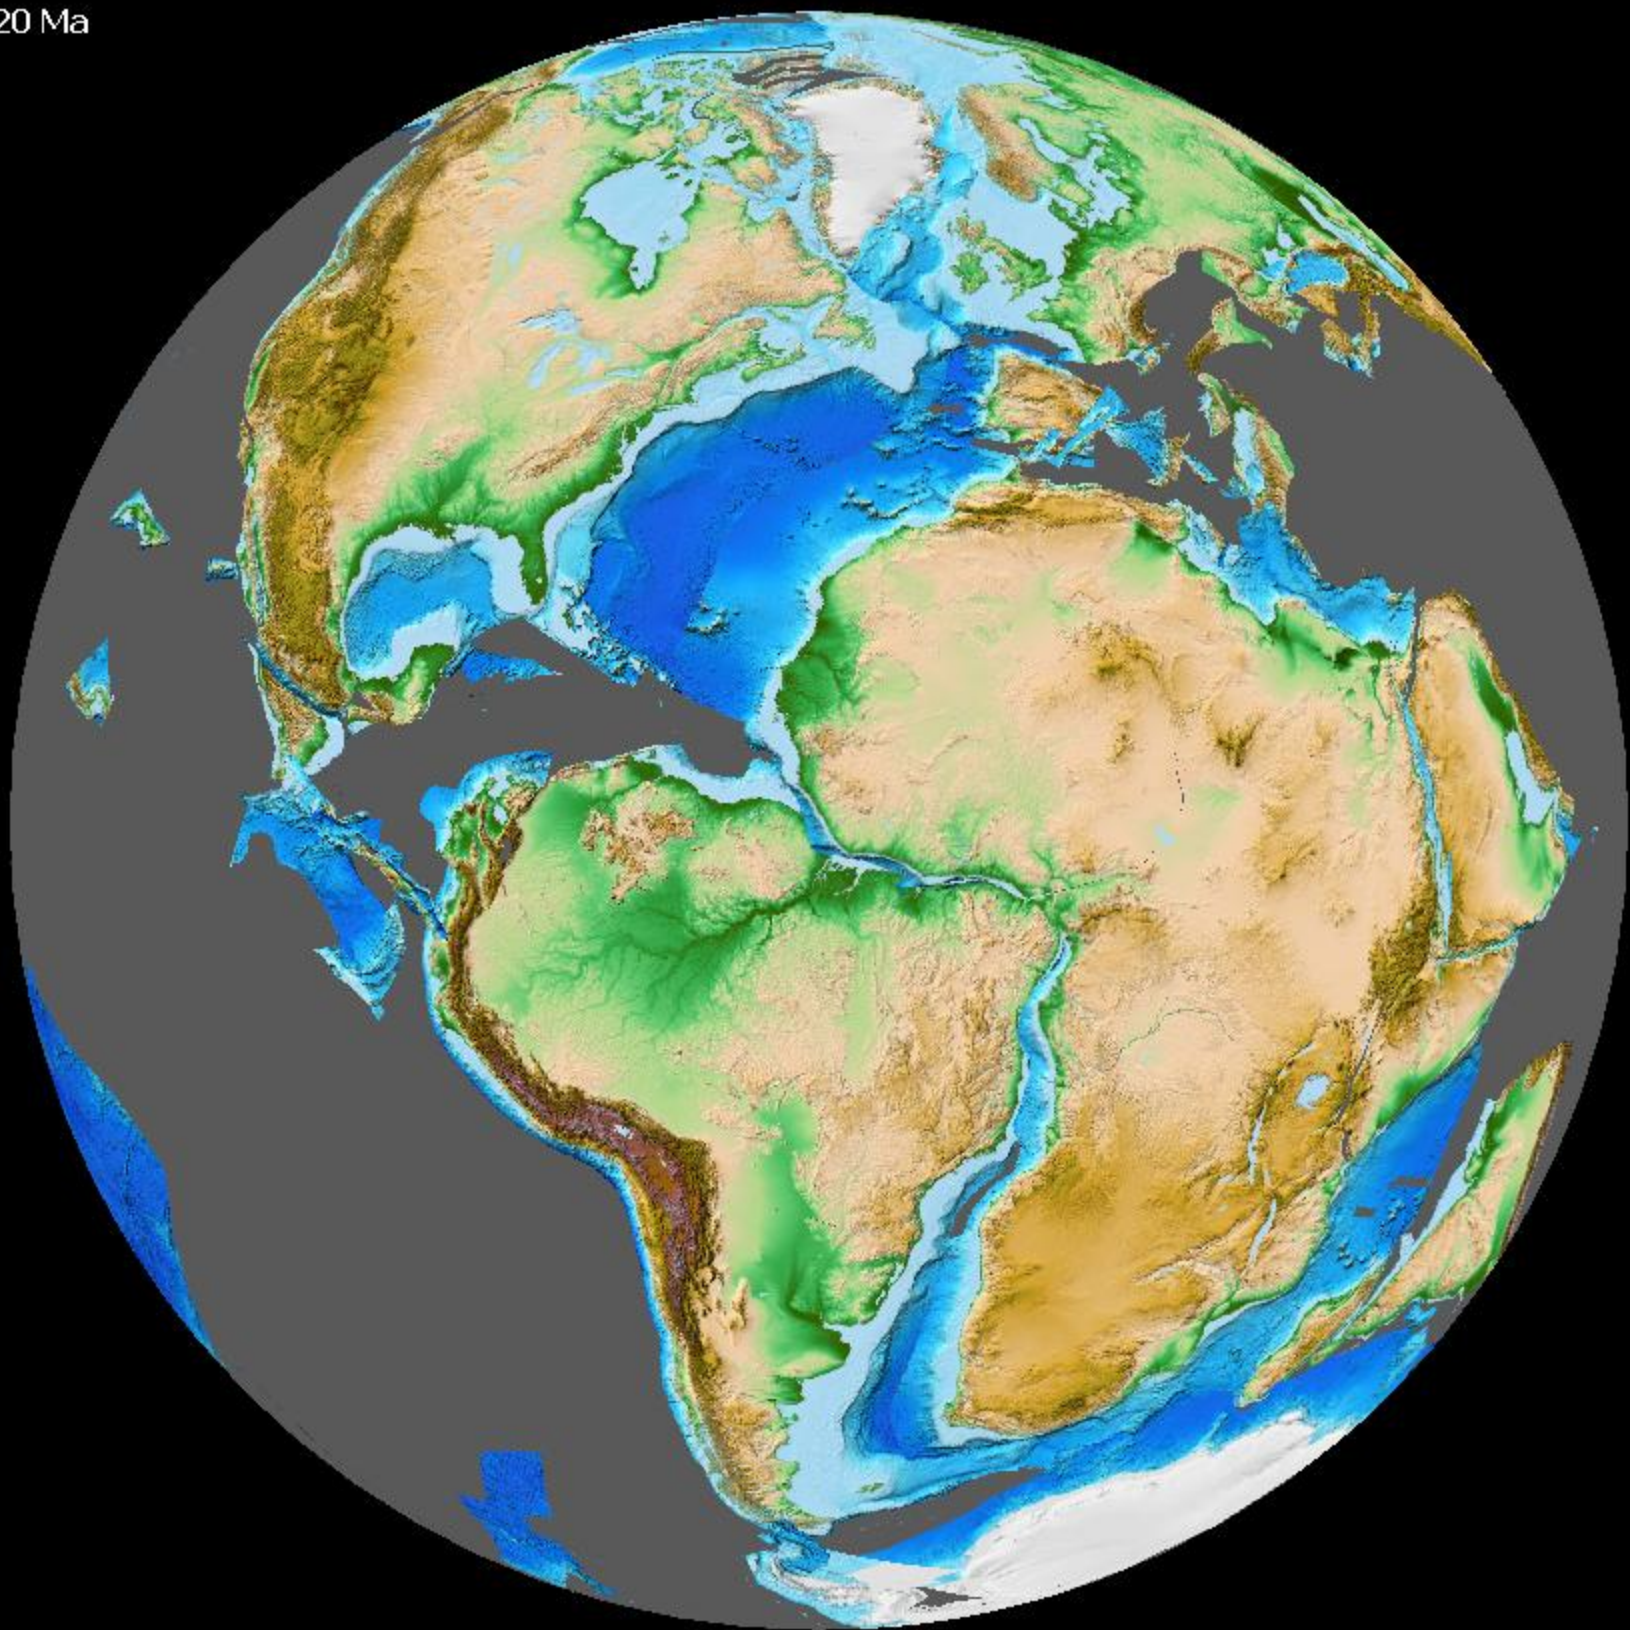



125 Ma

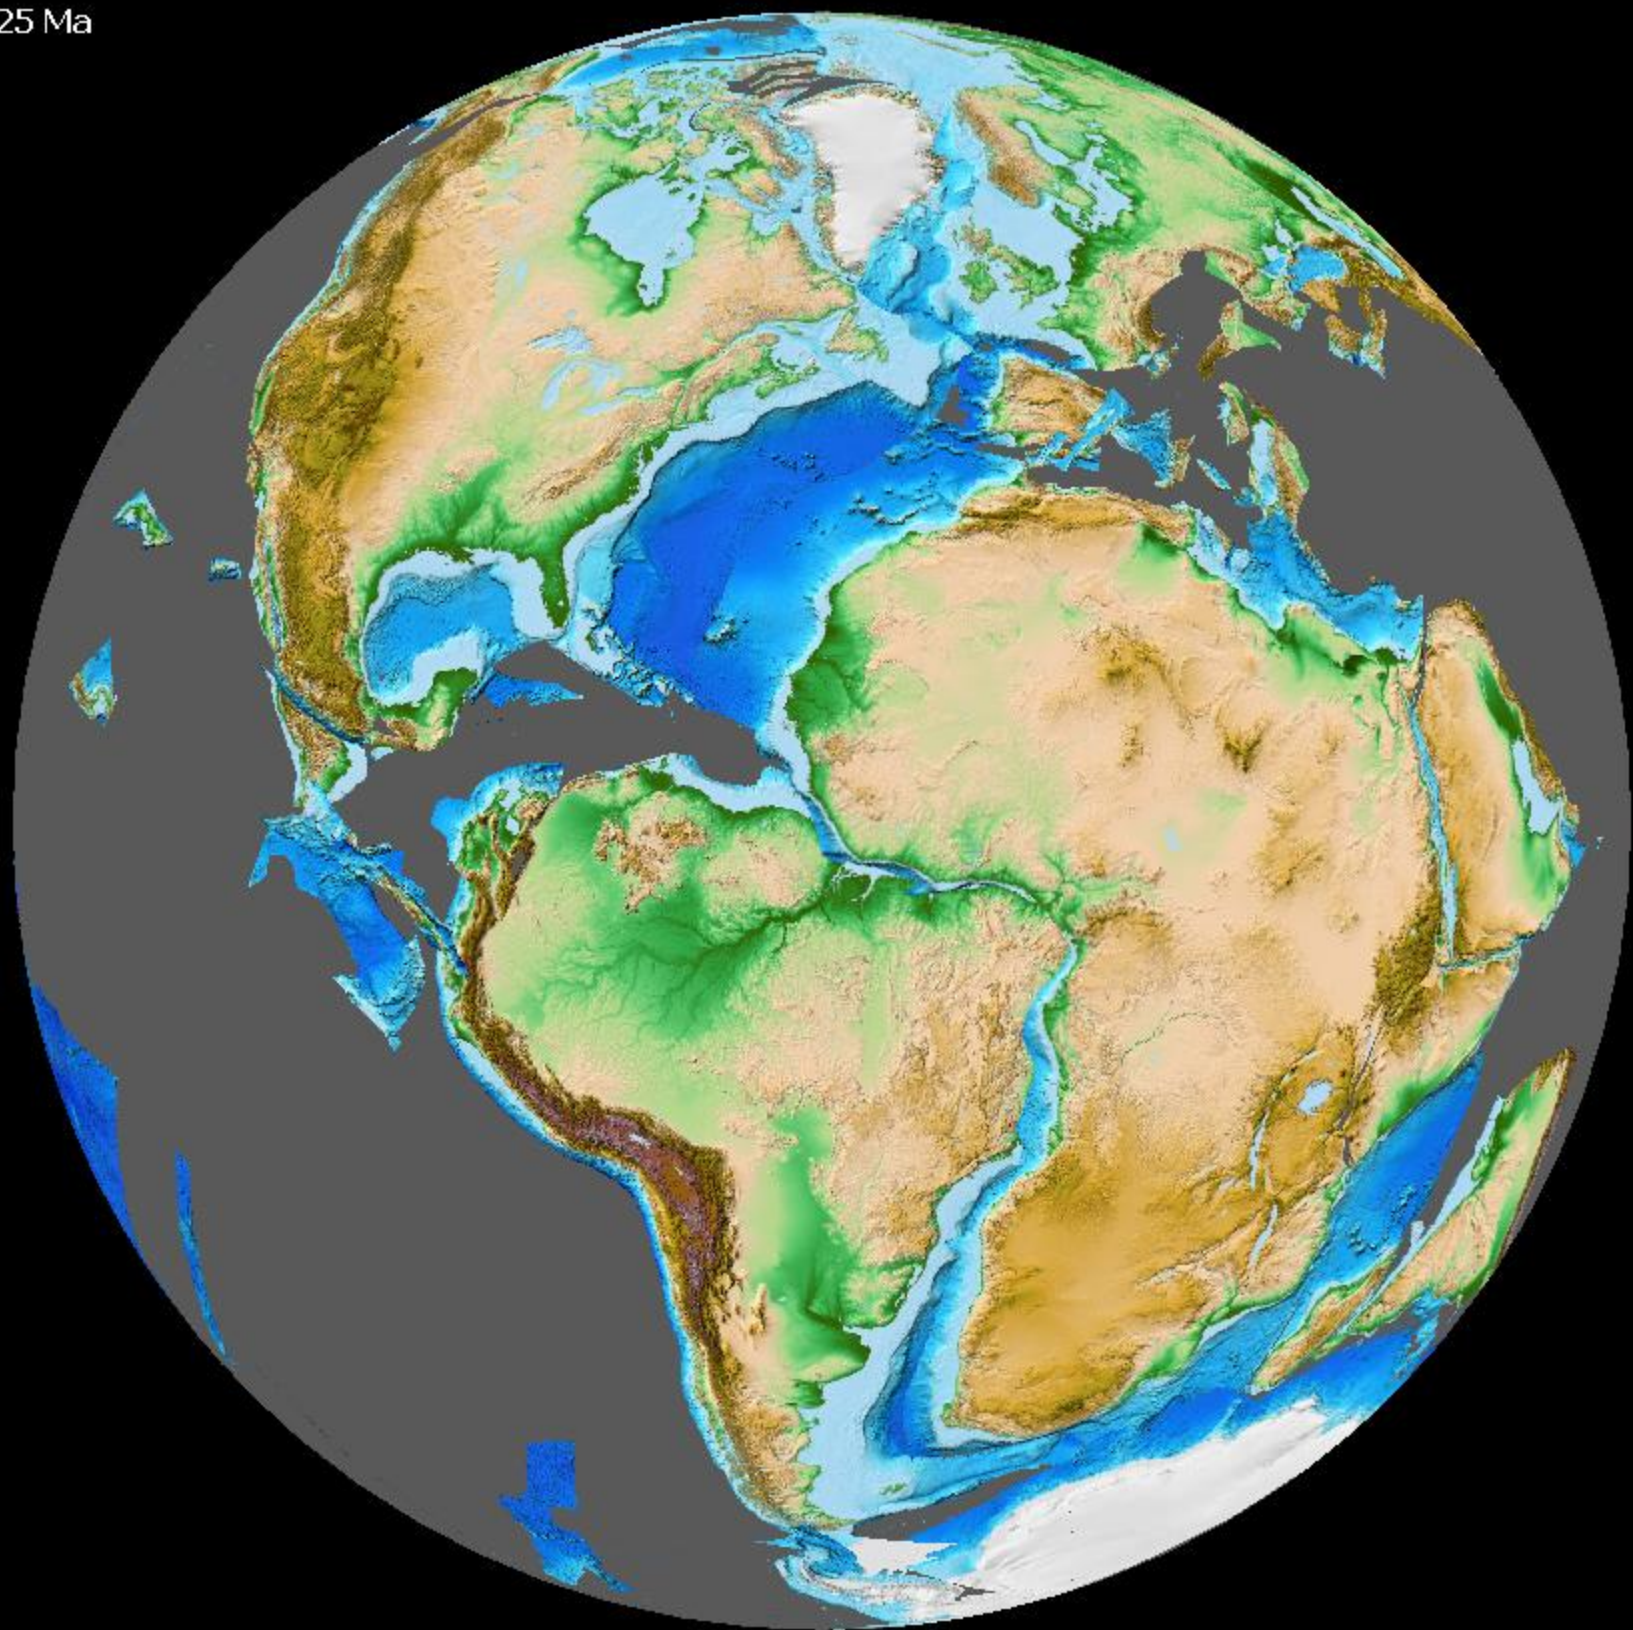



130 Ma

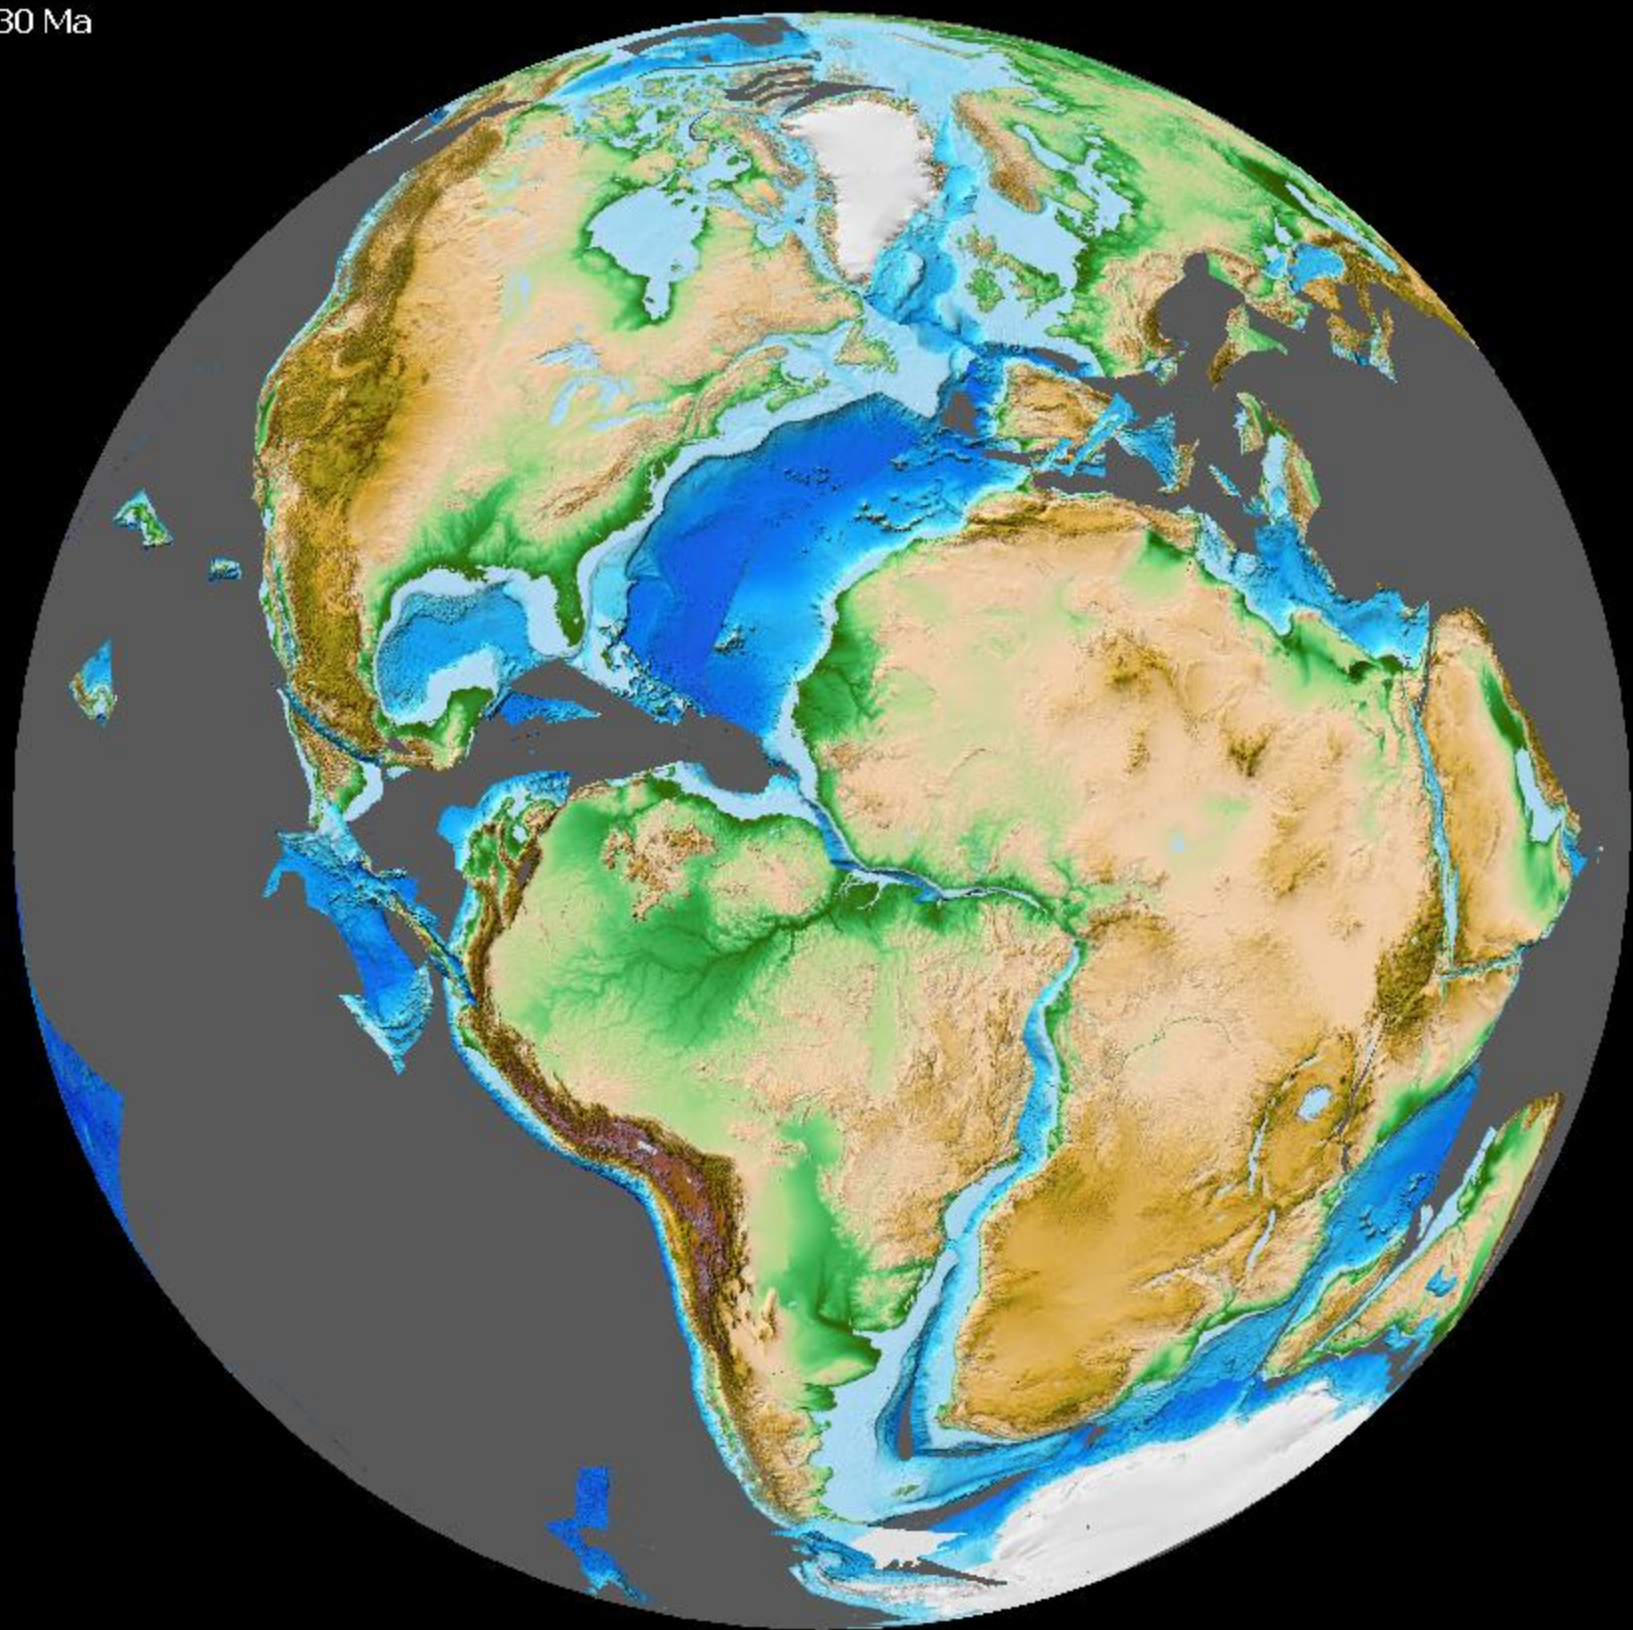



135 Ma

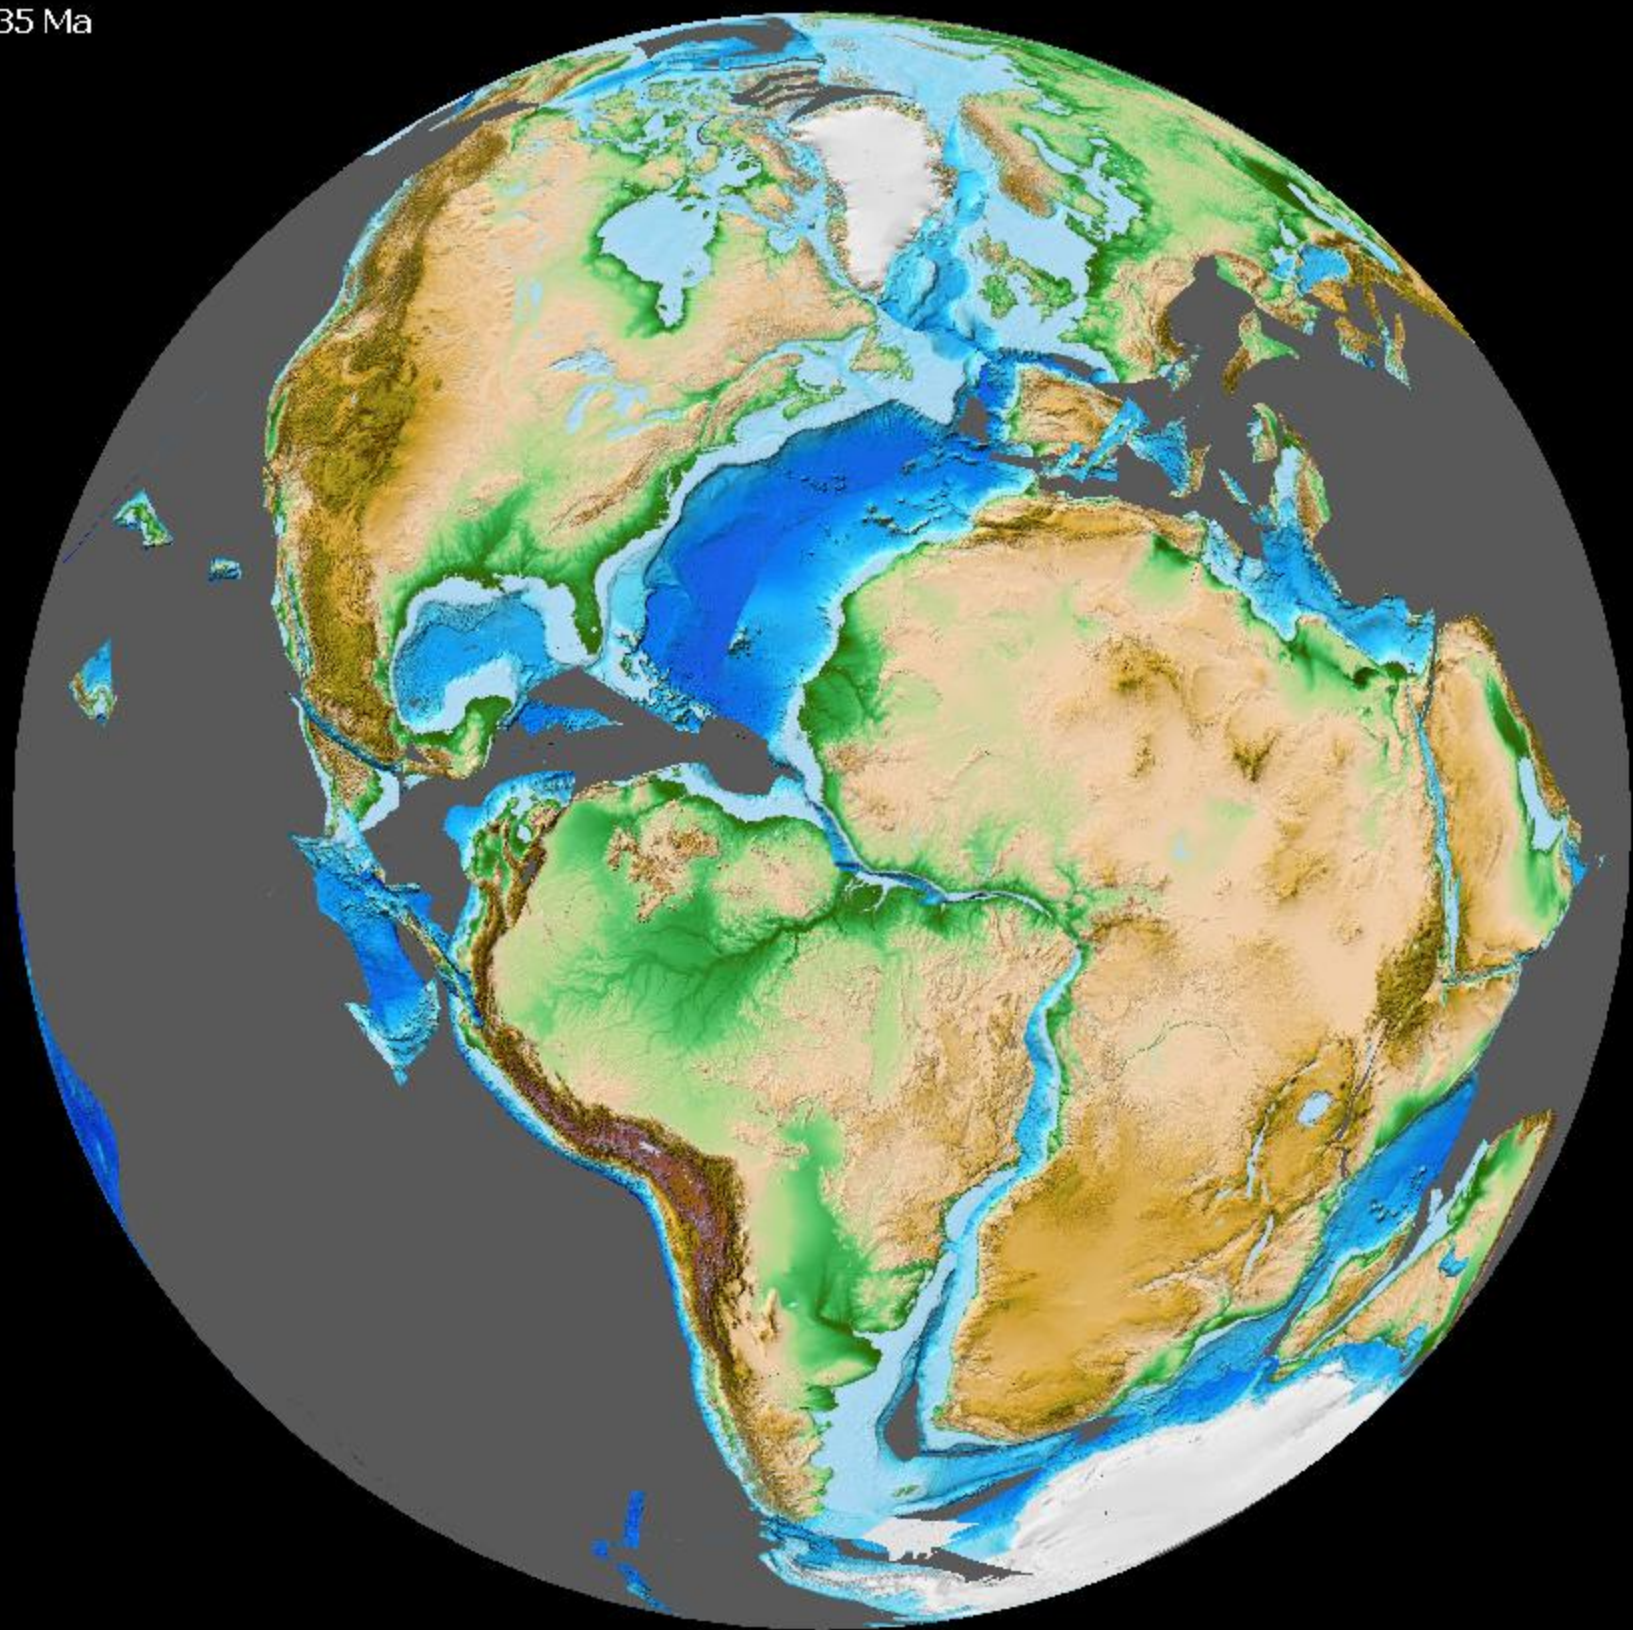



140 Ma

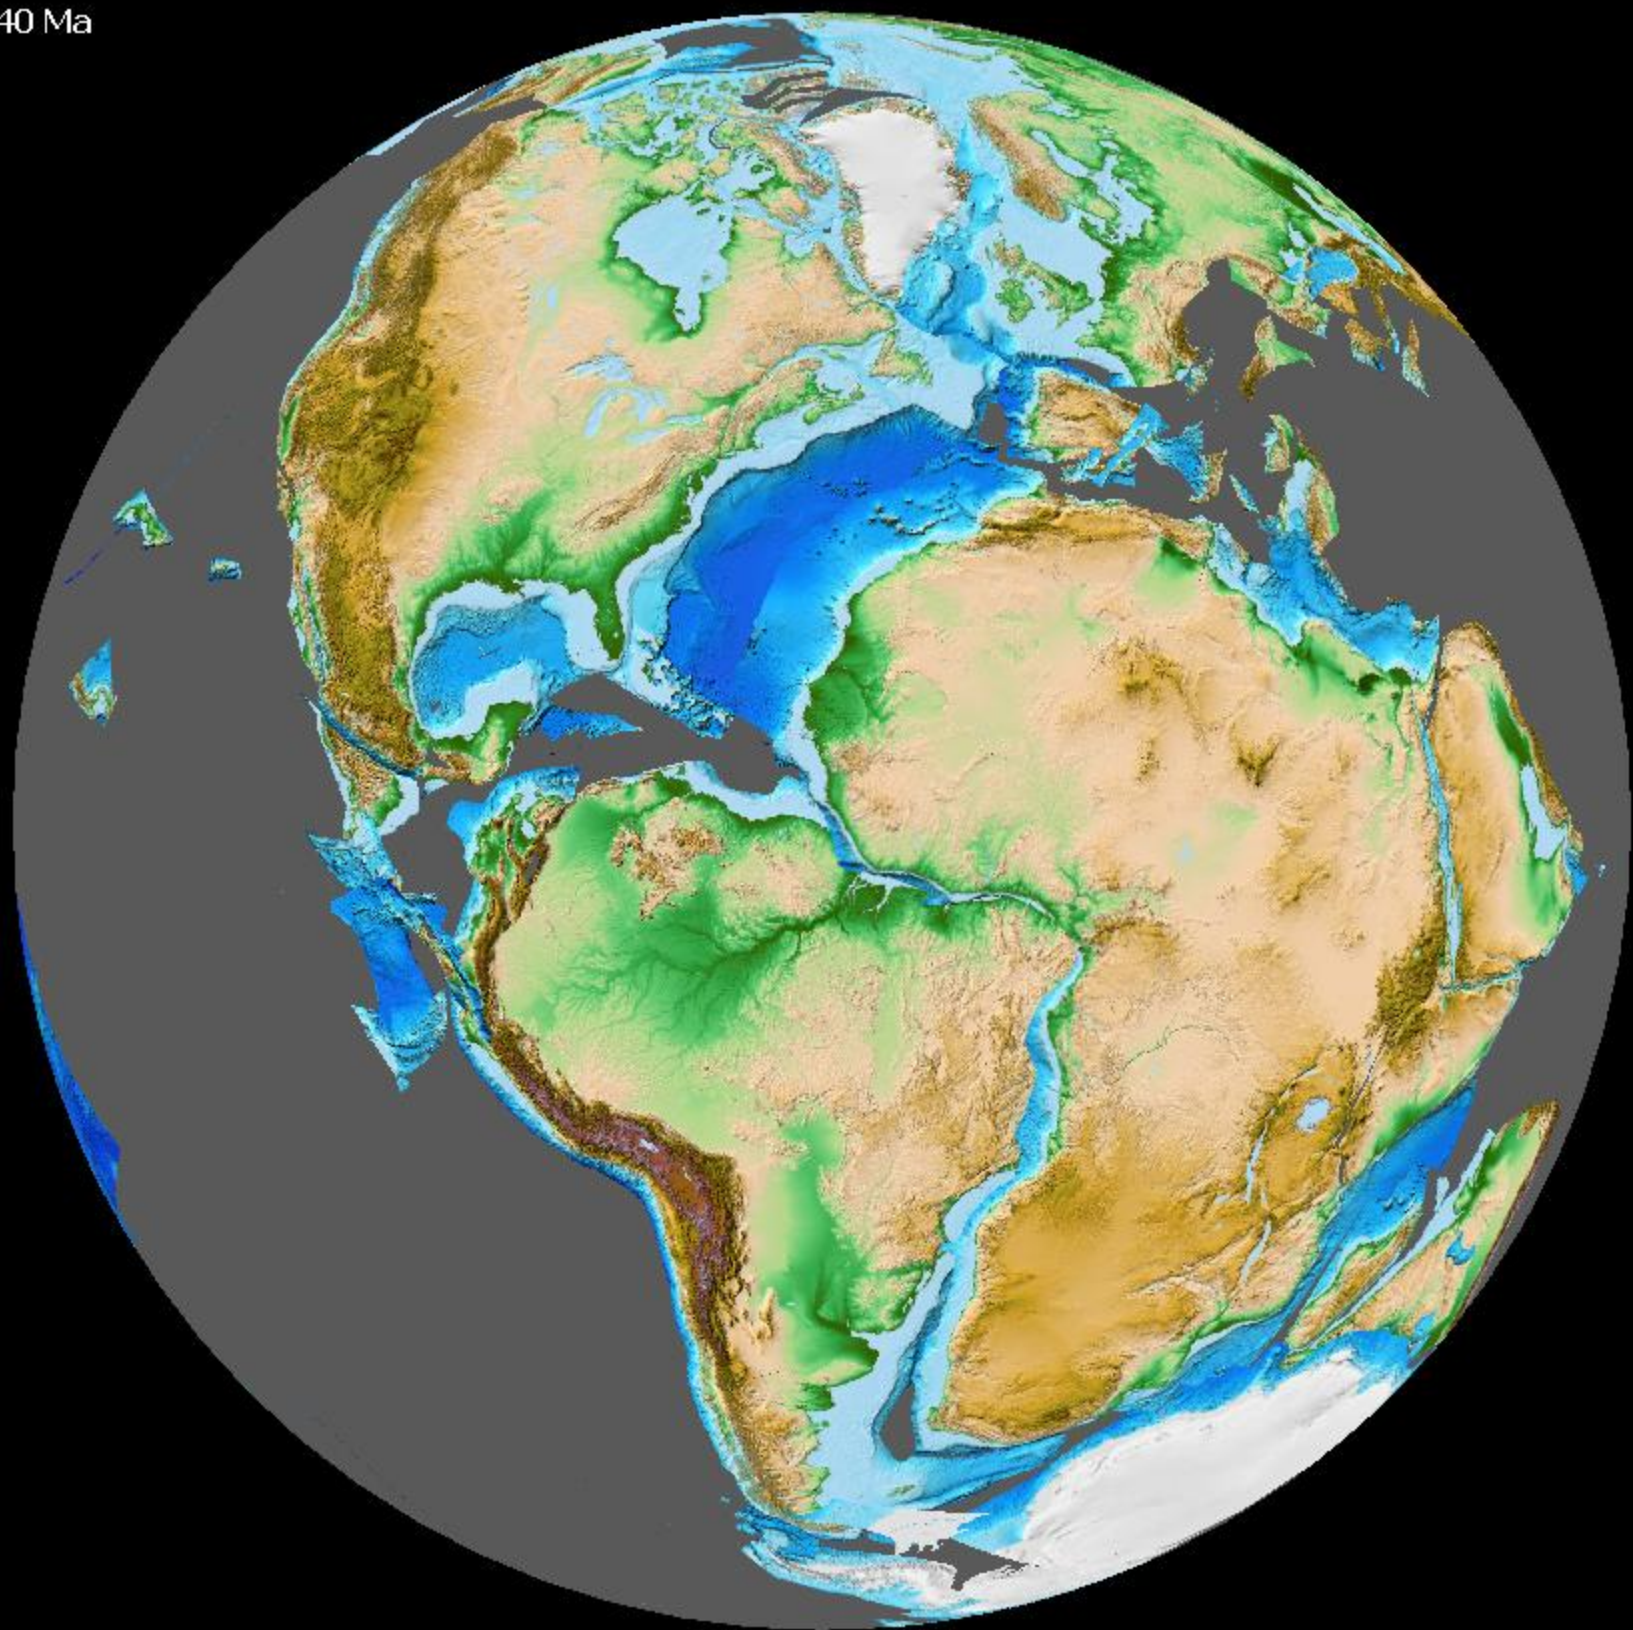

Supplement: Supplementary file 2 [file 1]
